# Supplementary material for: Photocatalytic direct intermolecular addition of 1,3-dithianes
Source: Royal Society of Chemistry journal article supplement (doi:10.1039/c5ra19069j), 2015-01-01

## Supporting Information for

### **Photocatalytic Direct Intermolecular Addition of 1,3-Dithianes**

Ming Lee, Ying-Ho Chen, Tzu-Hang Hung, Wen Chang, Wei-Cheng Yan and Dasheng Leow\*

*Department of Chemistry, National Tsing Hua University, 101, Sec 2, Kuang-Fu Rd., Hsinchu  
30013, Taiwan*

#### **Table of Contents**

|                                                                                                                                   |         |
|-----------------------------------------------------------------------------------------------------------------------------------|---------|
| 1. General Information                                                                                                            | S2      |
| 2. Experimental Section                                                                                                           | S3–S18  |
| 2.1. Standard reaction set-up                                                                                                     | S3      |
| 2.2. Optimization studies                                                                                                         | S4–S5   |
| 2.3. Synthesis of starting materials                                                                                              | S6–S8   |
| 2.4. General procedure for photocatalytic direct intermolecular addition of various 1,3-dithiane derivatives with methyl acrylate | S9–S12  |
| 2.5. General procedure for photocatalytic direct intermolecular addition of 1,3-dithiane with various electron-deficient alkenes  | S13–S15 |
| 2.6. Scalable photocatalytic direct intermolecular addition of 1,3-dithiane                                                       | S16     |
| 2.7. Procedure for deprotection of 1,3-dithiane                                                                                   | S17     |
| 2.8. Preliminary mechanistic studies                                                                                              | S18     |
| 3. References                                                                                                                     | S19     |
| 4. NMR Spectra of New Compounds                                                                                                   | S20–S48 |

## 1. General Information

All commercial reagents were purchased from Sigma-Aldrich, Fluka, Alfa Aesar, TCI, Acros, AKSci, and Energy Chemicals of the highest purity grade. They were used without further purification unless specified. Hexane and ethyl acetate (EtOAc) were distilled before use. Anhydrous THF were distilled from Na. HPLC grade solvents were obtained from suppliers and used as received. All reactions were conducted in 10 cm × 2 cm, 30 mL Pyrex Schlenk tube with PTFE-lined screw cap and a side arm. All experiments were monitored by analytical thin layer chromatography (TLC). TLC was performed on pre-coated plates, Merck 60 F<sub>254</sub>. After elution, plate was visualized under UV illumination at 254 nm for UV active material. Further visualization was achieved by staining with iodine or KMnO<sub>4</sub> stain. Preparative TLC was performed on 0.5 mm silica gel (Merck). Solvents were removed *in vacuo* under ~30 mmHg and heated with a water bath at 40 °C using Eyela or Büchi rotary evaporator with Eyela A-3S aspirator. Columns for flash chromatography (FC) contained silica gel (32–63 $\mu$ , Merck). Columns were packed as slurry of silica gel in hexane and equilibrated with the appropriate solvent/solvent mixture prior to use. The analyte was loaded neat or as a concentrated solution using the appropriate solvent system. The elution was assisted by applying pressure with constant flow of air.

Solid reagents were weighed using AND HR-200 analytical balance, with accuracy of 0.1 mg. Liquid reagents were measured using Hamilton microsyringes. Reactions requiring temperatures up to –40 °C were stirred in Greatwall DHJF-4002 cryobath with digital temperature controller. Isopropanol was used as the bath medium. <sup>1</sup>H and <sup>13</sup>C NMR spectra were recorded on Varian 400-MR (400 MHz and 100 MHz, respectively). The peaks were internally referenced to TMS (0.00 ppm) or residual solvent signal. The following abbreviations (or combinations thereof) were used to explain multiplicities: s = singlet, d = doublet, t = triplet, q = quartet, m = multiplet, and br = broad. High resolution mass spectra (ESI) were recorded on a Varian 901-MS with Varian HPLC ProStar 210 solvent delivery module, ProStar 410 auto-sampler, and ProStar 335 photodiode array detector. High resolution mass spectra (EI) were recorded on a Finnigan MAT-95XL. IR spectra were recorded on a Bruker ALPHA Ge-ATR FTIR spectrometer. Frequencies were given in reciprocal centimeters (cm<sup>-1</sup>). Fluorescence spectrum were recorded on a Hitachi F–2500 fluorescence spectrophotometer.

## 2. Experimental Section

### 2.1. Standard reaction set-up

In a typical experiment, a 23 W compact fluorescent light (CFL) bulb (Philips Tornado 23 W cool daylight, model 317643, 6500K color temperature, 1403 Lm) was used. The lamp was purchased from IKEA (Tertial work lamp). The reaction tubes (10 cm × 2 cm, 30 mL Pyrex Schlenk tube with PTFE-lined screw cap and a side arm) were placed approximately 2 cm from the light source. The setup was then covered with aluminum foil to reduce the glares.

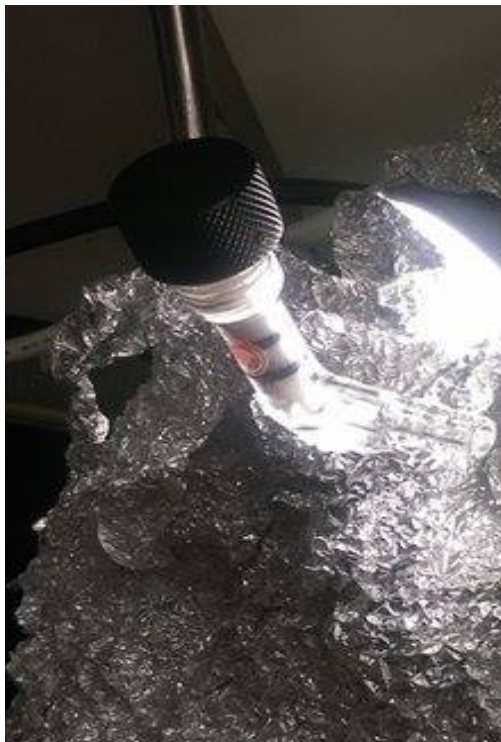

**Figure S1** Typical experimental set-up

## 2.2. Optimization studies

**Table S1** Identification of optimal photocatalyst.<sup>a</sup>

| 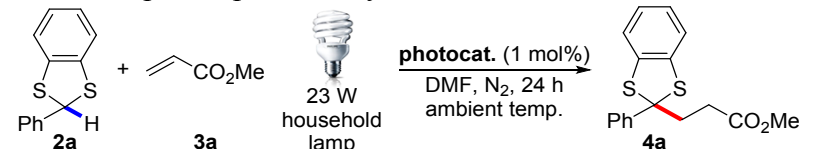 |                                                                                                                                                                                  |                        |       |                                                                                                                                                                                                                           |                        |
|------------------------------------------------------------------------------------|----------------------------------------------------------------------------------------------------------------------------------------------------------------------------------|------------------------|-------|---------------------------------------------------------------------------------------------------------------------------------------------------------------------------------------------------------------------------|------------------------|
| entry                                                                              | photocat.                                                                                                                                                                        | yield (%) <sup>b</sup> | entry | photocat.                                                                                                                                                                                                                 | yield (%) <sup>b</sup> |
| 1                                                                                  | —                                                                                                                                                                                | <5                     | 5     | <br><b>1d Ir(ppy)<sub>3</sub></b><br>$E_{1/2}(M^*/M^-) = 0.31 \text{ V vs SCE}^1$                                                       | <5                     |
| 2                                                                                  | <br><b>1a Ru(bpy)<sub>3</sub>Cl<sub>2</sub></b><br>$E_{1/2}(M^*/M^-) = 0.77 \text{ V vs SCE}^1$ | <5                     | 6     | <br><b>1e Ir(ppy)<sub>2</sub>(dtbbpy)PF<sub>6</sub></b><br>$E_{1/2}(M^*/M^-) = 0.66 \text{ V vs SCE}^1$                                 | <5                     |
| 3                                                                                  | <br><b>1b rose bengal</b><br>$E_{1/2}(M^*/M^-) = 0.99 \text{ V vs SCE}^2$                     | 7                      | 7     | <br><b>1f</b><br><b>[Ir(dF(CF<sub>3</sub>)ppy)<sub>2</sub>(dtbbpy)]BF<sub>4</sub></b><br>$E_{1/2}(M^*/M^-) = 1.21 \text{ V vs SCE}^1$ | 68                     |
| 4                                                                                  | <br><b>1c eosin Y</b><br>$E_{1/2}(M^*/M^-) = 0.79 \text{ V vs SCE}^3$                         | <5                     | 8     | <br><b>1g</b><br><b>[Ir(dF(CF<sub>3</sub>)ppy)<sub>2</sub>(dtbbpy)]PF<sub>6</sub></b><br>$E_{1/2}(M^*/M^-) = 1.21 \text{ V vs SCE}^1$ | 75                     |

<sup>a</sup> Unless otherwise noted, the reaction conditions were as followed: dithiane **2a** (0.10 mmol), methyl acrylate **3a** (0.5 mmol), **photocatalyst** (1 mol%), anhydrous DMF (1.0 mL), 24 h, ambient temperature, irradiated with 23 W 6500K compact fluorescent light under N<sub>2</sub> atmosphere. <sup>b</sup> Yield determined by <sup>1</sup>H NMR analysis of unpurified reaction mixture using MeNO<sub>2</sub> as internal standard. Abbreviations: bpy, 2,2'-bipyridyl; ppy, 2-phenylpyridinyl; dtbbpy, 4,4'-di-*tert*-butyl-2,2'-dipyridyl; dF(CF<sub>3</sub>)ppy, 3,5-difluoro-5'-(trifluoromethyl)-2,2'-bipyridine.

**Table S2** Solvent screening.<sup>a</sup>

| entry | solvent           | yield (%) <sup>b</sup> | entry     | solvent    | yield (%) <sup>b</sup> |
|-------|-------------------|------------------------|-----------|------------|------------------------|
| 1     | hexane            | <5                     | 6         | THF        | <5                     |
| 2     | toluene           | <5                     | 7         | MeCN       | <5                     |
| 3     | Et <sub>2</sub> O | <5                     | 8         | MeOH       | <5                     |
| 4     | EtOAc             | <5                     | 9         | NMP        | 61                     |
| 5     | DCM               | <5                     | <b>10</b> | <b>DMF</b> | <b>75</b>              |

<sup>a</sup> Unless otherwise noted, the reaction conditions were as followed: dithiane **2a** (0.10 mmol), methyl acrylate **3a** (0.5 mmol), **1g** (1 mol%), **solvent** (1.0 mL), 24 h, ambient temperature, irradiated with 23 W 6500K compact fluorescent light under N<sub>2</sub> atmosphere. <sup>b</sup> Yield determined by <sup>1</sup>H NMR analysis of unpurified reaction mixture using MeNO<sub>2</sub> as internal standard. Abbreviations: DCM, dichloromethane; THF, tetrahydrofuran; NMP, *N*-methyl-2-pyrrolidone; DMF, dimethylformamide.

**Table S3** Control experiments.<sup>a</sup>

| entry          | atm.           | additive | light     | yield (%) <sup>b</sup> | entry | atm.           | additive                                  | light    | yield (%) <sup>b</sup> |
|----------------|----------------|----------|-----------|------------------------|-------|----------------|-------------------------------------------|----------|------------------------|
| 1              | O <sub>2</sub> | —        | 23 W CFL  | <5                     | 4     | N <sub>2</sub> | H <sub>2</sub> O (1 equiv.)               | 23 W CFL | <5                     |
| 2 <sup>c</sup> | N <sub>2</sub> | —        | dark      | <5                     | 5     | N <sub>2</sub> | Et <sub>3</sub> N (1 equiv.)              | 23 W CFL | <5                     |
| 3 <sup>d</sup> | N <sub>2</sub> | —        | 13 W LEDs | 71                     | 6     | N <sub>2</sub> | K <sub>2</sub> CO <sub>3</sub> (1 equiv.) | 23 W CFL | 59                     |

<sup>a</sup> Unless otherwise noted, the reaction conditions were as followed: dithiane **2a** (0.10 mmol), methyl acrylate **3a** (0.5 mmol), **1g** (1 mol%), **additive**, anhydrous DMF (1.0 mL), 24 h, ambient temperature, irradiated with a **light** source under **designated atmosphere**. <sup>b</sup> Yield determined by <sup>1</sup>H NMR analysis of unpurified reaction mixture using MeNO<sub>2</sub> as internal standard. <sup>c</sup> Reaction conducted in dark at 40 °C. <sup>d</sup> Philips LED bulb 13W E27 (UV/IR free) was used.

### 2.3. Synthesis for starting materials

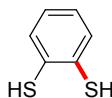

benzene-1,2-dithiol (**S1**)<sup>4</sup>: Synthesized according to literature procedure from thiophenol.

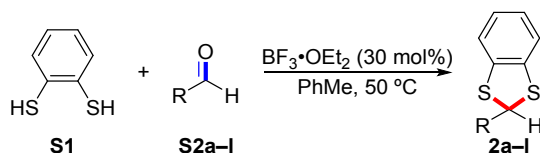

**General procedure for the preparation of dithiane derivatives 2:** To a solution of corresponding aldehyde **S2** (2.0 mmol, 1.0 equiv.) and dithiol **S1** (2.2 mmol, 1.1 equiv) in toluene (5.0 mL),  $\text{BF}_3 \cdot \text{OEt}_2$  (30 mol%) was added at room temperature. The reaction was stirred at 50 °C and monitored by TLC. Saturated aqueous  $\text{NaHCO}_3$  was added after completion of reaction (2 h). Organic layer was washed with saturated brine solution, dried over  $\text{Na}_2\text{SO}_4$ , concentrated and purified by column chromatography using hexane and EtOAc as eluents.

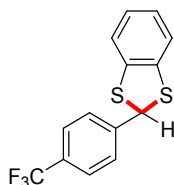

**2-(4-(trifluoromethyl)phenyl)benzo[d][1,3]dithiole (2c):**  $^1\text{H}$  NMR (400 MHz,  $\text{CDCl}_3$ )  $\delta$  7.64 – 7.61 (m, 2H), 7.57 – 7.55 (m, 2H), 7.23 – 7.20 (m, 2H), 7.08 – 7.06 (m, 2H), 6.09 (s, 1H) ppm;  $^{13}\text{C}$  NMR (100 MHz,  $\text{CDCl}_3$ )  $\delta$  144.5, 136.9, 130.7 (q,  $J = 32.3$  Hz), 127.3, 126.0, 125.7 (q,  $J = 3.8$  Hz), 123.8 (q,  $J = 270.6$  Hz), 122.0, 55.3 ppm.

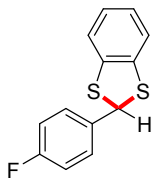

**2-(4-fluorophenyl)benzo[d][1,3]dithiole (2d):**  $^1\text{H}$  NMR (400 MHz,  $\text{CDCl}_3$ )  $\delta$  7.53 – 7.49 (m, 2H), 7.20 – 7.18 (m, 2H), 7.06 – 6.96 (m, 4H), 6.15 (s, 1H) ppm;  $^{13}\text{C}$  NMR (100 MHz,  $\text{CDCl}_3$ )  $\delta$  162.7 (d,  $J = 246.7$  Hz), 137.3, 135.8 (d,  $J = 3.2$  Hz), 128.9 (d,  $J = 8.2$  Hz), 125.9, 121.9, 115.6 (d,  $J = 21.6$  Hz), 55.8 ppm.

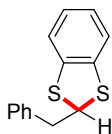

**2-benzylbenzo[d][1,3]dithiole (2g):**  $^1\text{H}$  NMR (400 MHz,  $\text{CDCl}_3$ )  $\delta$  7.39 – 7.26 (m, 7H), 7.09 – 7.07 (m, 2H), 5.05 (t,  $J = 7.0$  Hz, 1H), 3.26 (d,  $J = 7.4$  Hz, 2H) ppm;  $^{13}\text{C}$  NMR (100 MHz,  $\text{CDCl}_3$ )  $\delta$  137.6, 137.2, 129.5, 128.5, 128.5, 127.1, 125.6, 122.7, 55.7, 45.1 ppm.

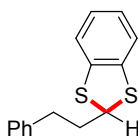

**2-phenethylbenzo[*d*][1,3]dithiole (2h):**  $^1\text{H}$  NMR (400 MHz,  $\text{CDCl}_3$ )  $\delta$  7.35 – 7.20 (m, 7H), 7.08 – 7.06 (m, 2H), 4.79 (t,  $J = 7.2$  Hz, 1H), 2.86 – 2.82 (m, 2H), 2.32 – 2.26 (m, 2H) ppm;  $^{13}\text{C}$  NMR (100 MHz,  $\text{CDCl}_3$ )  $\delta$  140.4, 137.3, 128.6, 126.6, 125.5, 122.6, 53.7, 40.8, 33.0 ppm.

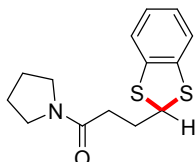

**3-(benzo[*d*][1,3]dithiol-2-yl)-1-(pyrrolidin-1-yl)propan-1-one (2i):**  $^1\text{H}$  NMR (400 MHz,  $\text{CDCl}_3$ )  $\delta$  7.24 – 7.21 (m, 2H), 7.04 – 7.01 (m, 2H), 4.98 (t,  $J = 7.1$  Hz, 1H), 3.44 (t,  $J = 10.1$  Hz, 2H), 3.37 (t,  $J = 6.8$  Hz, 2H), 2.47 (t,  $J = 7.0$  Hz, 2H), 2.26 (q,  $J = 7.0$  Hz, 2H), 1.96 – 1.93 (m, 2H), 1.88 – 1.82 (m, 2H) ppm;  $^{13}\text{C}$  NMR (100 MHz,  $\text{CDCl}_3$ )  $\delta$  169.9, 137.1, 125.4, 122.5, 53.7, 46.5, 45.7, 34.2, 31.0, 26.0, 24.4 ppm.

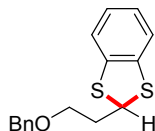

**2-(2-(benzyloxy)ethyl)benzo[*d*][1,3]dithiole (2j):**  $^1\text{H}$  NMR (400 MHz,  $\text{CDCl}_3$ )  $\delta$  7.36 – 7.30 (m, 5H), 7.29 – 7.19 (m, 2H), 7.01 – 6.99 (m, 2H), 5.03 (t,  $J = 6.9$  Hz, 1H), 4.49 (s, 2H), 3.60 (t,  $J = 5.6$  Hz), 2.21 – 2.16 (m, 2H) ppm;  $^{13}\text{C}$  NMR (100 MHz,  $\text{CDCl}_3$ )  $\delta$  137.1, 128.4, 127.70, 127.65, 125.4, 122.6, 73.1, 66.7, 51.3, 39.3 ppm.

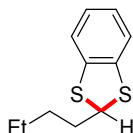

**2-butylbenzo[*d*][1,3]dithiole (2k):**  $^1\text{H}$  NMR (400 MHz,  $\text{CDCl}_3$ )  $\delta$  7.26 – 7.19 (m, 2H), 7.02 – 6.99 (m, 2H), 4.85 (t,  $J = 7.2$  Hz, 1H), 1.97 – 1.91 (m, 2H), 1.45, 1.45, 1.44 – 1.40 (m, 2H), 1.35 – 1.29 (m, 2H), 0.90 (t,  $J = 7.3$  Hz, 3H) ppm;  $^{13}\text{C}$  NMR (100 MHz,  $\text{CDCl}_3$ )  $\delta$  137.4, 125.3, 122.4, 54.7, 38.8, 29.3, 22.1, 13.9 ppm.

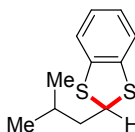

**2-isobutylbenzo[*d*][1,3]dithiole (2l):**  $^1\text{H}$  NMR (400 MHz,  $\text{CDCl}_3$ )  $\delta$  7.21 – 7.19 (m, 2H), 7.02 – 6.99 (m, 2H), 4.96 (t,  $J = 7.5$  Hz, 1H), 1.86 – 1.84 (m, 3H), 0.93 – 0.91 (m, 6H) ppm;  $^{13}\text{C}$  NMR (100 MHz,  $\text{CDCl}_3$ )  $\delta$  137.5, 125.4, 122.5, 53.1, 47.4, 26.3, 22.1 ppm.

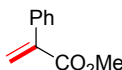

**methyl 2-phenylacrylate (3d)**<sup>5</sup>: Synthesized according to literature procedure from methyl 2-phenylacetate.

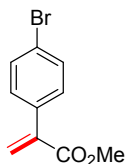

**methyl 2-(4-bromophenyl)acrylate (3e)**<sup>5</sup>: Synthesized according to literature procedure from methyl 2-(4-bromophenyl)acetate.

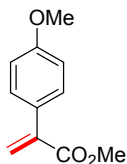

**methyl 2-(4-methoxyphenyl)acrylate (3f)**<sup>5</sup>: Synthesized according to literature procedure from methyl 2-(4-methoxyphenyl)acetate.

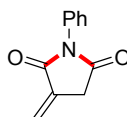

**3-methylene-1-phenylpyrrolidine-2,5-dione (3i)**<sup>6</sup>: Synthesized according to literature procedure from itaconic anhydride and aniline.



## 2.4. General procedure for photocatalytic direct intermolecular addition of various 1,3-dithiane derivatives with methyl acrylate

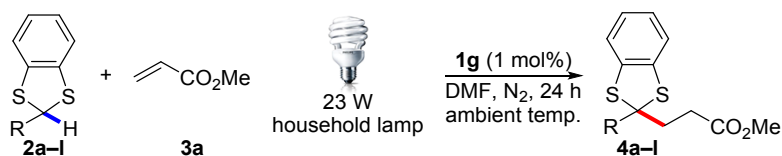

A 30 mL oven dried Schlenk tube (with PTFE-lined screw cap and a side arm) equipped with a magnetic stir bar was charged with dithiane **2** (0.10 mmol, 1.0 equiv.), methyl acrylate (0.2 mmol), and photocatalyst **1g** (1.2 mg, 0.0010 mmol, 1.0 mol%). Dry DMF (1.0 mL) was used to wash down the solids on the sides of wall under N<sub>2</sub> atmosphere. The tube was sealed, evacuated, and backfilled with nitrogen gas repeatedly for three times. It was then placed approximately 2 cm from the light source (23 W 6500K CFL). After stirring for 24 h, the resulting mixture was concentrated *in vacuo* at 50 °C, and the resulting residue was purified by column chromatography or preparative TLC using hexanes/EtOAc as the eluent.

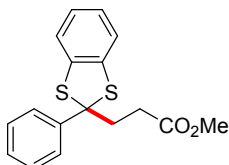

**methyl 3-(2-phenylbenzo[*d*][1,3]dithiol-2-yl)propanoate (4a):** <sup>1</sup>H NMR (400 MHz, CDCl<sub>3</sub>) δ 7.62 – 7.60 (m, 2H), 7.37 – 7.26 (m, 3H), 7.21 – 7.19 (m, 2H), 7.03 – 7.01 (m, 2H), 3.57 (s, 3H), 2.80 – 2.76 (m, 2H), 2.42 – 2.38 (m, 2H) ppm; <sup>13</sup>C NMR (100 MHz, CDCl<sub>3</sub>) δ 172.9, 140.3, 137.6, 128.5, 128.1, 126.8, 125.8, 122.6, 51.7, 39.6, 30.9 ppm; IR (film): 2965, 1734, 1541, 1445 cm<sup>-1</sup>; HRMS(*m/z*, ESI): Calcd for C<sub>17</sub>H<sub>16</sub>O<sub>2</sub>S<sub>2</sub>Na<sup>+</sup> [M+Na<sup>+</sup>] 339.0489, found 339.0486.

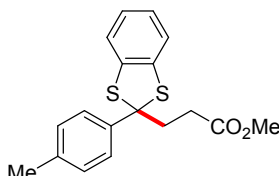

**methyl 3-(2-(*p*-tolyl)benzo[*d*][1,3]dithiol-2-yl)propanoate (4b):** <sup>1</sup>H NMR (400 MHz, CDCl<sub>3</sub>) δ 7.50 – 7.48 (m, 2H), 7.20 – 7.13 (m, 2H), 7.03 – 7.00 (m, 2H), 3.57 (s, 3H), 2.78 – 2.74 (m, 2H), 2.42 – 2.38 (m, 2H), 2.32 (s, 3H) ppm; <sup>13</sup>C NMR (100 MHz, CDCl<sub>3</sub>) δ 173.0, 138.0, 137.7, 137.1, 129.2, 126.7, 125.7, 122.6, 74.2, 51.7, 39.5, 30.9, 21.0 ppm; IR (film): 2957, 1734, 1557 cm<sup>-1</sup>; HRMS(*m/z*, ESI): Calcd for C<sub>18</sub>H<sub>18</sub>O<sub>2</sub>S<sub>2</sub>Na<sup>+</sup> [M+Na<sup>+</sup>] 353.0646, found 353.0637.

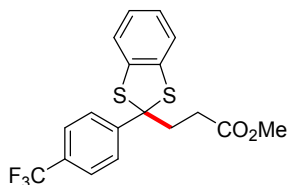

**methyl 3-(2-(4-(trifluoromethyl)phenyl)benzo[*d*][1,3]dithiol-2-yl)propanoate (4c):** <sup>1</sup>H NMR (400 MHz, CDCl<sub>3</sub>) δ 7.81 – 7.78 (m, 2H), 7.62 – 7.60 (m, 2H), 7.22 – 7.20 (m, 2H), 7.06 – 7.04 (m, 2H), 3.60 (s, 3H), 2.82 – 2.78 (m, 2H), 2.46 – 2.42 (m, 2H) ppm; <sup>13</sup>C NMR (100 MHz, CDCl<sub>3</sub>) δ 172.6, 145.3, 137.1, 130.2 (q, *J* = 28.9 Hz), 127.3, 126.0, 125.5 (q, *J* = 3.8 Hz), 123.8 (q, *J* = 270.9 Hz), 122.6, 73.8, 51.8, 38.8, 31.1 ppm; IR (film): 2951, 1771, 1541, 1362, 1235 cm<sup>-1</sup>; HRMS(*m/z*, ESI): Calcd for C<sub>18</sub>H<sub>15</sub>O<sub>2</sub>F<sub>3</sub>S<sub>2</sub>Na<sup>+</sup> [M+Na<sup>+</sup>] 407.0363, found 407.0365.

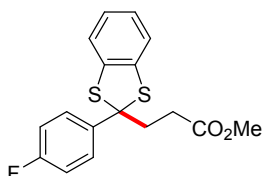

**methyl 3-(2-(4-fluorophenyl)benzo[*d*][1,3]dithiol-2-yl)propanoate (4d):**  $^1\text{H}$  NMR (400 MHz,  $\text{CDCl}_3$ )  $\delta$  7.64 – 7.61 (m, 2H), 7.20 – 7.18 (m, 2H), 7.04 – 7.00 (m, 2H), 3.59 (s, 3H), 2.79 – 2.75 (m, 2H), 2.44 – 2.40 (m, 2H) ppm;  $^{13}\text{C}$  NMR (100 MHz,  $\text{CDCl}_3$ )  $\delta$  172.8, 162.2 (d,  $J = 247.1$  Hz), 137.5, 136.5 (d,  $J = 3.2$  Hz), 128.7 (d,  $J = 8.2$  Hz), 125.9, 122.6, 115.3 (d,  $J = 21.6$  Hz), 73.7, 51.7, 39.2, 31.0 ppm; IR (film): 2951, 1735, 1489, 1234, 1164  $\text{cm}^{-1}$ ; HRMS( $m/z$ , ESI): Calcd for  $\text{C}_{17}\text{H}_{15}\text{O}_2\text{FS}_2\text{Na}^+$  [ $\text{M}+\text{Na}^+$ ] 357.0395, found 357.0386.

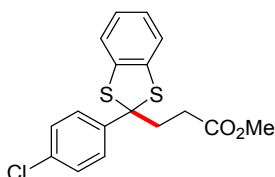

**methyl 3-(2-(4-chlorophenyl)benzo[*d*][1,3]dithiol-2-yl)propanoate (4e):**  $^1\text{H}$  NMR (400 MHz,  $\text{CDCl}_3$ )  $\delta$  7.61 – 7.59 (m, 2H), 7.33 – 7.31 (m, 2H), 7.21 – 7.19 (m, 2H), 7.05 – 7.03 (m, 2H), 3.61 (s, 3H), 2.79 – 2.75 (m, 2H), 2.44 – 2.41 (m, 2H) ppm;  $^{13}\text{C}$  NMR (100 MHz,  $\text{CDCl}_3$ )  $\delta$  172.7, 139.5, 137.3, 134.0, 128.6, 128.3, 125.9, 122.6, 73.7, 51.8, 39.0, 31.0 ppm; IR (film): 1734, 1541, 1315  $\text{cm}^{-1}$ ; HRMS( $m/z$ , ESI): Calcd for  $\text{C}_{17}\text{H}_{15}\text{O}_2\text{S}_2\text{ClNa}^+$  [ $\text{M}+\text{Na}^+$ ] 373.0100, found 373.0091.

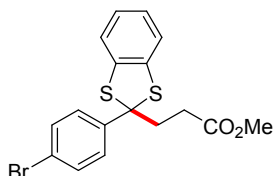

**methyl 3-(2-(4-bromophenyl)benzo[*d*][1,3]dithiol-2-yl)propanoate (4f):**  $^1\text{H}$  NMR (400 MHz,  $\text{CDCl}_3$ )  $\delta$  7.54 – 7.52 (m, 2H), 7.47 – 7.45 (m, 2H), 7.20 – 7.17 (m, 2H), 7.04 – 7.01 (m, 2H), 3.59 (s, 3H), 2.77 – 2.73 (m, 2H), 2.43 – 2.39 (m, 2H);  $^{13}\text{C}$  NMR (100 MHz,  $\text{CDCl}_3$ )  $\delta$  172.7, 140.1, 137.3, 131.5, 128.6, 125.9, 122.6, 122.2, 73.8, 51.8, 38.9, 31.0 ppm; IR (film): 2952, 1716, 1541, 1465, 1258  $\text{cm}^{-1}$ ; HRMS( $m/z$ , ESI): Calcd for  $\text{C}_{17}\text{H}_{15}\text{O}_2\text{S}_2\text{BrNa}^+$  [ $\text{M}+\text{Na}^+$ ] 416.9595, found 416.9588.

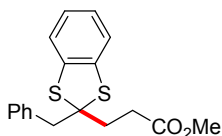

**methyl 3-(2-benzylbenzo[*d*][1,3]dithiol-2-yl)propanoate (4g):**  $^1\text{H}$  NMR (400 MHz,  $\text{CDCl}_3$ )  $\delta$  7.32 – 7.24 (m, 5H), 7.14 – 7.12 (m, 2H), 6.99 – 6.97 (m, 2H), 3.63 (s, 3H), 3.41 (s, 2H), 2.71 – 2.67 (m, 2H), 2.28 – 2.24 (m, 2H) ppm;  $^{13}\text{C}$  NMR (100 MHz,  $\text{CDCl}_3$ )  $\delta$  173.3, 137.8, 135.8, 130.8, 128.0, 127.3, 125.4, 122.3, 72.8, 51.7, 48.6, 35.1, 31.01 ppm; IR (film): 2951, 1734, 1541, 1197  $\text{cm}^{-1}$ ; HRMS( $m/z$ , ESI): Calcd for  $\text{C}_{18}\text{H}_{16}\text{O}_2\text{S}_2\text{Na}^+$  [ $\text{M}+\text{Na}^+$ ] 353.0646, found 353.0639.

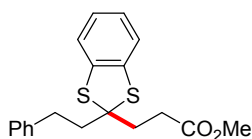

**methyl 3-(2-phenethylbenzo[*d*][1,3]dithiol-2-yl)propanoate (4h):**  $^1\text{H}$  NMR (400 MHz,  $\text{CDCl}_3$ )  $\delta$  7.30 – 7.25 (m, 2H), 7.20 – 7.14 (m, 5H), 7.02 – 6.99 (m, 2H), 3.67 (s, 3H), 2.90 – 2.86 (m, 2H), 2.70 – 2.66 (m, 2H), 2.42 – 2.33 (m, 4H) ppm;  $^{13}\text{C}$  NMR (100 MHz,  $\text{CDCl}_3$ )  $\delta$  173.3, 141.0, 137.7, 128.5, 128.4, 126.1, 125.4, 122.2, 72.2, 51.8, 44.4, 36.8, 32.5, 30.8 ppm; IR (film): 2950, 1736, 1445, 1258, 1194  $\text{cm}^{-1}$ ; HRMS( $m/z$ , ESI): Calcd for  $\text{C}_{19}\text{H}_{20}\text{O}_2\text{S}_2\text{Na}^+$  [ $\text{M}+\text{Na}^+$ ] 367.0802, found 367.0799.

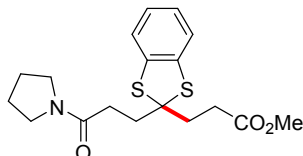

**methyl 3-(2-(3-oxo-3-(pyrrolidin-1-yl)propyl)benzo[*d*][1,3]dithiol-2-yl)propanoate (4i):**  $^1\text{H}$  NMR (400 MHz,  $\text{CDCl}_3$ )  $\delta$  7.12 – 7.10 (m, 2H), 6.99 – 6.96 (m, 2H), 3.64 (s, 3H), 3.43 (t,  $J = 6.0$  Hz, 2H), 3.35 (t,  $J = 6.0$  Hz, 2H), 2.66 – 2.59 (m, 4H), 2.38 – 2.32 (m, 2H), 1.92 – 1.87 (m, 2H), 1.83 – 1.78 (m, 2H) ppm;  $^{13}\text{C}$  NMR (100 MHz,  $\text{CDCl}_3$ )  $\delta$  173.3, 170.1, 137.7, 125.4, 122.2, 72.4, 51.8, 46.5, 45.8, 38.0, 36.1, 31.6, 30.6, 26.0, 24.4 ppm; IR (film): 2951, 1734, 1636, 1436, 1225, 1194  $\text{cm}^{-1}$ ; HRMS( $m/z$ , ESI): Calcd for  $\text{C}_{18}\text{H}_{24}\text{NO}_3\text{S}_2\text{Na}^+$  [ $\text{M}+\text{Na}^+$ ] 366.1198, found 366.1190.

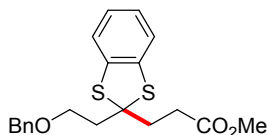

Alkene (5 equiv.) was used.

**methyl 3-(2-(2-(benzyloxy)ethyl)benzo[*d*][1,3]dithiol-2-yl)propanoate (4j):**  $^1\text{H}$  NMR (400 MHz,  $\text{CDCl}_3$ )  $\delta$  7.33 – 7.28 (m, 5H), 7.13 – 7.11 (m, 2H), 6.99 – 6.97 (m, 2H), 4.49 (s, 2H), 3.73 (t,  $J = 6.6$  Hz, 2H), 3.63 (s, 3H), 2.63 – 2.59 (m, 2H), 2.43 – 2.35 (m, 4H) ppm;  $^{13}\text{C}$  NMR (100 MHz,  $\text{CDCl}_3$ )  $\delta$  173.2, 137.7, 128.4, 127.6, 127.6, 125.4, 122.3, 73.2, 70.7, 67.3, 51.7, 40.8, 37.2, 30.7 ppm; IR (film): 1733, 1557, 1521, 1446, 1260  $\text{cm}^{-1}$ ; HRMS( $m/z$ , ESI): Calcd for  $\text{C}_{20}\text{H}_{22}\text{O}_3\text{S}_2\text{Na}^+$  [ $\text{M}+\text{Na}^+$ ] 397.0908, found 397.0903.

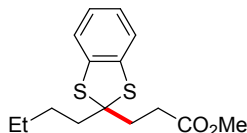

**methyl 3-(2-butylbenzo[*d*][1,3]dithiol-2-yl)propanoate (4k):**  $^1\text{H}$  NMR (400 MHz,  $\text{CDCl}_3$ )  $\delta$  7.12 – 7.10 (m, 2H), 6.98 – 6.96 (m, 2H), 3.64 (s, 3H), 2.62 – 2.58 (m, 2H), 2.33 – 2.29 (m, 2H), 2.08 – 2.04 (m, 2H), 1.53 – 1.46 (m, 2H), 1.33 (m, 2H), 0.90 (t,  $J = 7.3$  Hz, 3H) ppm;  $^{13}\text{C}$  NMR (100 MHz,  $\text{CDCl}_3$ )  $\delta$  173.4, 137.8, 125.3, 122.2, 72.5, 51.7, 41.7, 36.8, 30.7, 28.4, 22.7, 13.9 ppm; IR (film): 2956, 1735, 1557, 1445, 1119  $\text{cm}^{-1}$ ; HRMS( $m/z$ , ESI): Calcd for  $\text{C}_{15}\text{H}_{21}\text{O}_2\text{S}_2^+$  [ $\text{M}+\text{H}^+$ ] 297.0983, found 297.0976.



**2.5. General procedure for photocatalytic direct intermolecular addition of 1,3-dithiane with various electron-deficient alkenes**

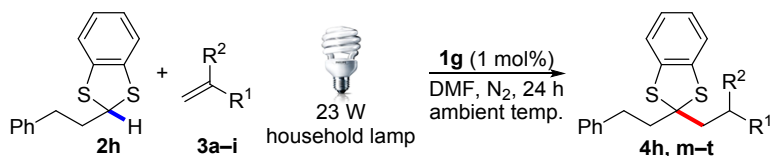

A 30 mL oven dried Schlenk tube (with PTFE-lined screw cap and a side arm) equipped with a magnetic stir bar was charged with dithiane **2h** (25.8 mg, 0.10 mmol, 1.0 equiv.), alkene **3** (0.2 mmol), and photocatalyst **1g** (1.2 mg, 0.0010 mmol, 1.0 mol%). Dry DMF (1.0 mL) was used to wash down the solids on the sides of wall under N<sub>2</sub> atmosphere. The tube was sealed, evacuated, and backfilled with nitrogen gas repeatedly for three times. It was then placed approximately 2 cm from the light source (23 W 6500K CFL). After stirring for 24 h, the resulting mixture was concentrated *in vacuo* at 50 °C, and the resulting residue was purified by column chromatography or preparative TLC using hexanes/EtOAc as the eluent.

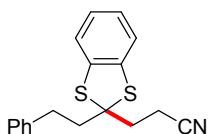

**3-(2-phenethylbenzo[*d*][1,3]dithiol-2-yl)propanenitrile (4m):** <sup>1</sup>H NMR (400 MHz, CDCl<sub>3</sub>) δ 7.28 – 7.24 (m, 2H), 7.21 – 7.14 (m, 5H), 7.04 – 7.02 (m, 2H), 2.91 – 2.87 (m, 2H), 2.72 – 2.68 (m, 2H), 2.39 – 2.32 (m, 4H) ppm; <sup>13</sup>C NMR (100 MHz, CDCl<sub>3</sub>) δ 140.5, 137.0, 128.6, 128.4, 126.3, 125.8, 122.3, 119.2, 71.2, 43.9, 38.4, 32.7, 14.0 ppm; IR (film): 2946, 1734, 1535, 1258, 1008 cm<sup>-1</sup>; HRMS(*m/z*, ESI): Calcd for C<sub>18</sub>H<sub>18</sub>NS<sub>2</sub><sup>+</sup> [M+H<sup>+</sup>] 321.0881, found 321.0878.

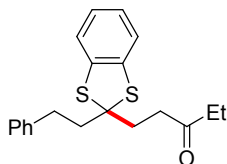

**1-(2-phenethylbenzo[*d*][1,3]dithiol-2-yl)pentan-3-one (4n):** <sup>1</sup>H NMR (400 MHz, CDCl<sub>3</sub>) δ 7.28 – 7.24 (m, 2H), 7.19 – 7.13 (m, 2H), 7.00 – 6.98 (m, 2H), 2.89 – 2.85 (m, 2H), 2.80 – 2.76 (m, 2H), 2.43 (q, *J* = 7.4 Hz, 2H), 2.35 – 2.31 (m, 4H), 1.04 (t, *J* = 7.3 Hz, 3H) ppm; <sup>13</sup>C NMR (100 MHz, CDCl<sub>3</sub>) δ 210.2, 141.1, 137.8, 128.5, 128.4, 126.1, 125.4, 122.2, 72.7, 45.2, 39.0, 36.1, 34.7, 32.3, 7.9 ppm; IR (film): 2951, 1733, 1557, 1456, 1287, 1091 cm<sup>-1</sup>; HRMS(*m/z*, ESI): Calcd for C<sub>20</sub>H<sub>23</sub>OS<sub>2</sub><sup>+</sup> [M+H<sup>+</sup>] 343.1190, found 343.1184.

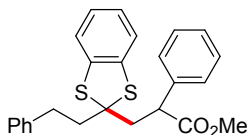

**methyl 3-(2-phenethylbenzo[*d*][1,3]dithiol-2-yl)-2-phenylpropanoate (4o):** <sup>1</sup>H NMR (400 MHz, CDCl<sub>3</sub>) δ 7.31 – 7.21 (m, 7H), 7.16 – 7.09 (m, 5H), 7.01 – 6.98 (m, 2H), 4.23 (dd, *J* = 3.2, 8.9 Hz, 1H), 3.64 (s, 3H), 3.18 (dd, *J* = 9.2, 15.0 Hz, 1H), 2.85 – 2.80 (m, 2H), 2.36 – 2.29 (m, 3H) ppm; <sup>13</sup>C NMR (100 MHz, CDCl<sub>3</sub>) δ 174.2, 141.1, 139.4, 138.0, 137.6, 128.9, 128.4, 127.8, 127.4, 126.0, 125.5, 122.5, 122.3, 72.8, 52.4, 49.1, 45.4, 43.3, 32.1 ppm; IR (film): 2950, 1733, 1445, 1197, 1161 cm<sup>-1</sup>; HRMS(*m/z*, ESI): Calcd for C<sub>25</sub>H<sub>24</sub>O<sub>2</sub>S<sub>2</sub>Na<sup>+</sup> [M+Na<sup>+</sup>] 443.1115, found 443.1111.

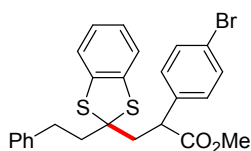

**methyl 2-(4-bromophenyl)-3-(2-phenethylbenzo[d][1,3]dithiol-2-yl)propanoate (4p):**  $^1\text{H}$  NMR (400 MHz,  $\text{CDCl}_3$ )  $\delta$  7.45 – 7.42 (m, 2H), 7.25 – 7.23 (m, 2H), 7.19 – 7.10 (m, 7H), 7.02 – 7.00 (m, 2H), 4.20 (dd,  $J = 3.7, 8.7$  Hz, 1H), 3.64 (s, 3H), 3.14 (dd,  $J = 8.6, 15.0$  Hz, 1H), 2.86 – 2.81 (m, 2H), 2.33 – 2.27 (m, 3H) ppm;  $^{13}\text{C}$  NMR (100 MHz,  $\text{CDCl}_3$ )  $\delta$  173.8, 140.9, 138.4, 137.8, 137.5, 131.9, 129.6, 128.4, 128.4, 126.0, 125.5, 122.5, 122.3, 121.5, 72.6, 52.5, 48.5, 45.3, 43.4, 32.1 ppm; IR (film): 2952, 1733, 1541, 1456, 1197  $\text{cm}^{-1}$ ; HRMS( $m/z$ , ESI): Calcd for  $\text{C}_{25}\text{H}_{23}\text{O}_2\text{S}_2\text{BrNa}^+$  [ $\text{M}+\text{Na}^+$ ] 521.0221, found 521.0214.

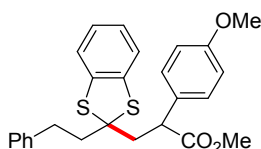

**methyl 2-(4-methoxyphenyl)-3-(2-phenethylbenzo[d][1,3]dithiol-2-yl)propanoate (4q):**  $^1\text{H}$  NMR (400 MHz,  $\text{CDCl}_3$ )  $\delta$  7.25 – 7.21 (m, 4H), 7.16 – 7.09 (m, 5H), 7.00 – 6.98 (m, 2H), 6.85 – 6.82 (m, 2H), 4.16 (dd,  $J = 3.4, 8.6$  Hz, 1H), 3.77 (s, 3H), 3.63 (s, 3H), 3.13 (dd,  $J = 8.6, 15.0$  Hz, 1H), 2.84 – 2.79 (m, 2H), 2.35 – 2.28 (m, 3H) ppm;  $^{13}\text{C}$  NMR (100 MHz,  $\text{CDCl}_3$ )  $\delta$  174.5, 158.9, 141.1, 138.0, 137.6, 131.4, 128.9, 128.4, 126.0, 125.5, 122.5, 122.3, 114.2, 72.8, 55.3, 52.4, 48.2, 45.3, 43.4, 32.0 ppm; IR (film): 1716, 1569, 1541, 1252  $\text{cm}^{-1}$ ; HRMS( $m/z$ , ESI): Calcd for  $\text{C}_{26}\text{H}_{26}\text{O}_3\text{S}_2\text{Na}^+$  [ $\text{M}+\text{Na}^+$ ] 473.1221, found 473.1213.

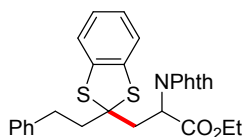

Alkene (1 equiv.) was used.

**ethyl 2-(1,3-dioxoisindolin-2-yl)-3-(2-phenethylbenzo[d][1,3]dithiol-2-yl)propanoate (4r):**  $^1\text{H}$  NMR (400 MHz,  $\text{CDCl}_3$ )  $\delta$  7.86 – 7.84 (m, 2H), 7.75 – 7.73 (m, 2H), 7.24 – 7.20 (m, 2H), 7.16 – 7.11 (m, 2H), 7.04 – 6.91 (m, 4H), 5.38 (dd,  $J = 2.8, 9.9$  Hz, 1H), 4.22 – 4.12 (m, 2H), 3.23 (dd,  $J = 9.8, 15.7$  Hz, 1H), 3.07 (dd,  $J = 2.8, 15.7$  Hz, 1H), 2.88 – 2.83 (m, 2H), 2.43 – 2.39 (m, 2H), 1.18 (t,  $J = 7.1$  Hz, 3H) ppm;  $^{13}\text{C}$  NMR (100 MHz,  $\text{CDCl}_3$ )  $\delta$  168.8, 167.5, 140.7, 137.6, 137.1, 134.2, 132.0, 128.4, 128.4, 126.1, 125.5, 125.5, 123.6, 122.5, 122.2, 71.2, 62.4, 49.8, 44.0, 38.3, 32.1, 14.0 ppm; IR (film): 1733, 1541, 1386, 1258  $\text{cm}^{-1}$ ; HRMS( $m/z$ , ESI): Calcd for  $\text{C}_{28}\text{H}_{26}\text{NO}_4^+$  [ $\text{M}+\text{H}^+$ ] 504.1303, found 504.1298.

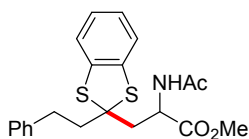

Alkene (1 equiv.) was used.

**methyl 2-acetamido-3-(2-phenethylbenzo[*d*][1,3]dithiol-2-yl)propanoate (4s):**  $^1\text{H}$  NMR (400 MHz,  $\text{CDCl}_3$ )  $\delta$  7.28 – 7.23 (m, 2H), 7.20 – 7.12 (m, 5H), 7.03 – 6.98 (m, 2H), 6.10 (d,  $J = 8.5$  Hz, 1H), 4.91 (td,  $J = 4.3, 8.7$  Hz, 1H), 3.73 (s, 3H), 2.89 – 2.83 (m, 2H), 2.71 (dd,  $J = 4.3, 15.1$  Hz, 1H), 2.57 (dd,  $J = 11.5, 16.3$  Hz, 1H), 2.45 – 2.39 (m, 2H), 2.00 (s, 3H) ppm;  $^{13}\text{C}$  NMR (100 MHz,  $\text{CDCl}_3$ )  $\delta$  172.2, 169.8, 140.6, 137.7, 136.8, 128.5, 128.4, 126.1, 125.7, 125.7, 122.4, 122.3, 70.6, 52.7, 50.2, 43.2, 42.5, 32.1, 23.3 ppm; IR (film): 3200, 2952, 1747, 1653, 1522, 1434, 1288, 1204  $\text{cm}^{-1}$ ; HRMS( $m/z$ , ESI): Calcd for  $\text{C}_{21}\text{H}_{24}\text{NO}_3\text{S}_2^+$  [ $\text{M}+\text{H}^+$ ] 402.1998, found 402.1993.

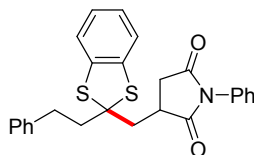

**3-((2-phenethylbenzo[*d*][1,3]dithiol-2-yl)methyl)-1-phenylpyrrolidine-2,5-dione (4t):**  $^1\text{H}$  NMR (400 MHz,  $\text{CDCl}_3$ )  $\delta$  7.47 – 7.35 (m, 3H), 7.30 – 7.23 (m, 5H), 7.21 – 7.17 (m, 4H), 7.06 – 7.02 (m, 2H), 3.51 – 3.44 (m, 1H), 3.06 – 2.89 (m, 5H), 2.51 – 2.36 (m, 2H), 2.26 – 2.20 (m, 1H) ppm;  $^{13}\text{C}$  NMR (100 MHz,  $\text{CDCl}_3$ )  $\delta$  178.4, 175.4, 140.7, 137.5, 131.8, 129.1, 128.6, 128.5, 128.4, 126.3, 126.2, 125.9, 125.8, 122.4, 122.3, 71.9, 45.0, 44.4, 38.6, 37.1, 32.7 ppm; IR (film): 1733, 1541, 1270, 1181  $\text{cm}^{-1}$ ; HRMS( $m/z$ , ESI): Calcd for  $\text{C}_{26}\text{H}_{23}\text{NO}_2\text{S}_2\text{Na}^+$  [ $\text{M}+\text{Na}^+$ ] 468.1068, found 468.1063.

## 2.6. Scalable photocatalytic direct intermolecular addition of 1,3-dithiane

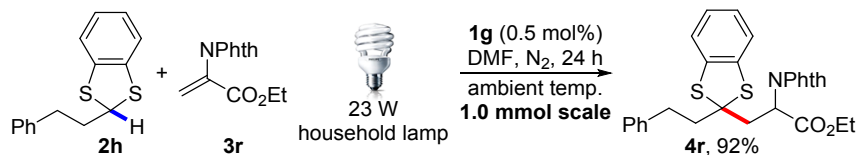

A 30 mL oven dried Schlenk tube (with PTFE-lined screw cap and a side arm) equipped with a magnetic stir bar was charged with dithiane **2h** (258 mg, 1.00 mmol, 1.0 equiv.), alkene **3r** (245 mg, 1.00 mmol, 1.0 equiv.), and photocatalyst **1g** (5.8 mg, 0.0050 mmol, 0.5 mol%). Dry DMF (4.0 mL) was used to wash down the solids on the sides of wall under N<sub>2</sub> atmosphere. The tube was sealed, evacuated, and backfilled with nitrogen gas repeatedly for three times. It was then placed approximately 2 cm from the light source (23 W 6500K CFL). After stirring for 24 h, the resulting mixture was concentrated *in vacuo* at 50 °C, and the resulting residue was purified by column chromatography using hexanes/EtOAc (5/1) as the eluent to give  $\alpha$ -amino acid derivative **4r** as a yellow solid (466 mg, 92% yield).



## 2.7. Procedure for deprotection of 1,3-dithiane

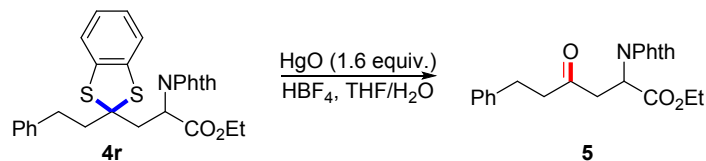

Amino acid derivative **4r** (252 mg, 0.500 mmol, 1.0 equiv.) was dissolved in THF (1.0 mL). The resulting solution was added to a suspension of HgO (173 mg, 0.800 mmol, 1.6 equiv.) in H<sub>2</sub>O (1.0 mL). This was followed by the addition of aqueous HBF<sub>4</sub> (0.20 mL, 0.2 M). After 15 h of stirring, solid NaHCO<sub>3</sub> was added until the solution turned basic on the pH scale. The reaction mixture was filtered through Celite and washed with diethyl ether. The filtrate was extracted with diethyl ether (2 × 3 mL). The combined organic phases were removed under reduced pressure to give the crude product. Purification by flash chromatography provided ketone **5** as the product (80% yield).

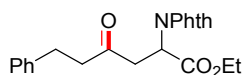

**ethyl 2-(1,3-dioxoisindolin-2-yl)-4-oxo-6-phenylhexanoate (5):** <sup>1</sup>H NMR (400 MHz, CDCl<sub>3</sub>) δ 7.85 – 7.83 (m, 2H), 7.73 – 7.71 (m, 2H), 7.23 – 7.19 (m, 2H), 7.15 – 7.12 (m, 3H), 5.47 (dd, *J* = 6.6, 7.6 Hz, 1H), 4.20 – 4.12 (m, 2H), 3.48 (dd, *J* = 6.4, 17.8 Hz, 1H), 3.13 (dd, *J* = 7.7, 17.8 Hz, 1H), 2.91 – 2.74 (m, 4H), 1.17 (t, *J* = 6.8 Hz, 3H) ppm; <sup>13</sup>C NMR (100 MHz, CDCl<sub>3</sub>) δ 205.4, 168.7, 167.3, 140.6, 134.2, 131.8, 128.4, 128.2, 126.1, 123.6, 62.2, 47.5, 44.3, 41.7, 29.4, 14.0 ppm; IR (film): 2910, 1716, 1541, 1418, 1100 cm<sup>-1</sup>; HRMS(*m/z*, ESI): Calcd for C<sub>22</sub>H<sub>21</sub>NO<sub>5</sub>Na<sup>+</sup> [M+Na<sup>+</sup>] 402.1317, found 402.1311.

## 2.8. Preliminary mechanistic studies

### Fluorescent quenching experiment

In a typical experiment, to a  $2.0 \times 10^{-6}$  M solution of photocatalyst **1g** in DMF was added the appropriate amount of quencher (dithiane **2c**) in a quartz cuvette. Then the solution was excited at 380 nm and the fluorescence emission intensity was collected at 480 nm. The readings were taken as an average of two runs.

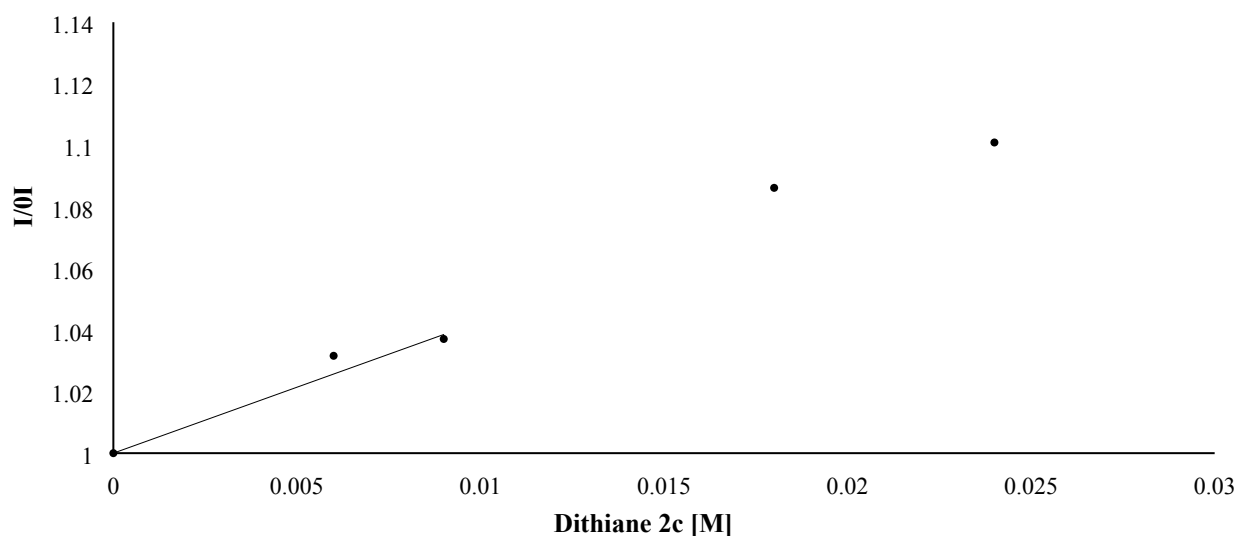

**Figure S2** Plot of fluorescence intensity of photocatalyst **1g** versus concentration of dithiane **2c**.

### Light/dark experiments

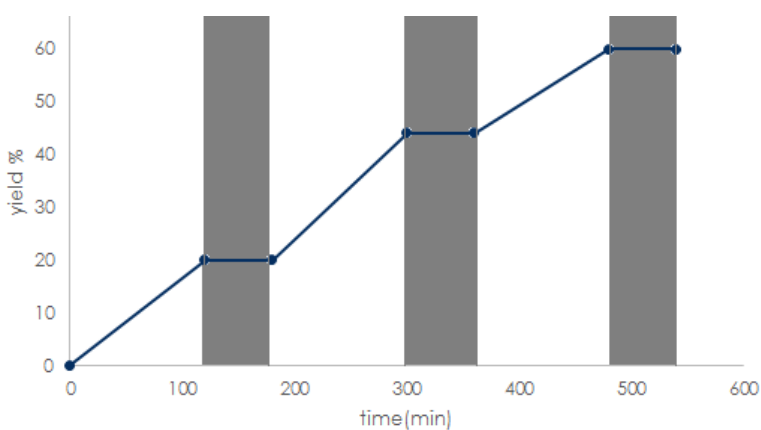

**Figure S3** Light/dark experiments.

### Inhibition of radical reaction by TEMPO

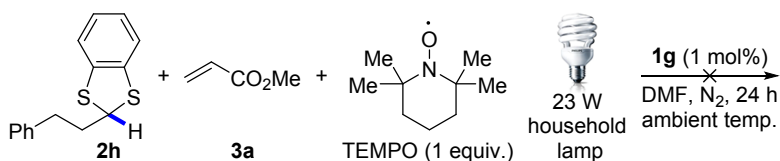

### 3. References

- 1 C. K. Prier, D. A. Rankic and D. W. C. MacMillan, *Chem. Rev.*, 2013, **113**, 5322.
- 2 D. Ravelli, M. Fagnoni and A. Albini, *Chem. Soc. Rev.*, 2013, **42**, 97.
- 3 D. DiRocco, <http://www.princeton.edu/chemistry/macmillan/resources/Merck-Photocatalysis-Chart.pdf>
- 4 D. M. Giolando and K. Kirschbaum, *Synthesis*, 1992, 451.
- 5 J. Pietruszka and M. Schölzel, *Adv. Synth. Catal.*, 2012, **354**, 751.
- 6 D. Leow, S. Lin, S. K. Chittimalla, X. Fu and C.-H. Tan, *Angew. Chem. Int. Ed.*, 2008, **47**, 5641.

## 4. NMR Spectra of New Compounds

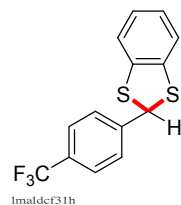

Imaldef31h

**2c**

7.6265  
7.6244  
7.6238  
7.6211  
7.6141  
7.6125  
7.6088  
7.5710  
7.5672  
7.5554  
7.5538  
7.5508  
7.5500  
7.5205  
7.5129  
7.5120  
7.5039  
7.4845  
7.4825  
7.4699  
7.4618  
-6.043

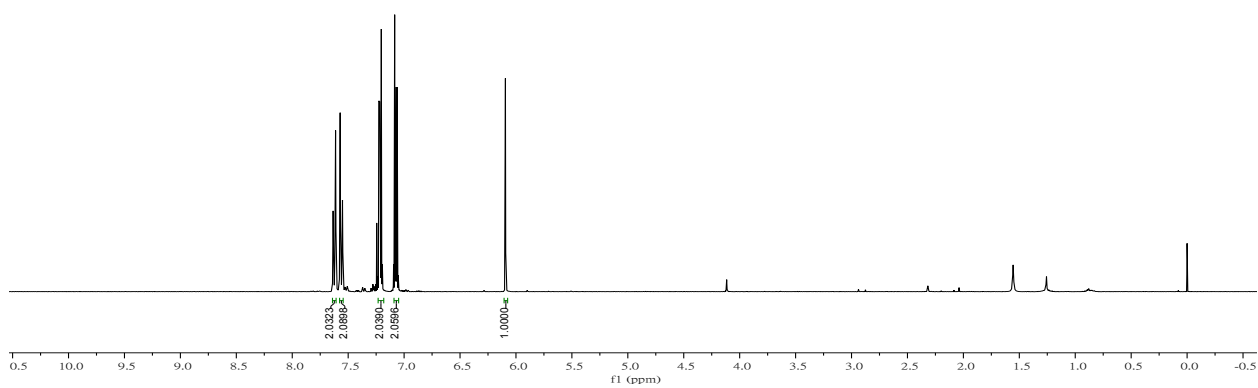

Imaldef313c

144.658  
144.4489  
136.8732  
136.8722  
130.5466  
130.3841  
129.0167  
128.9925  
128.9825  
128.0616  
127.2836  
125.7635  
125.7635  
125.7289  
125.6895  
125.1785  
122.6722  
122.6722  
55.2510  
12.2043

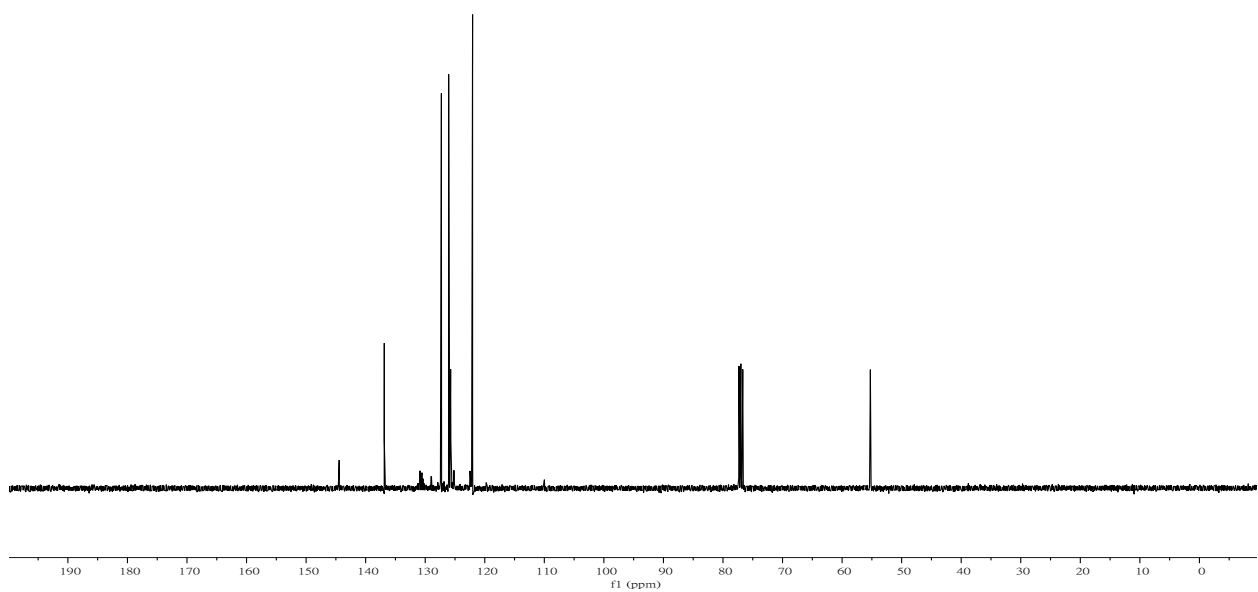

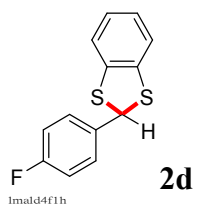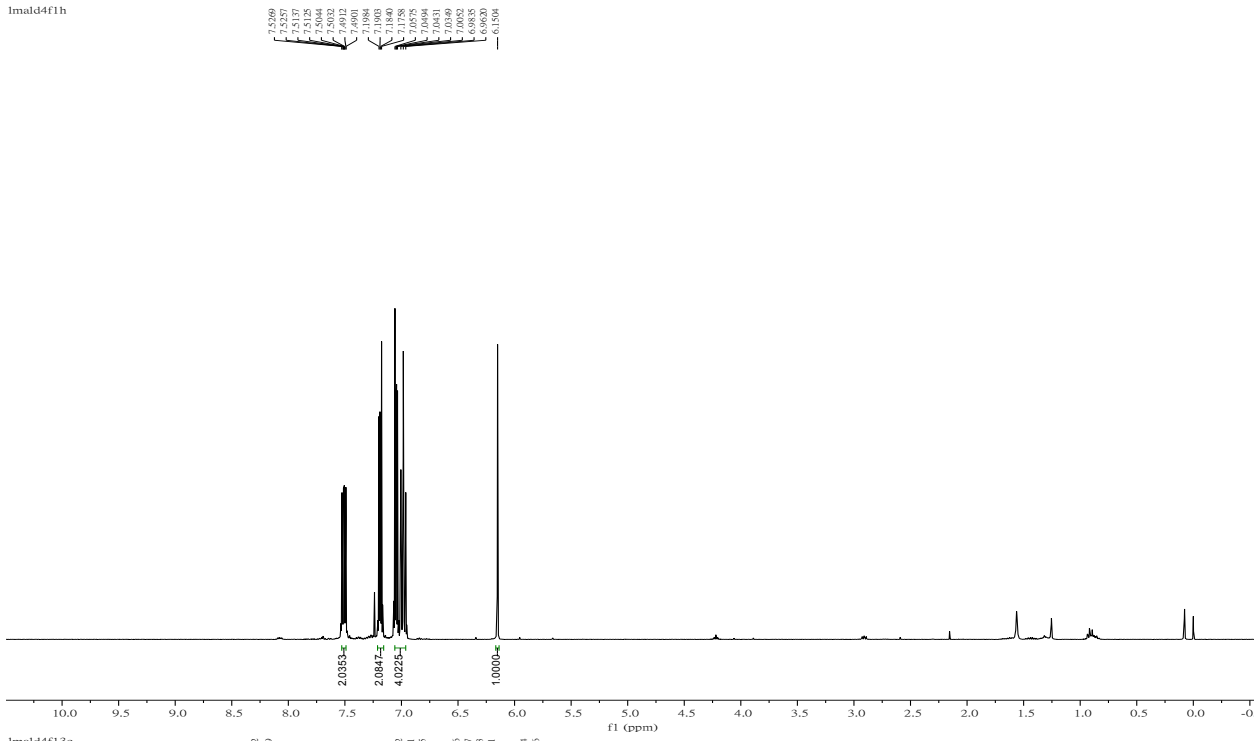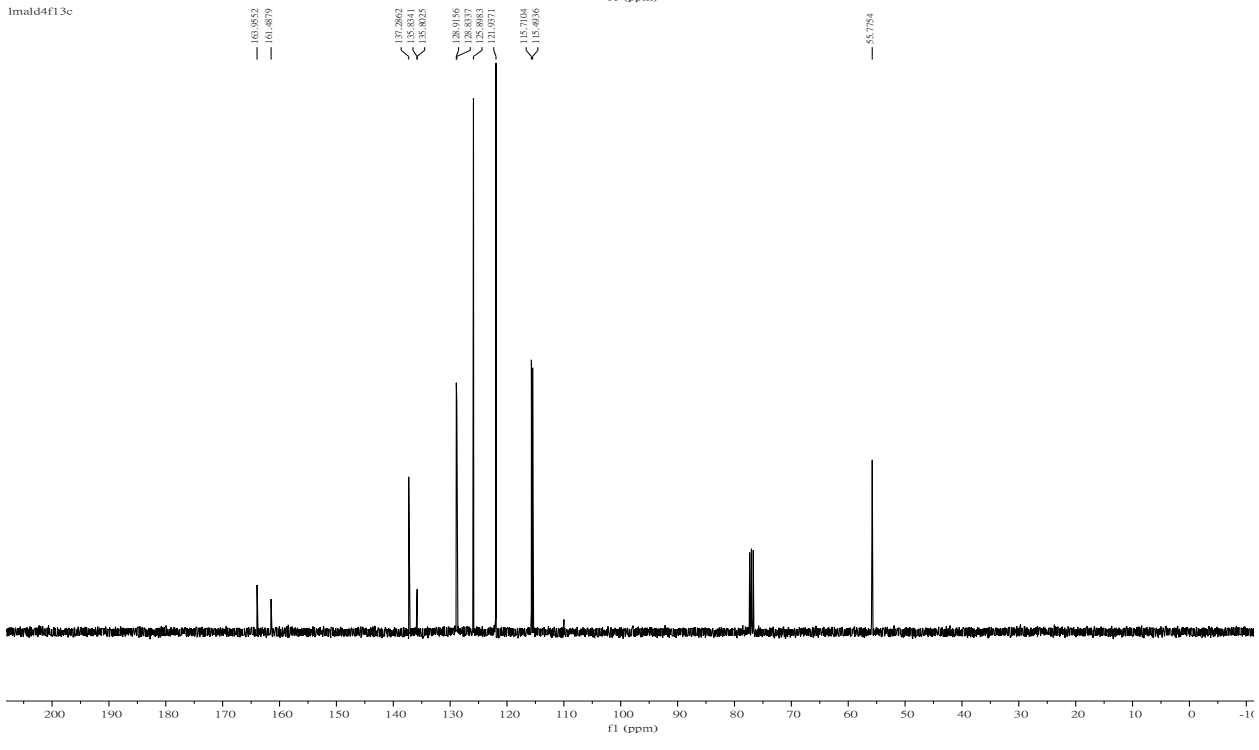

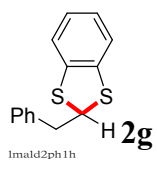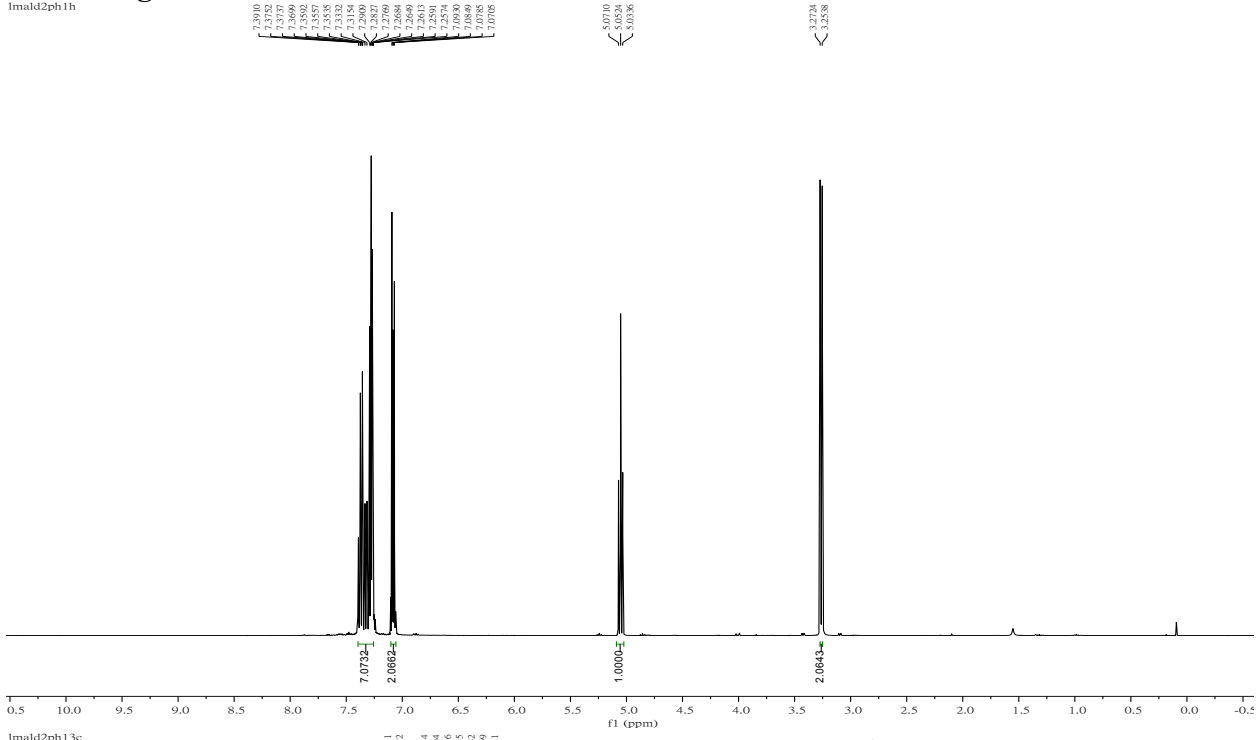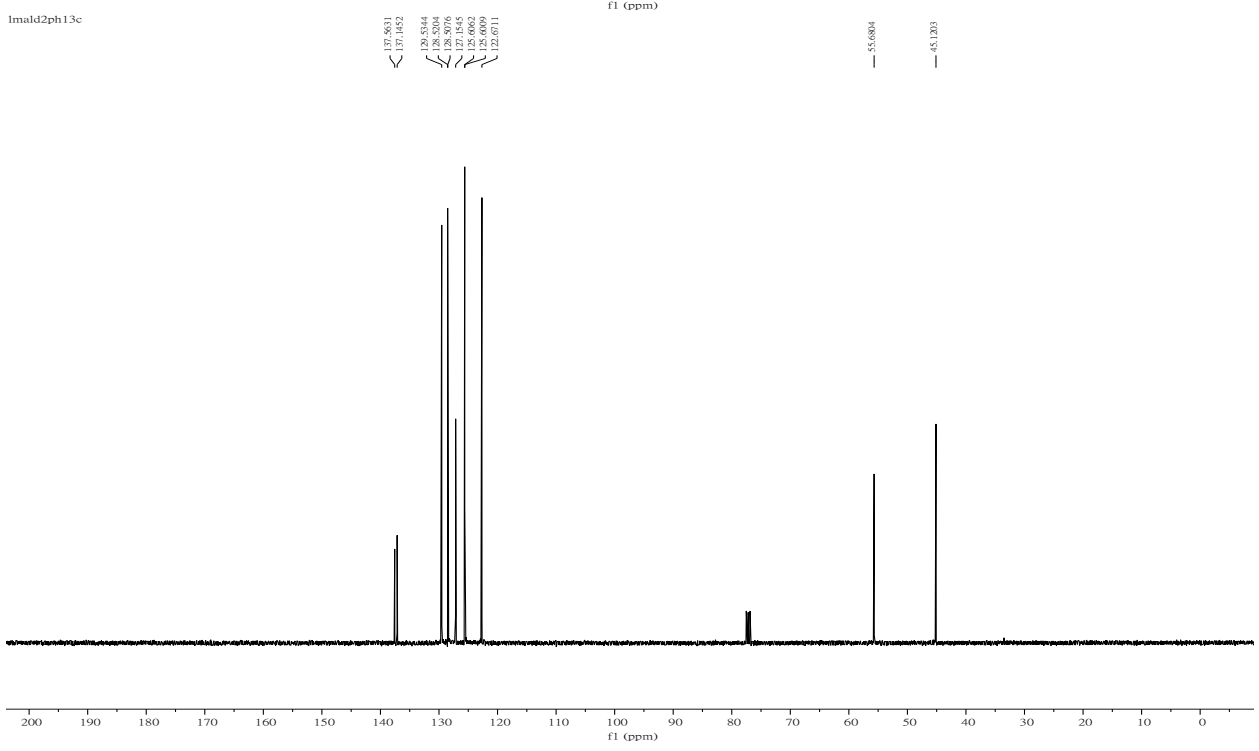

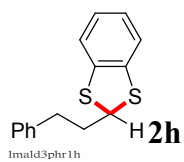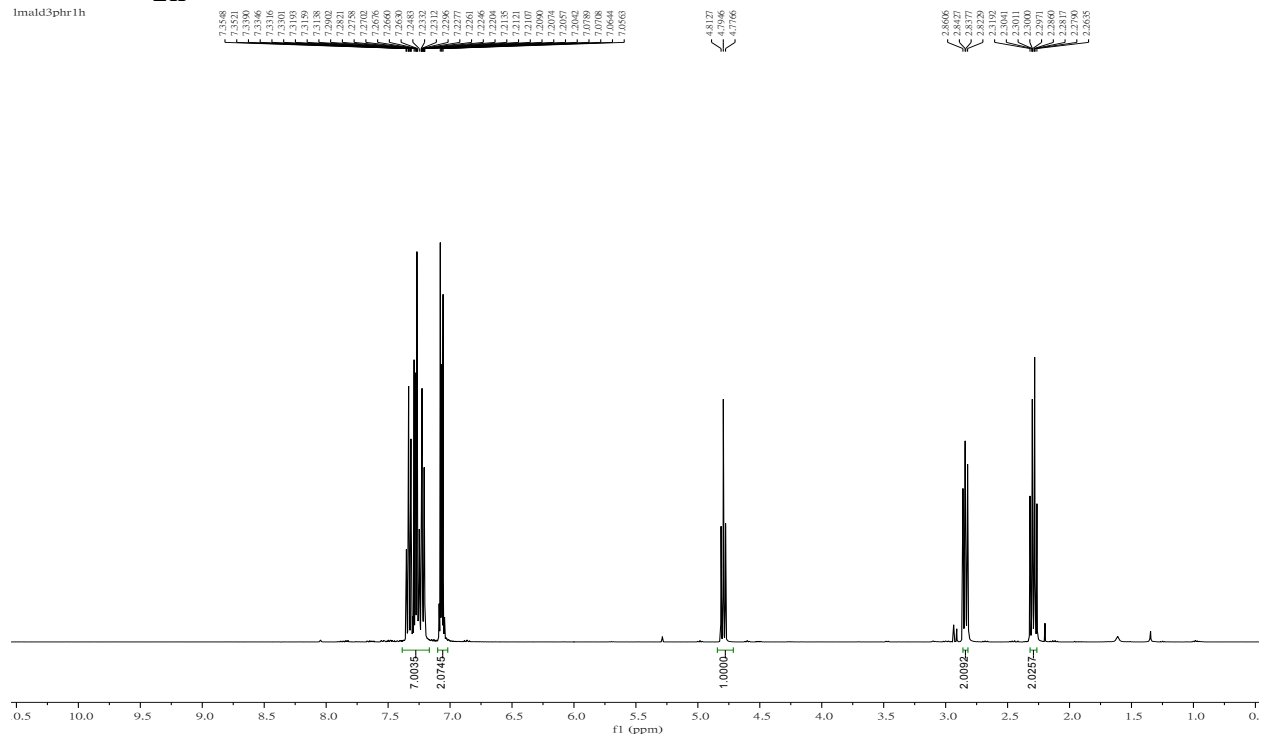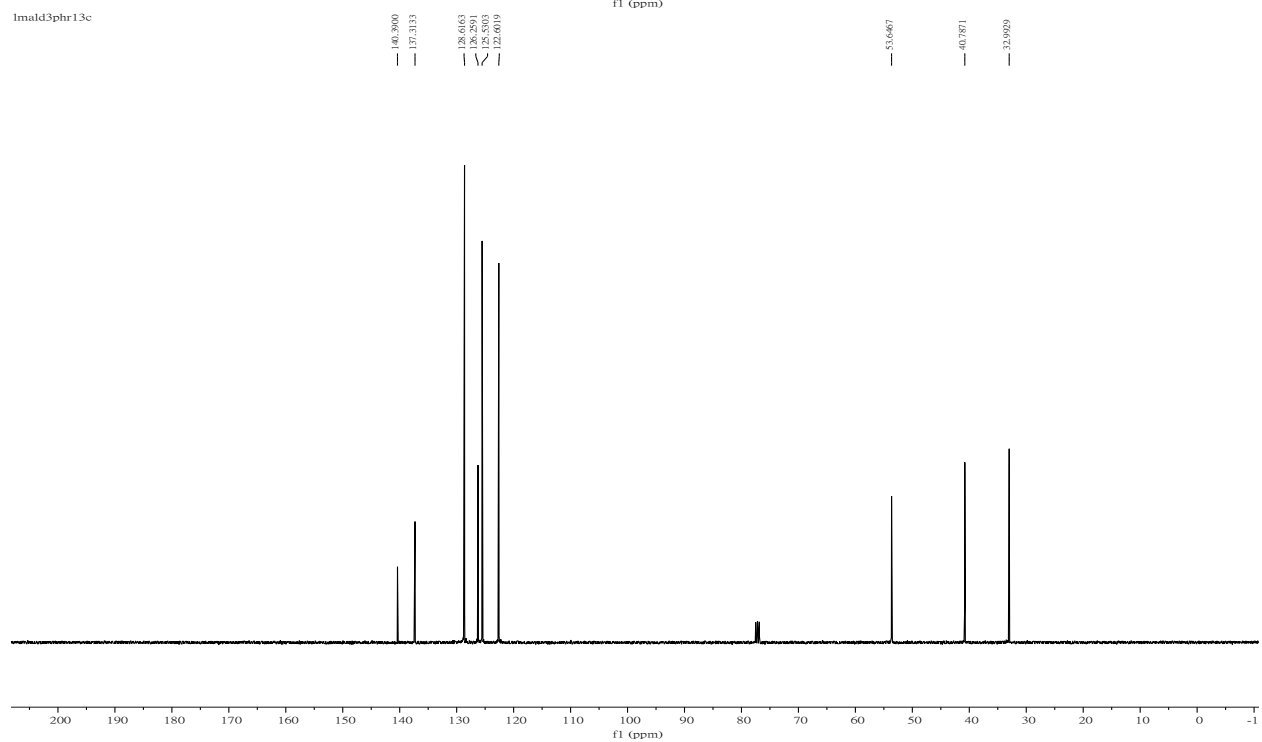

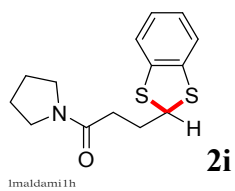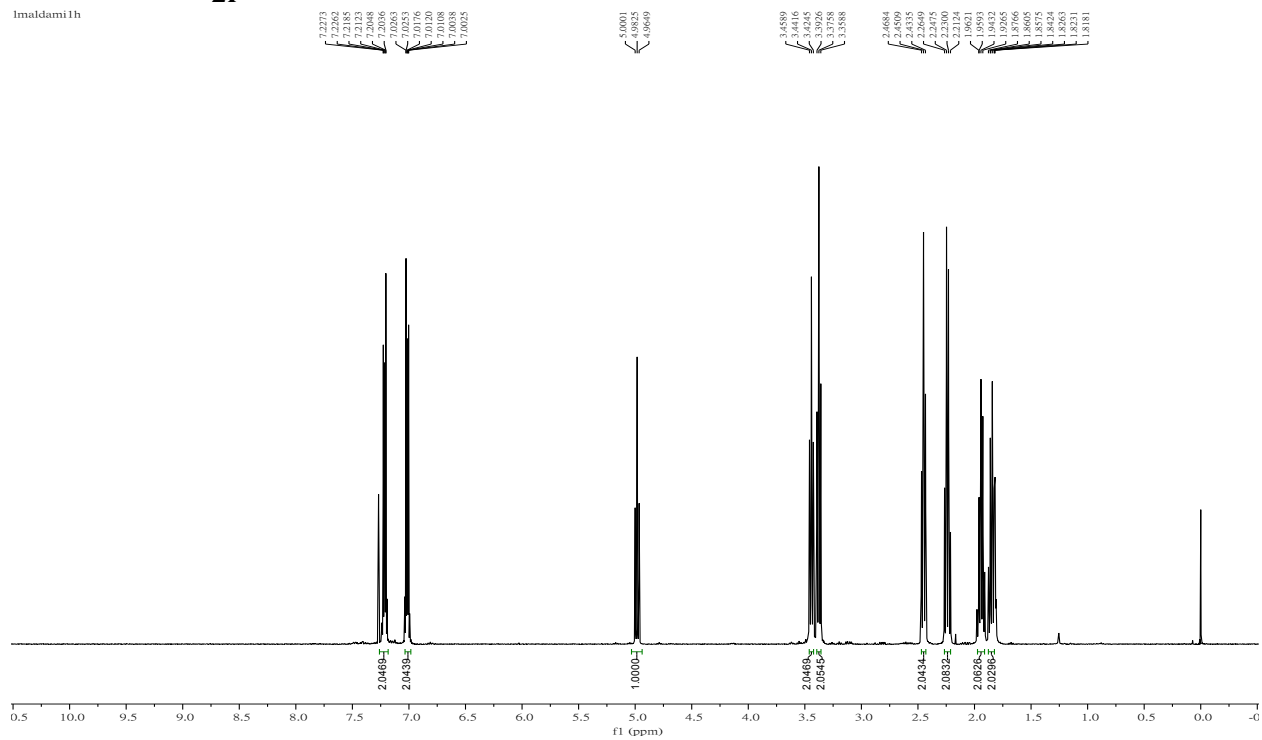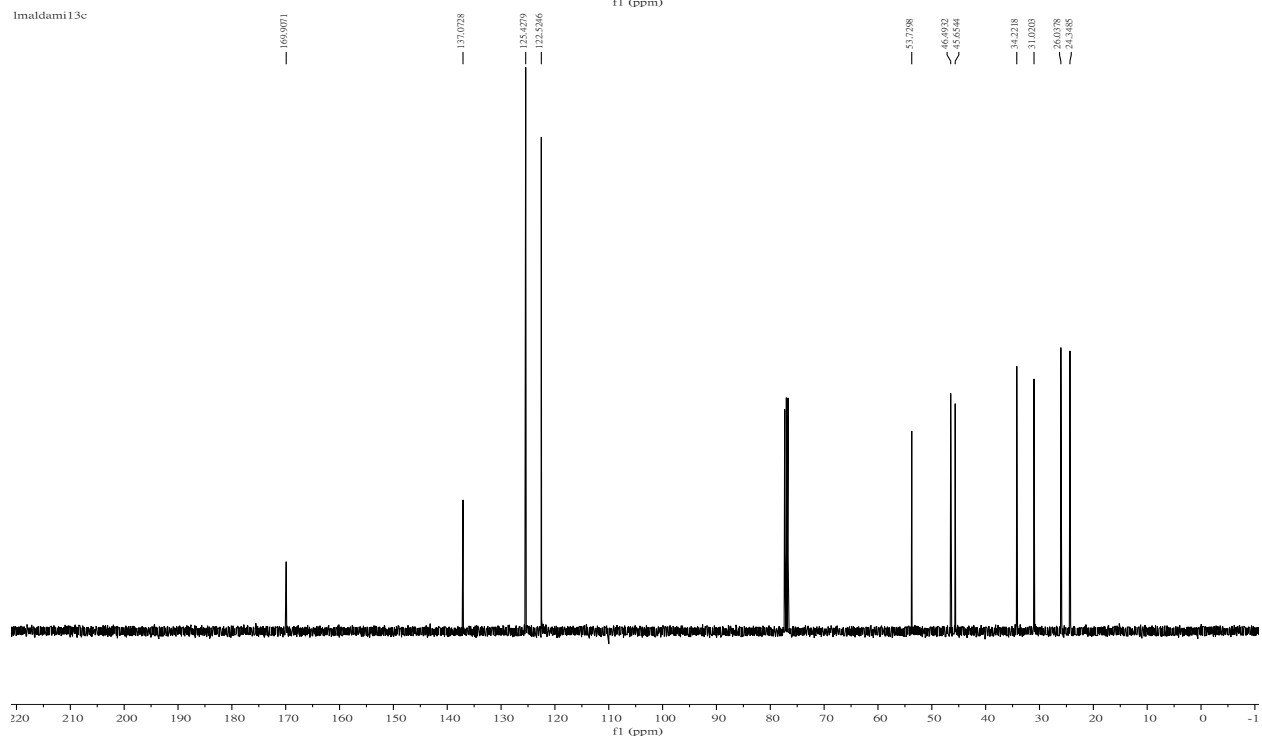



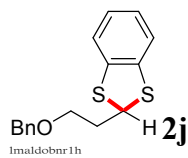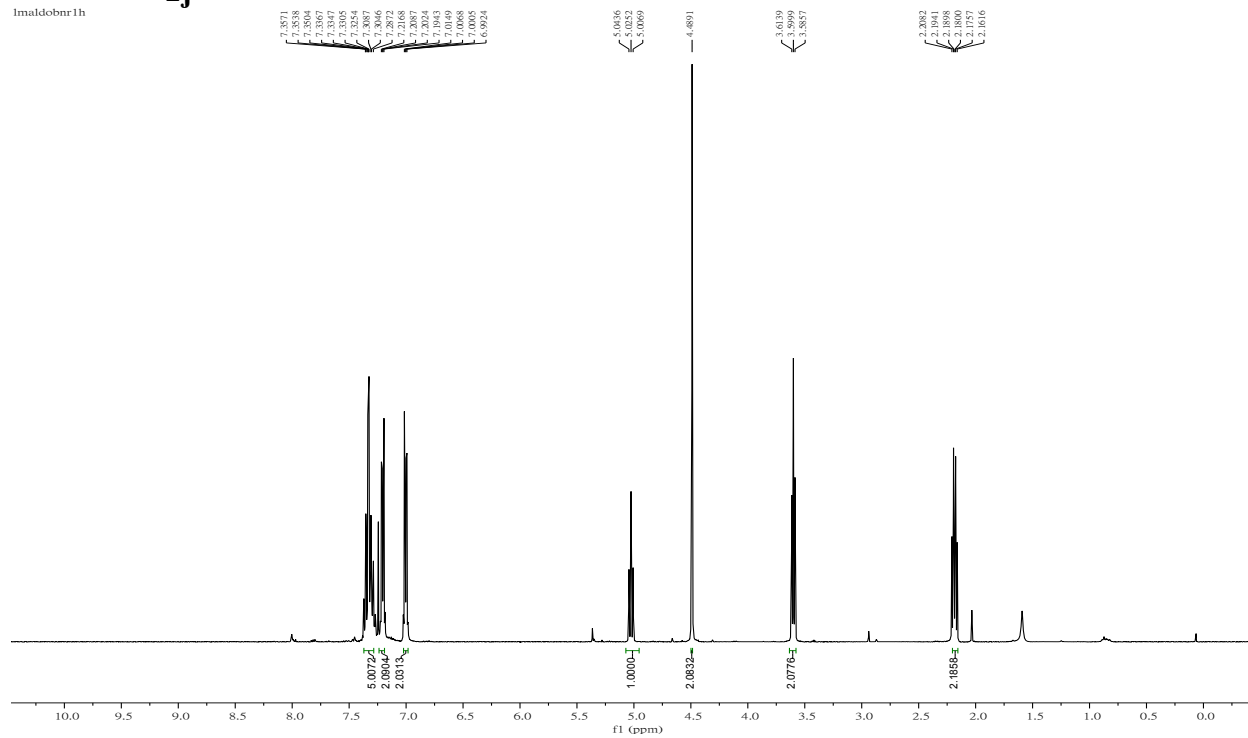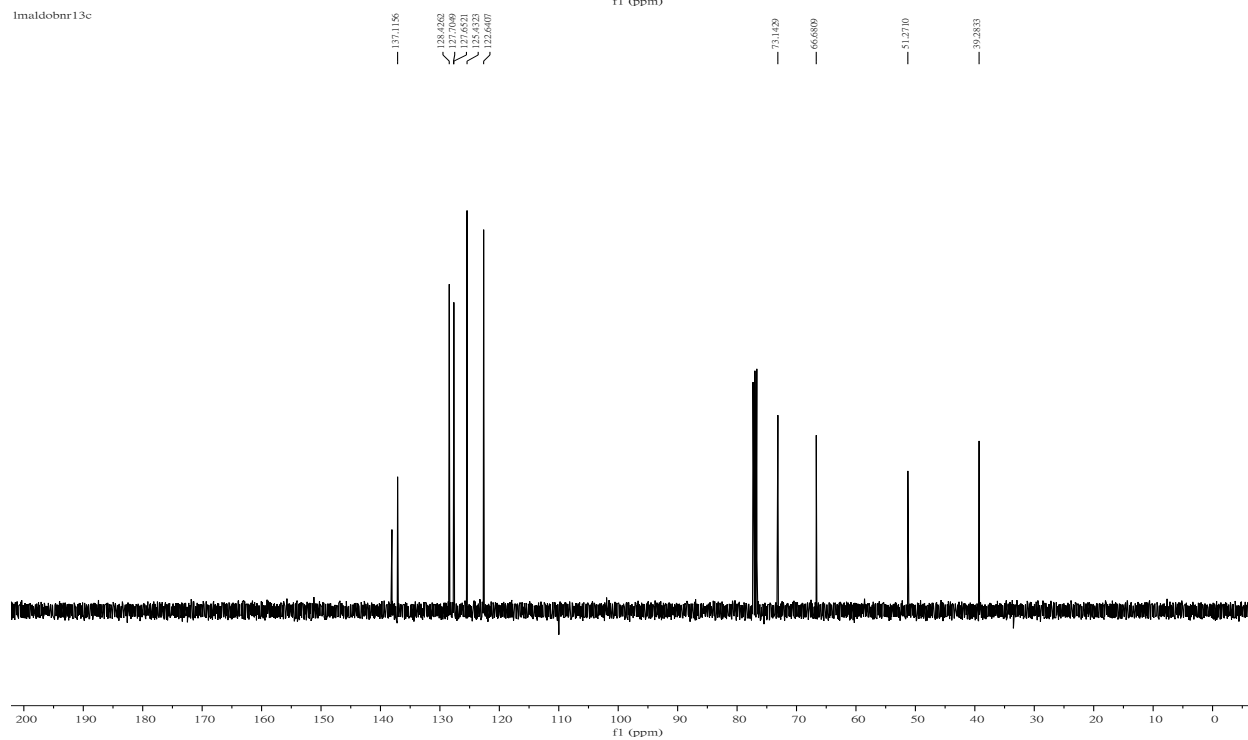

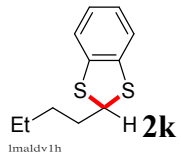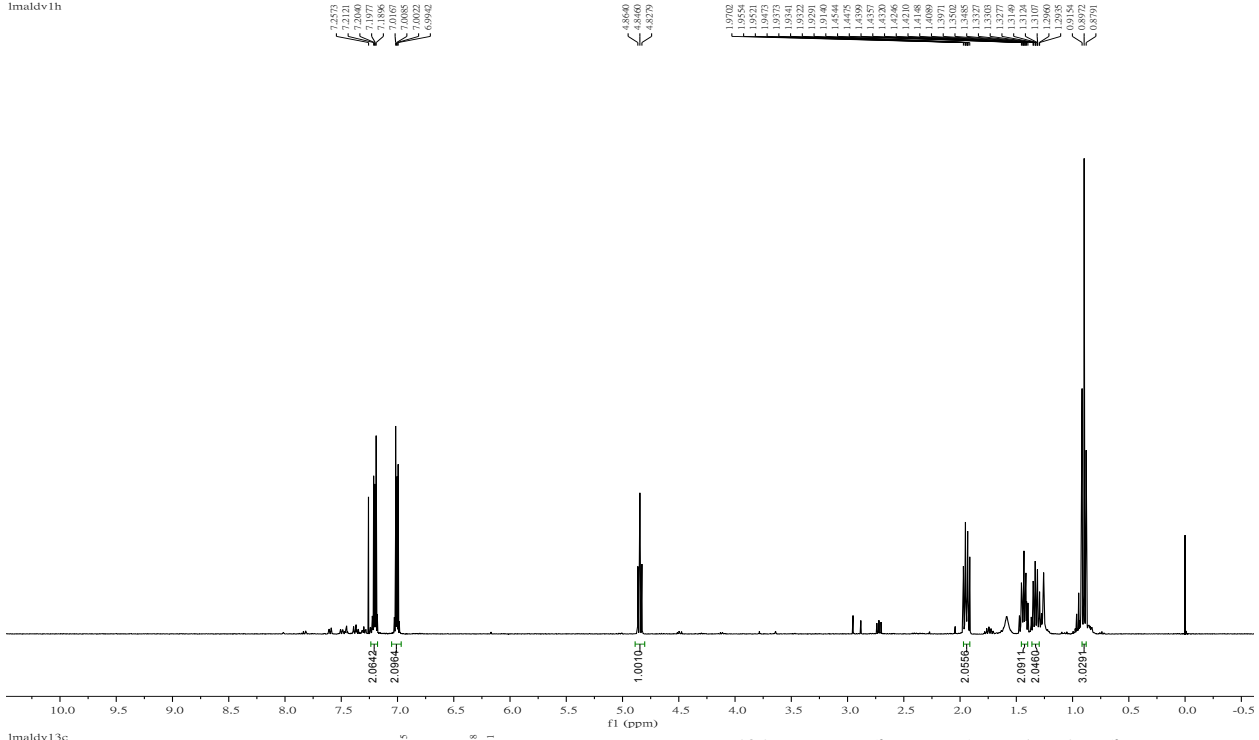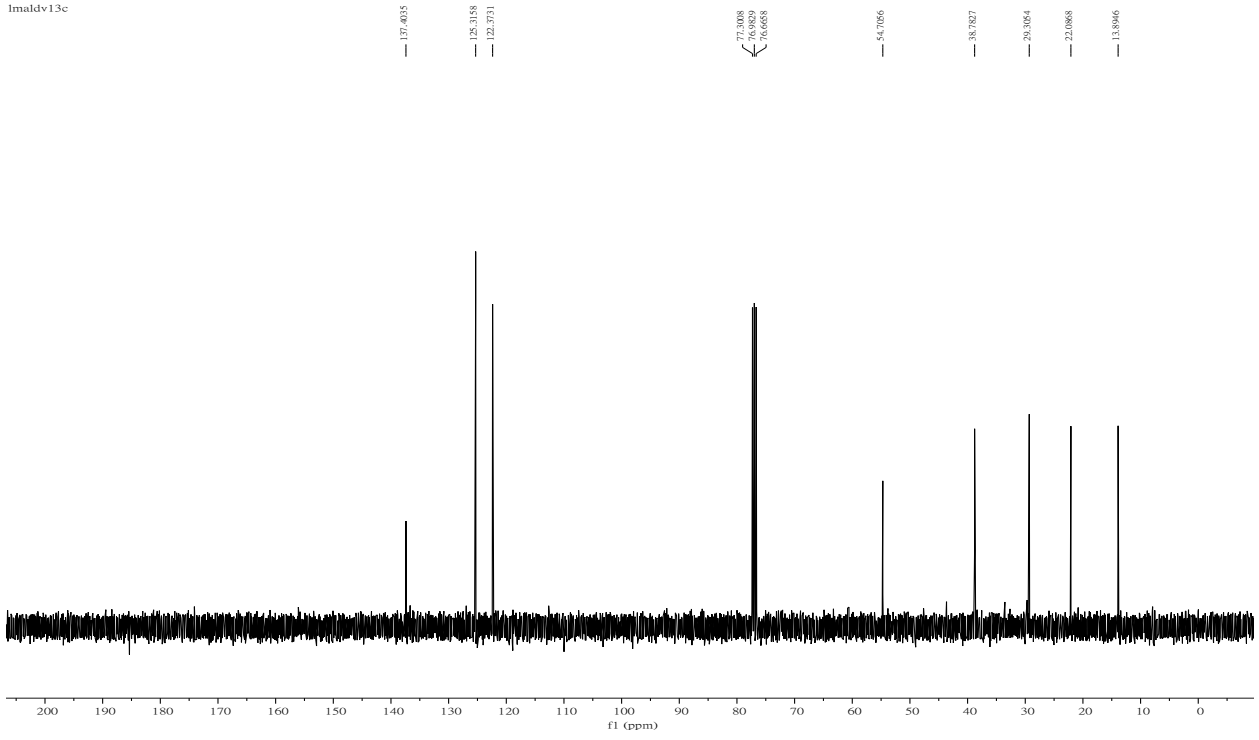

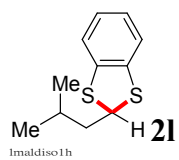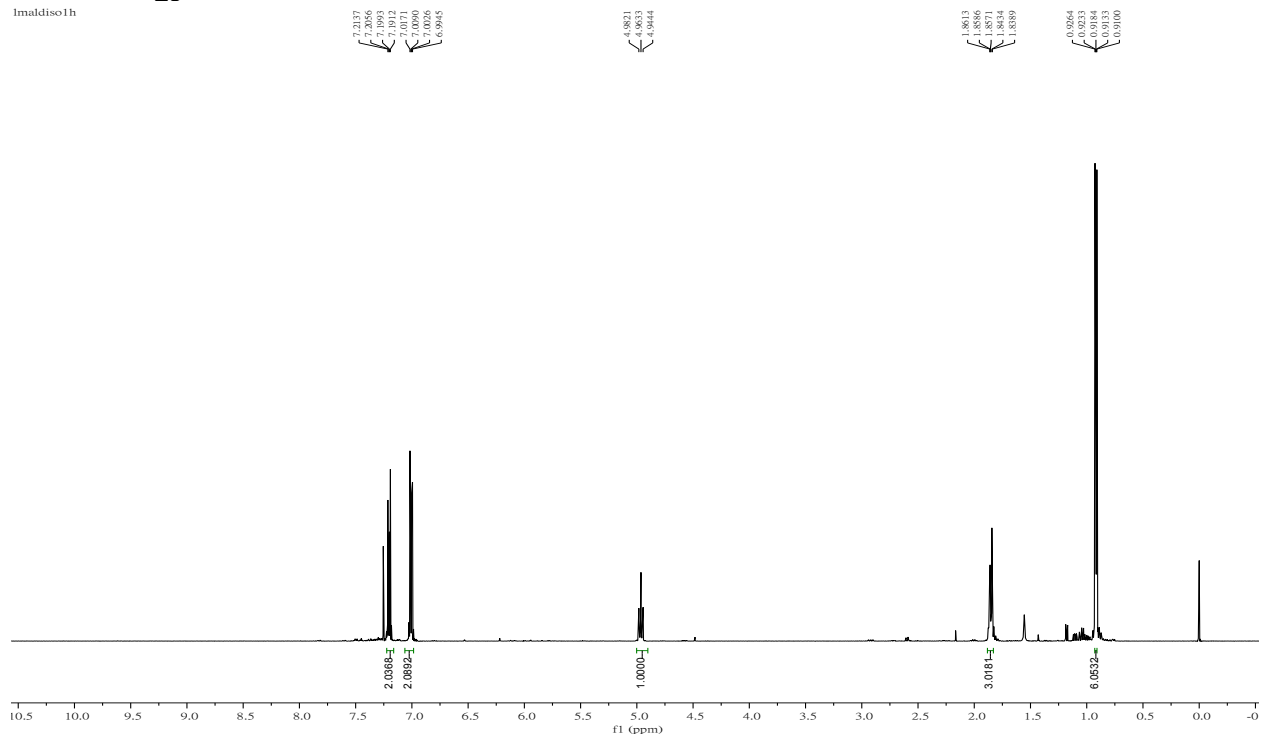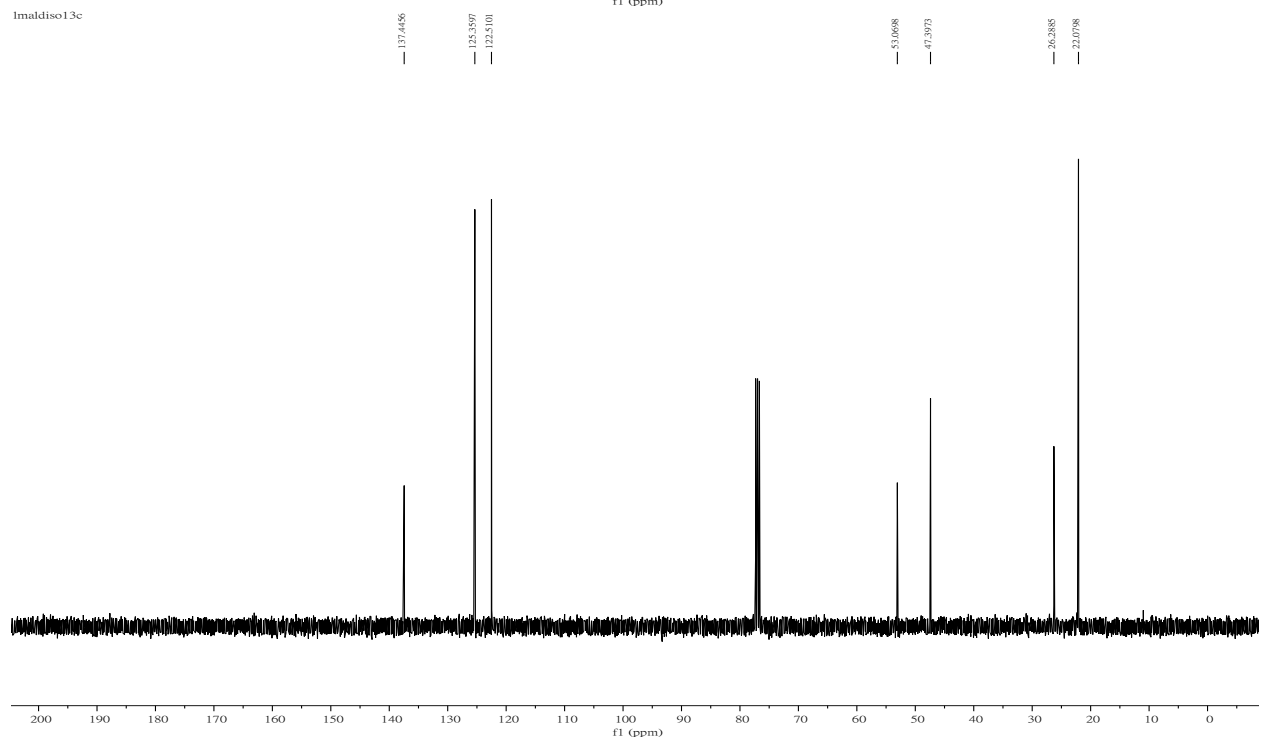

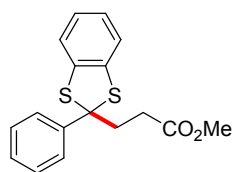

4a

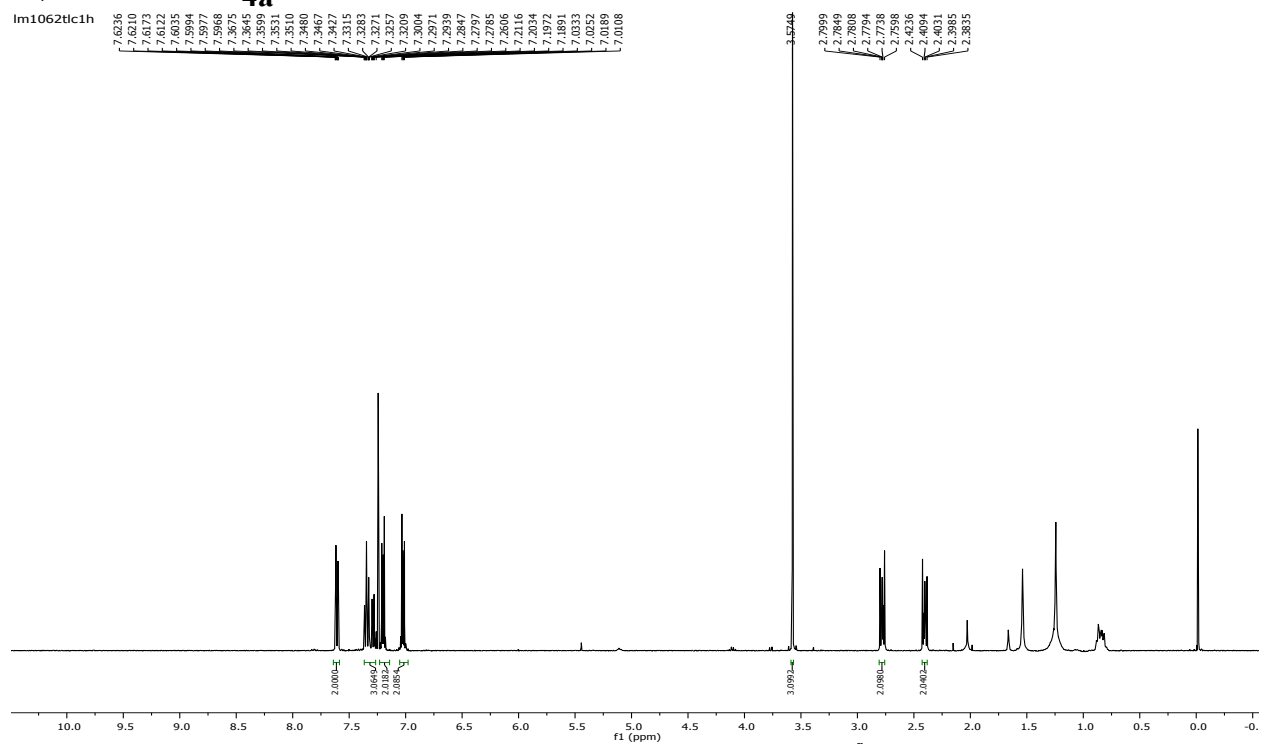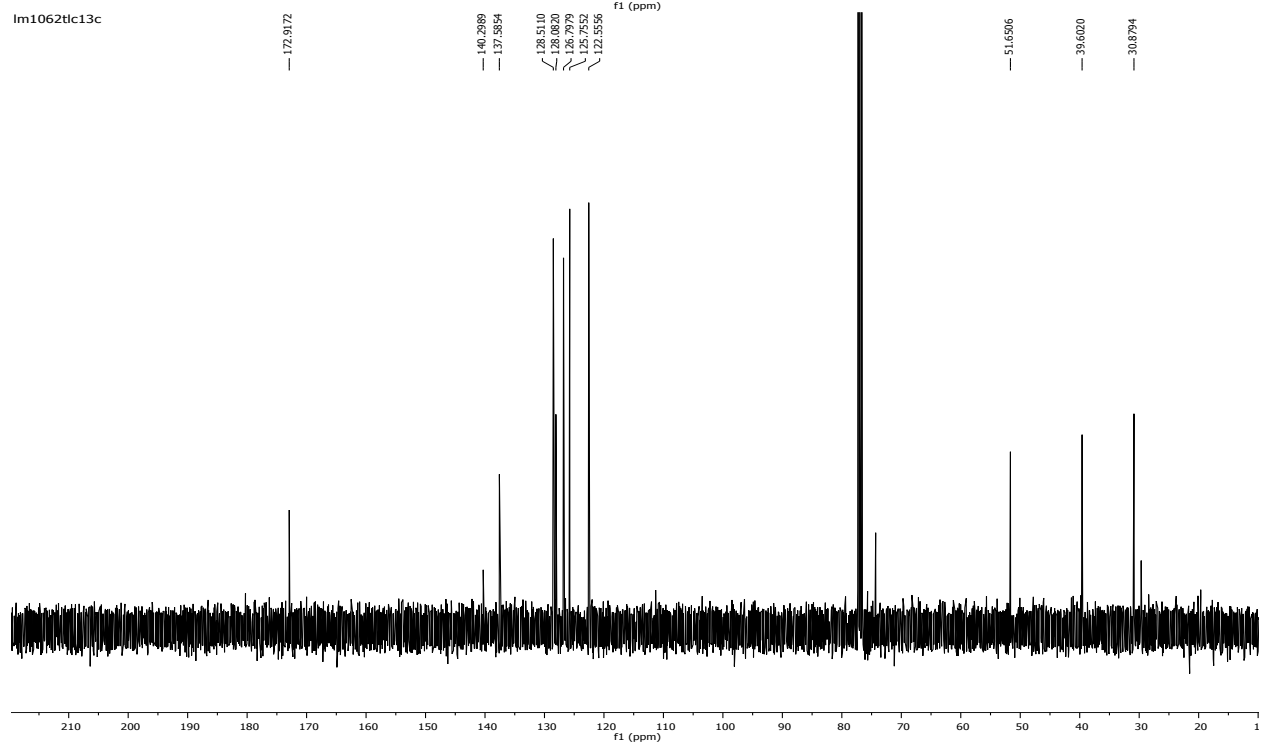

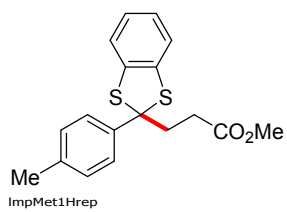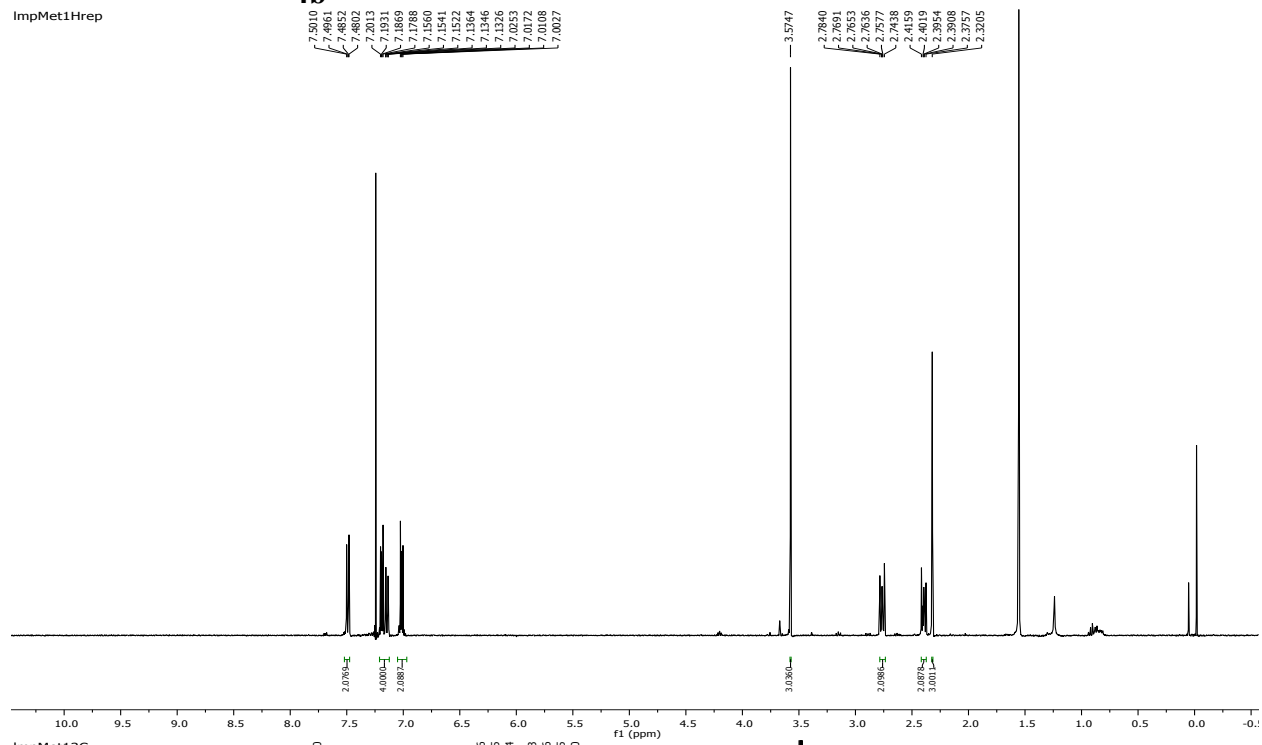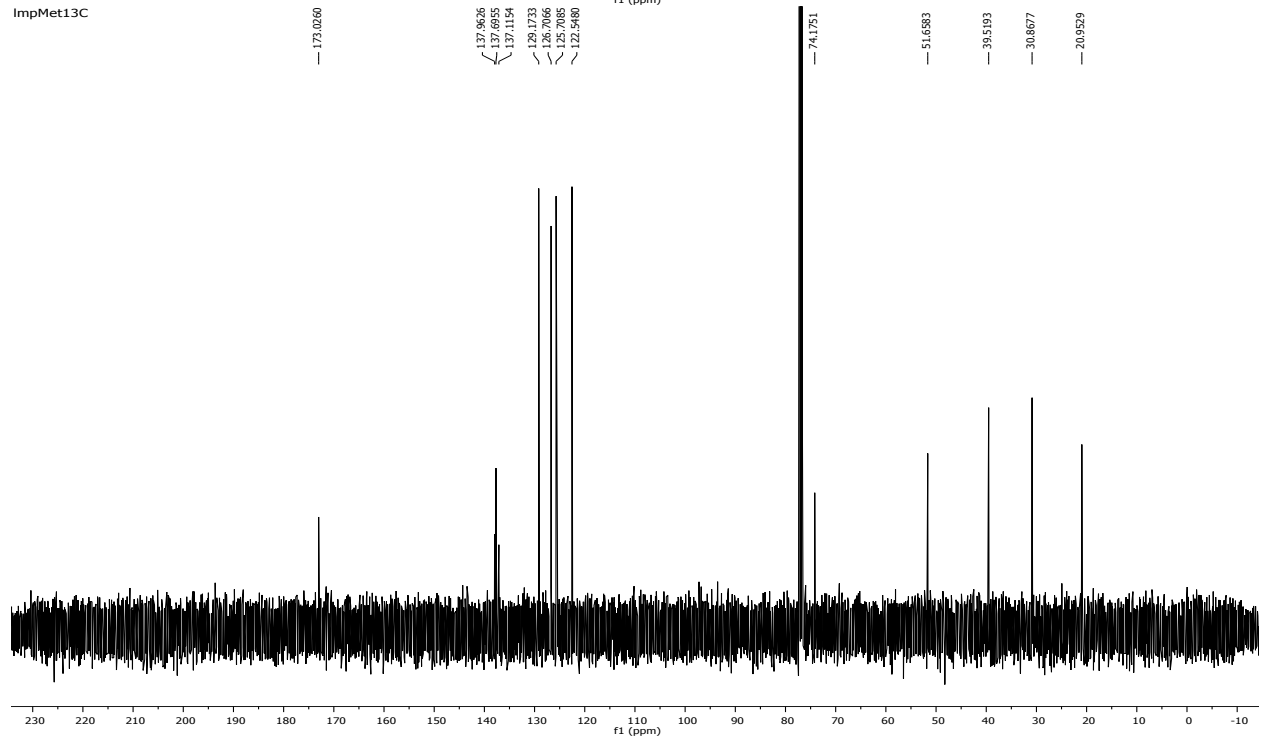

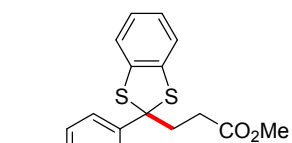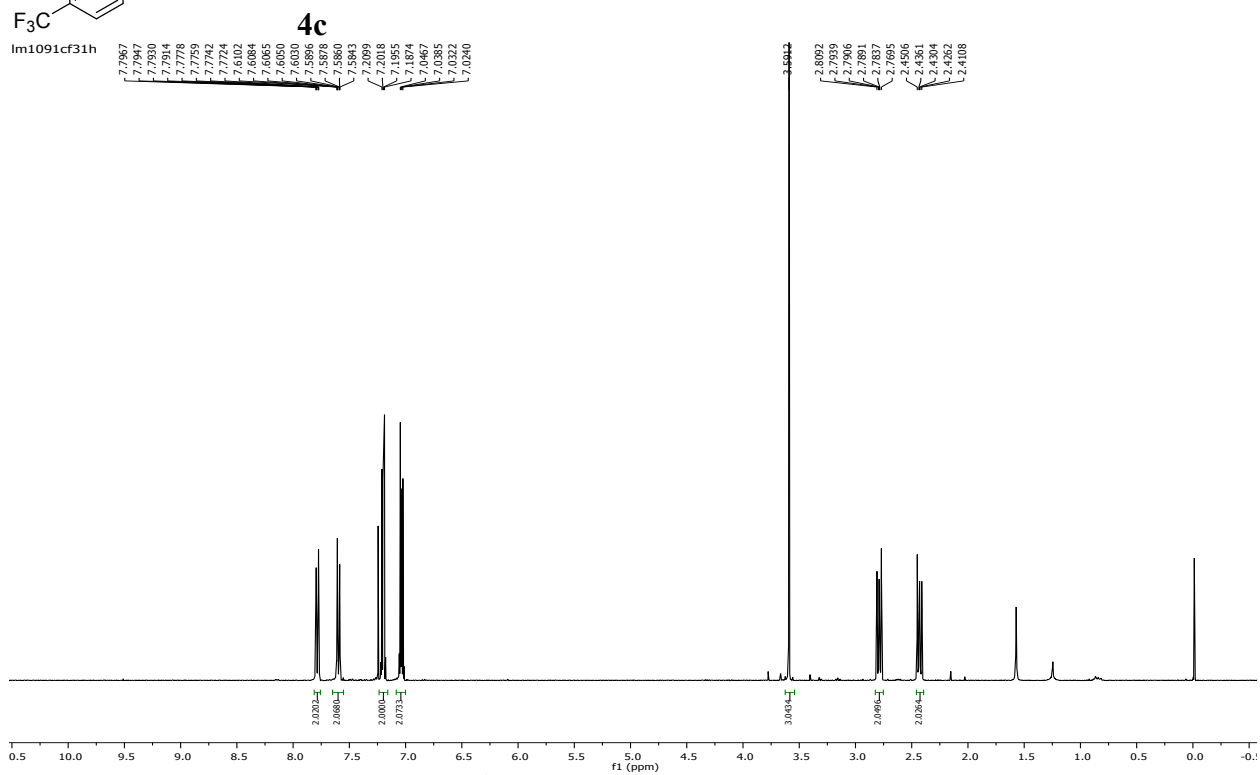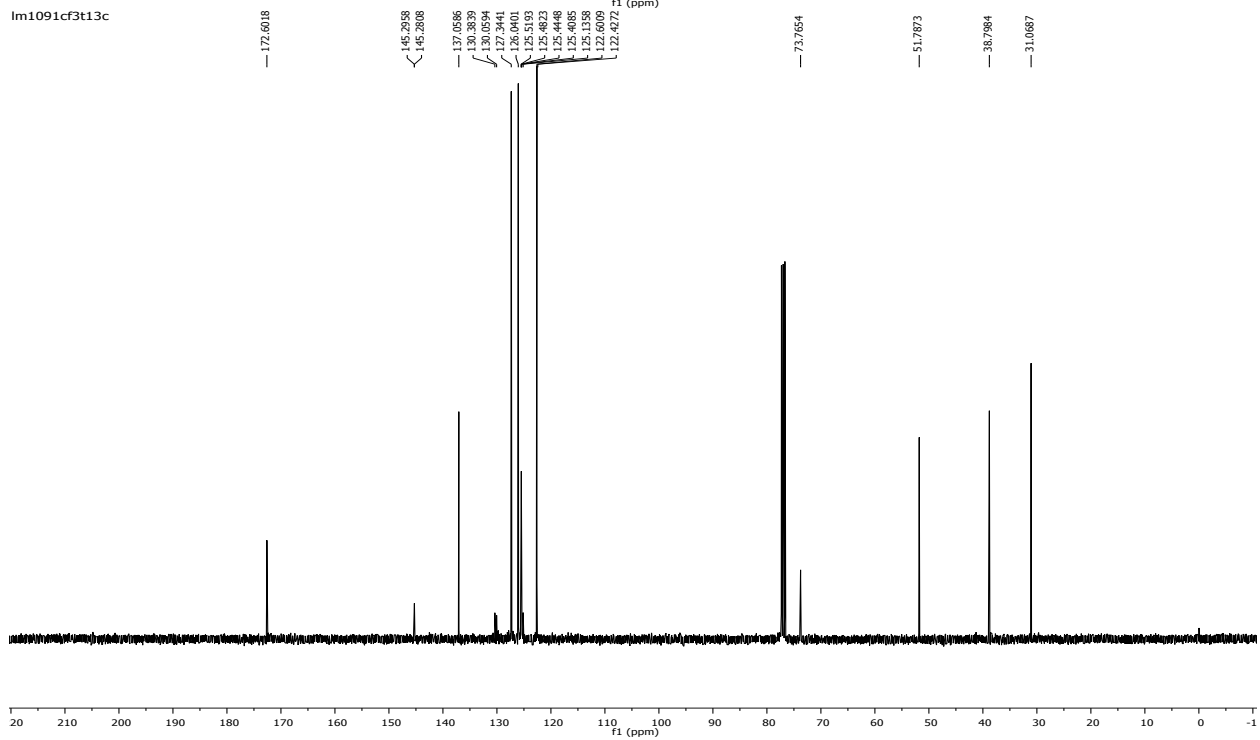

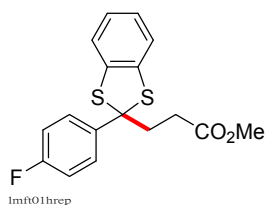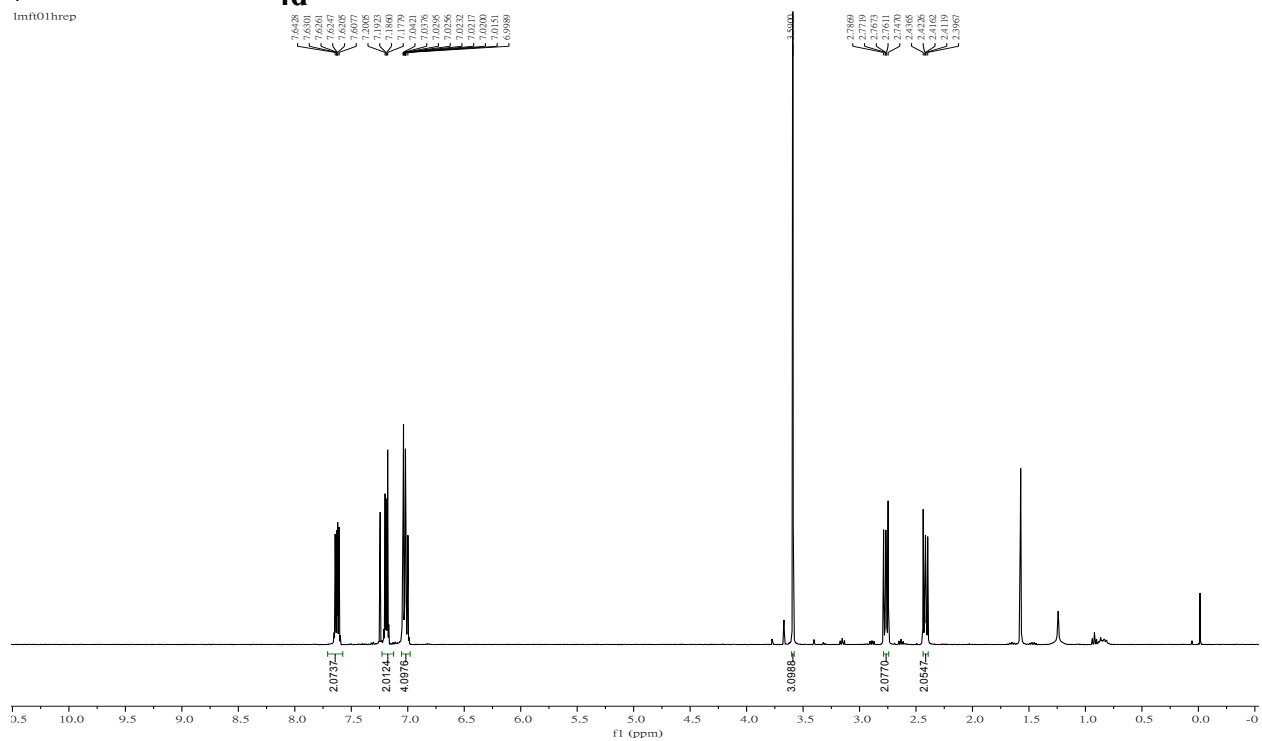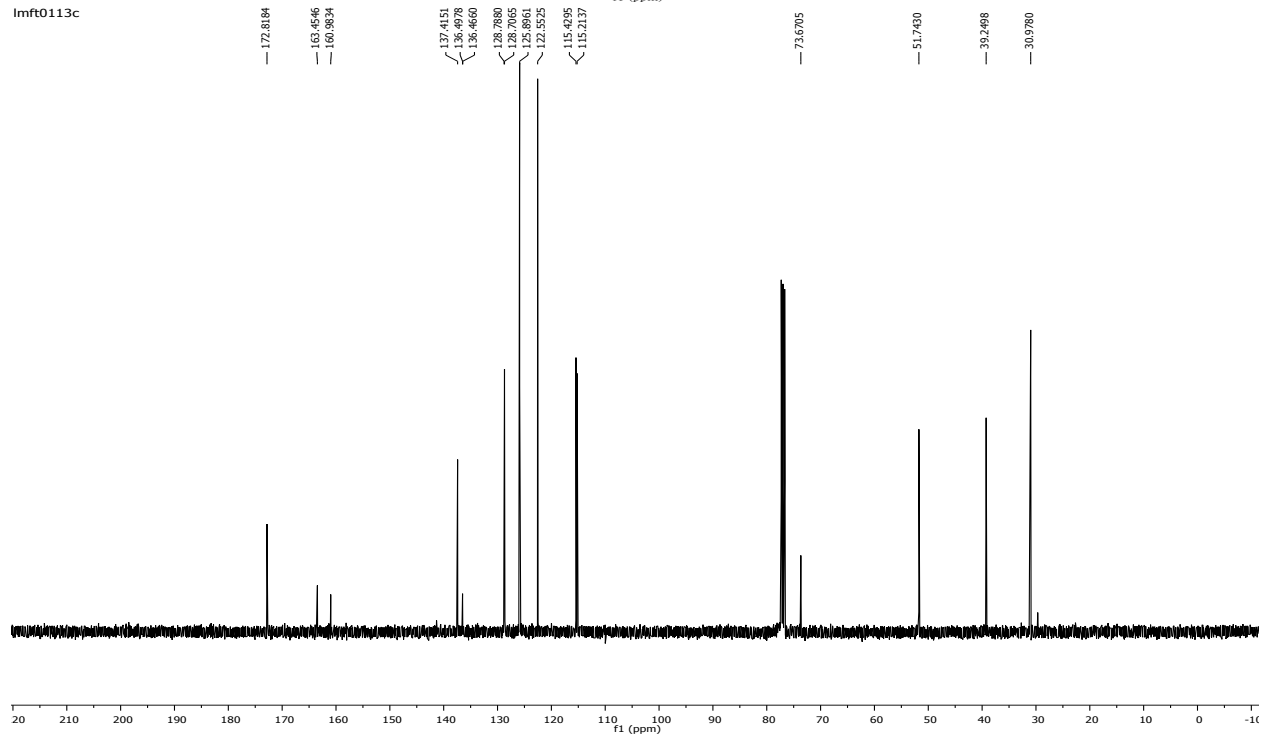

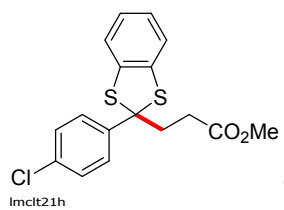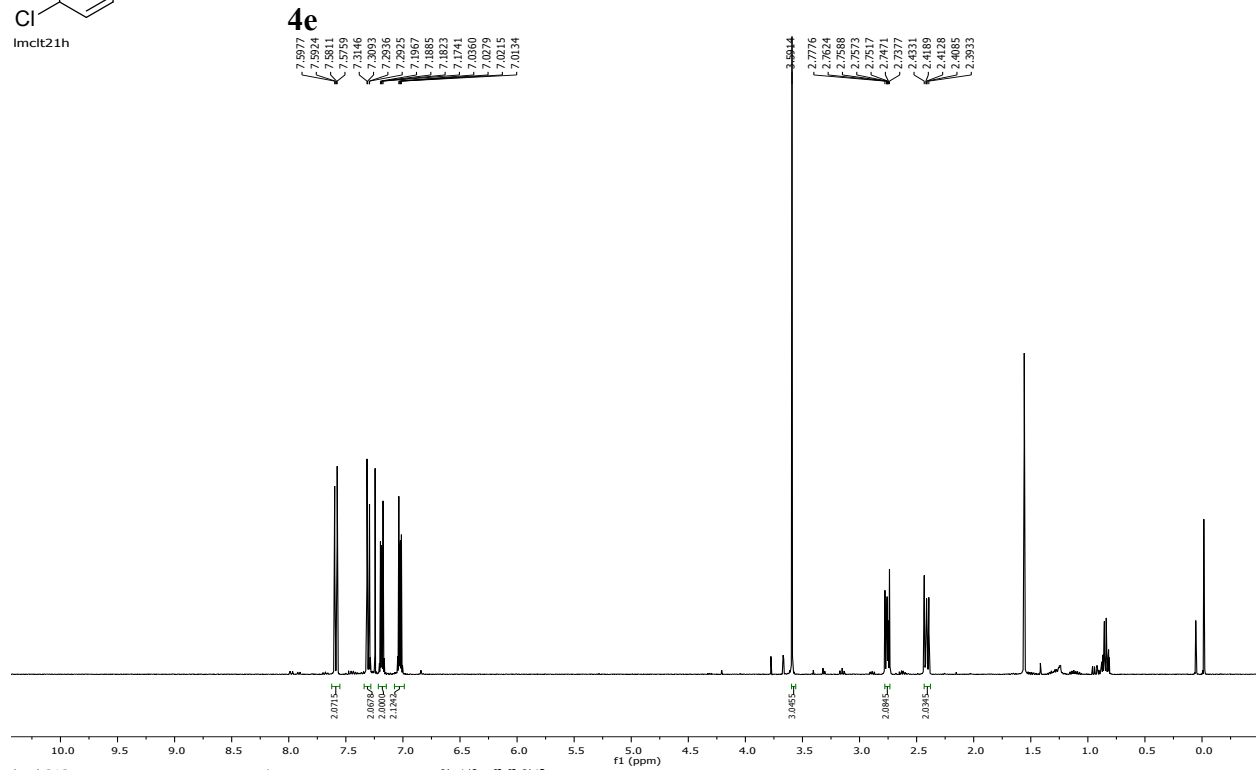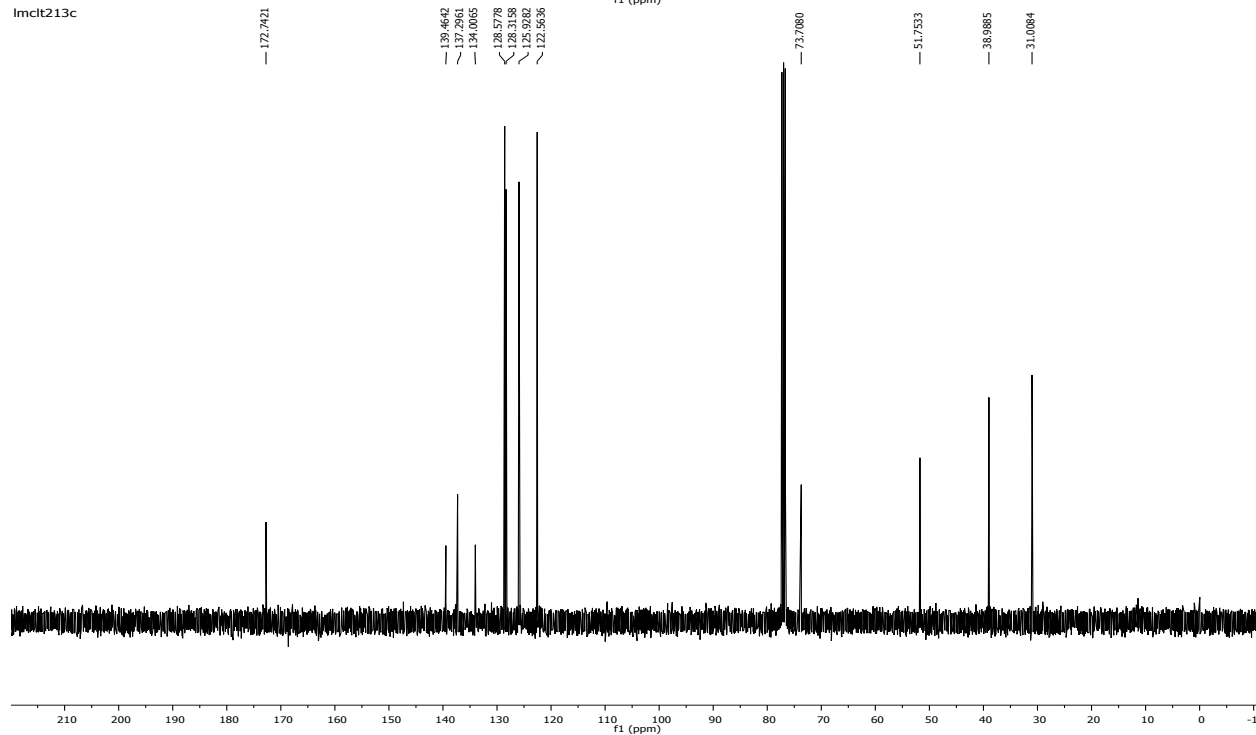



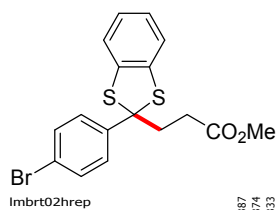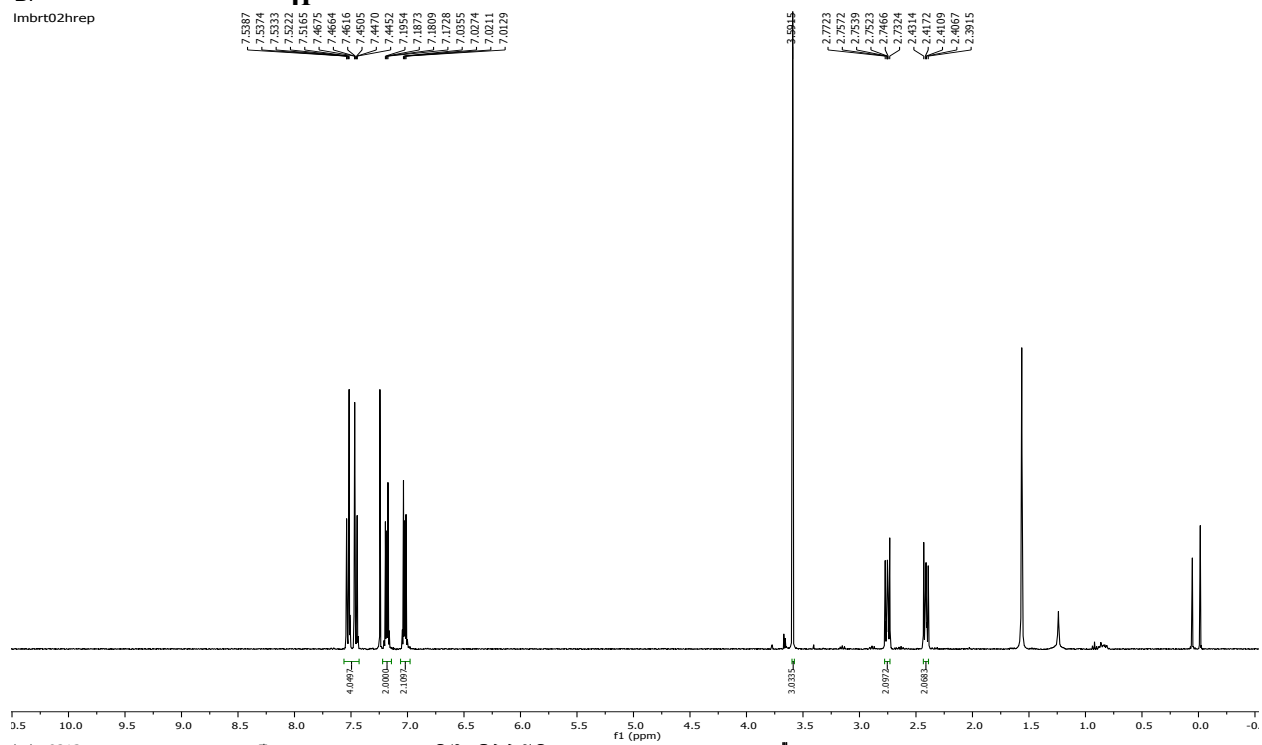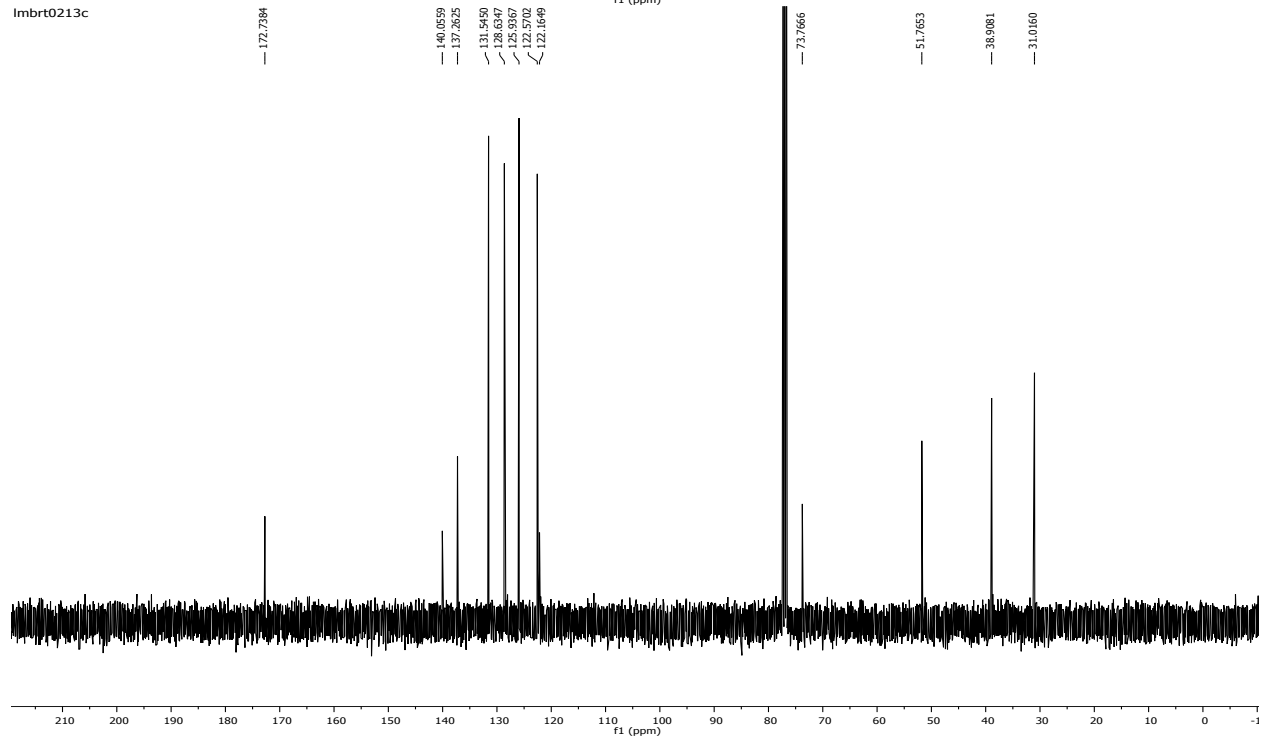

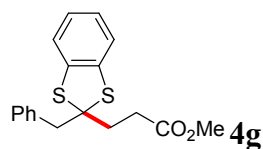

Im11262pht1h

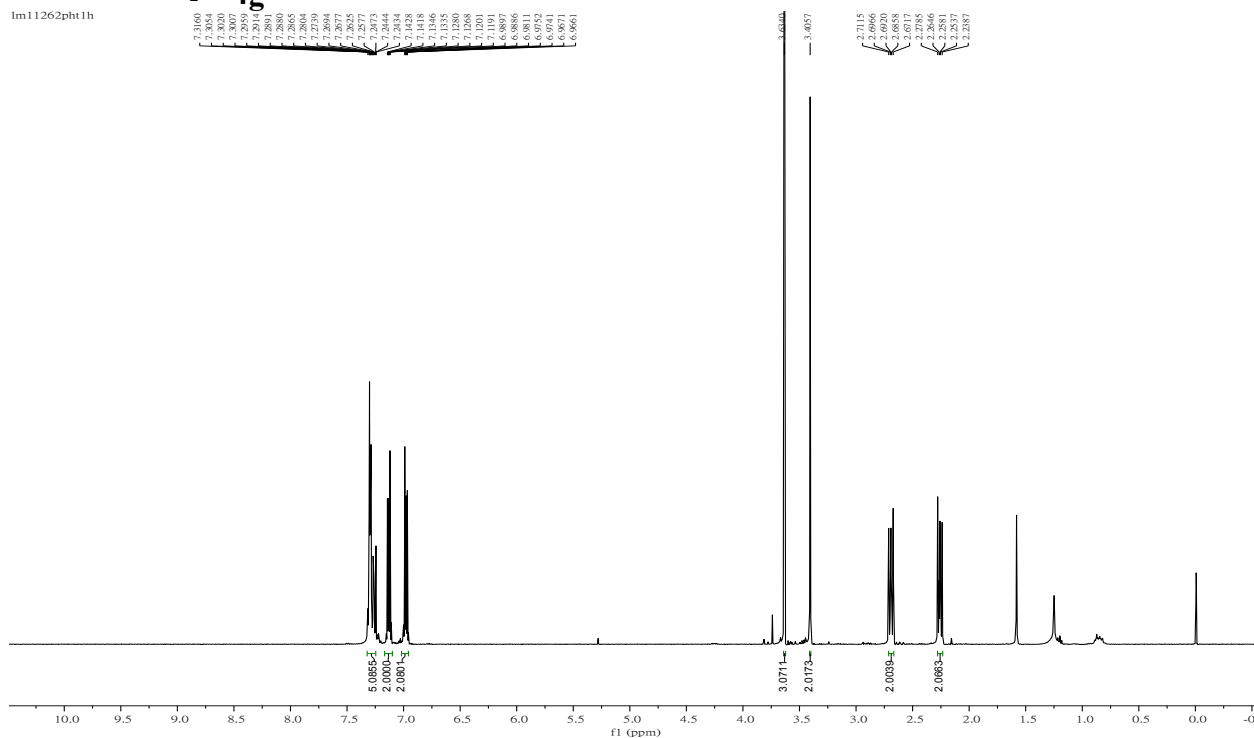

Im11262pht13c

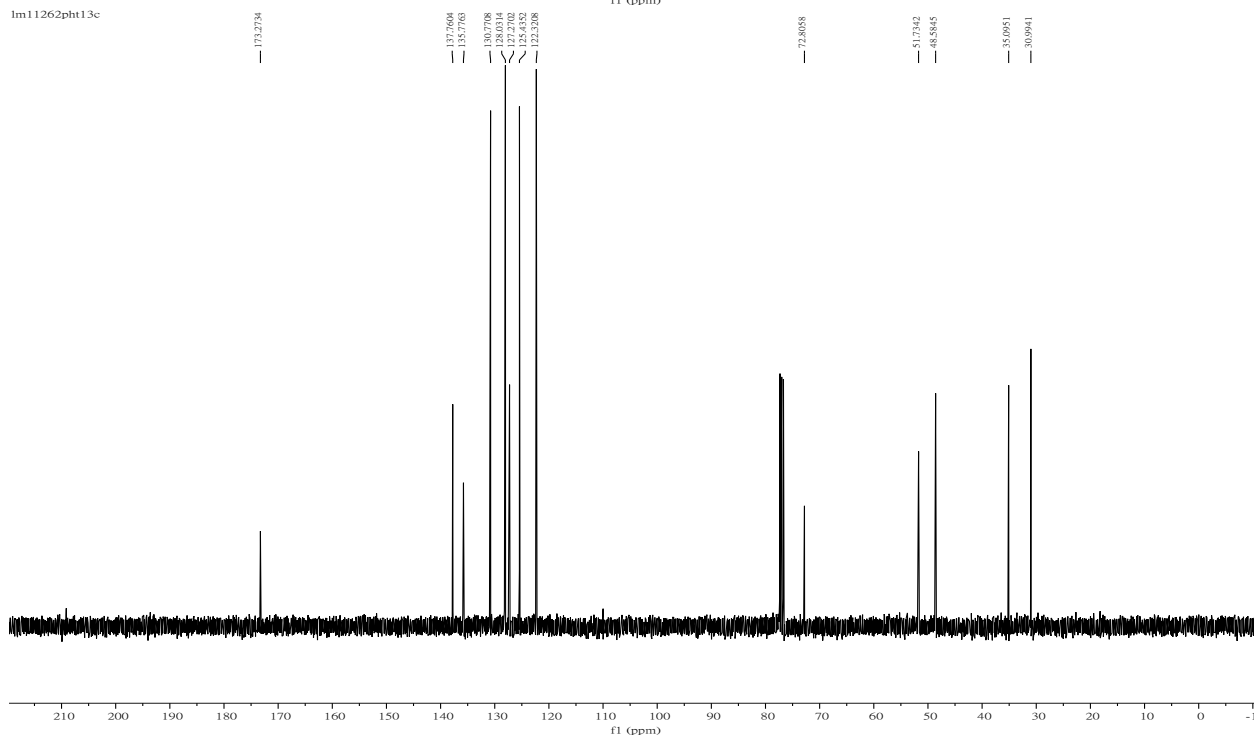

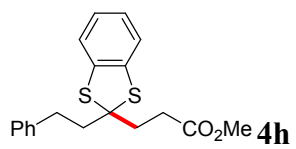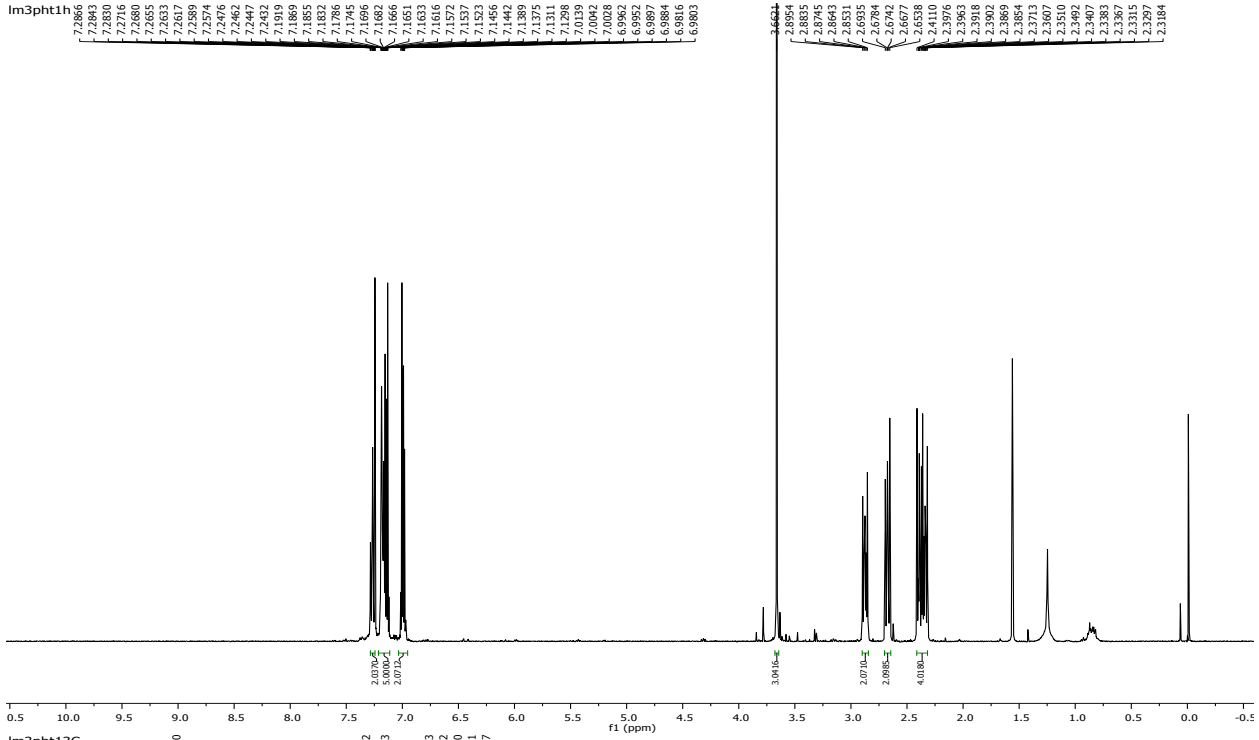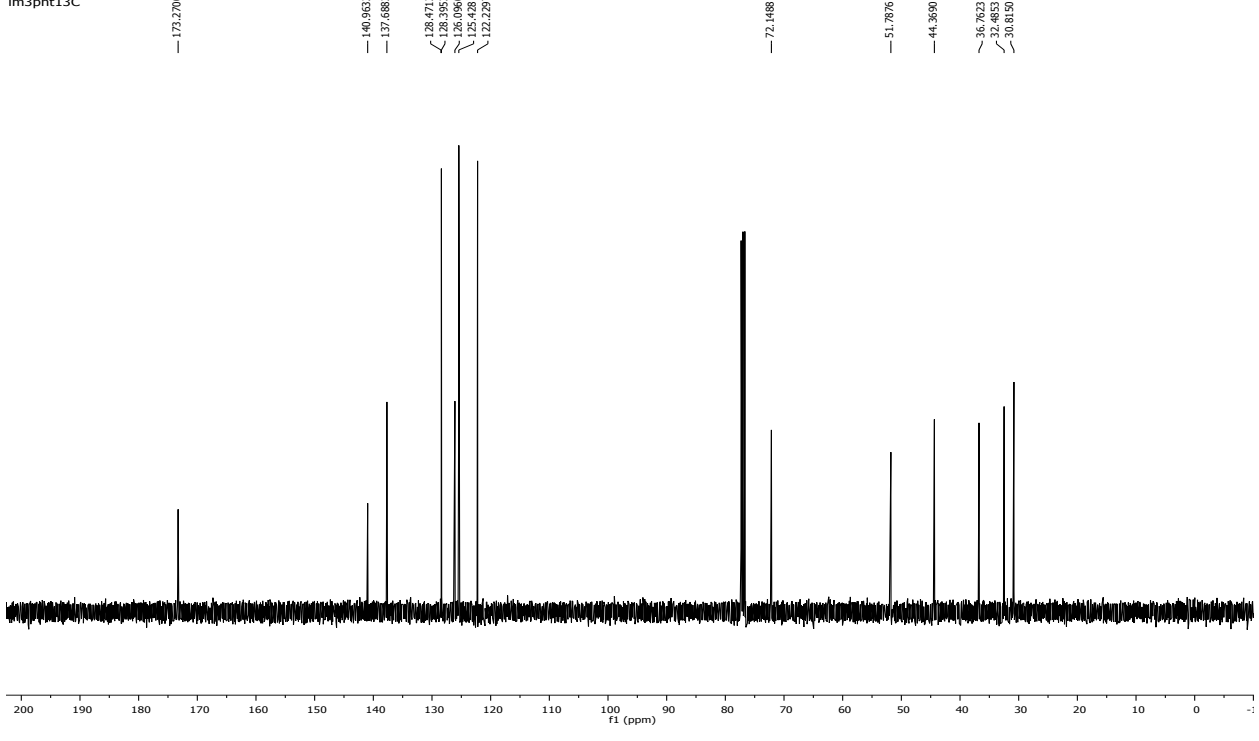

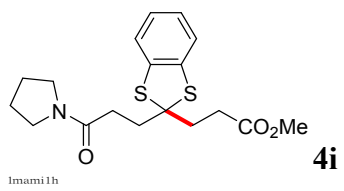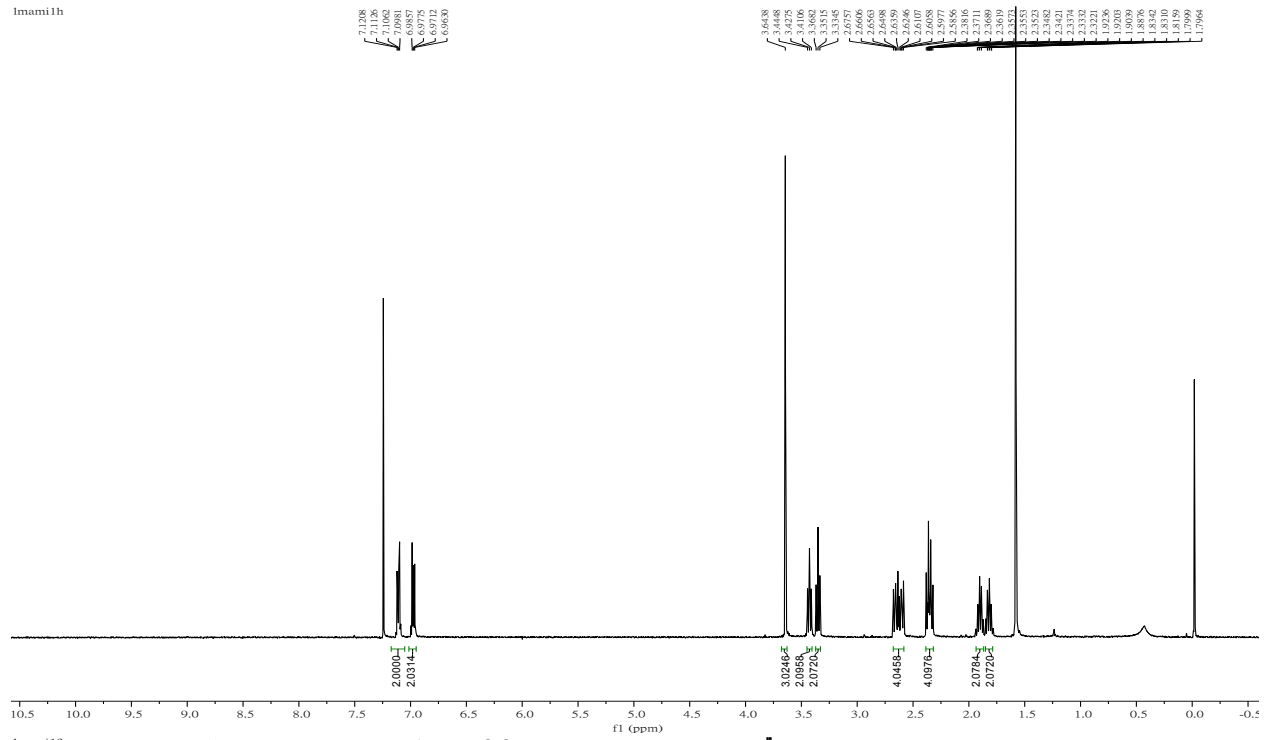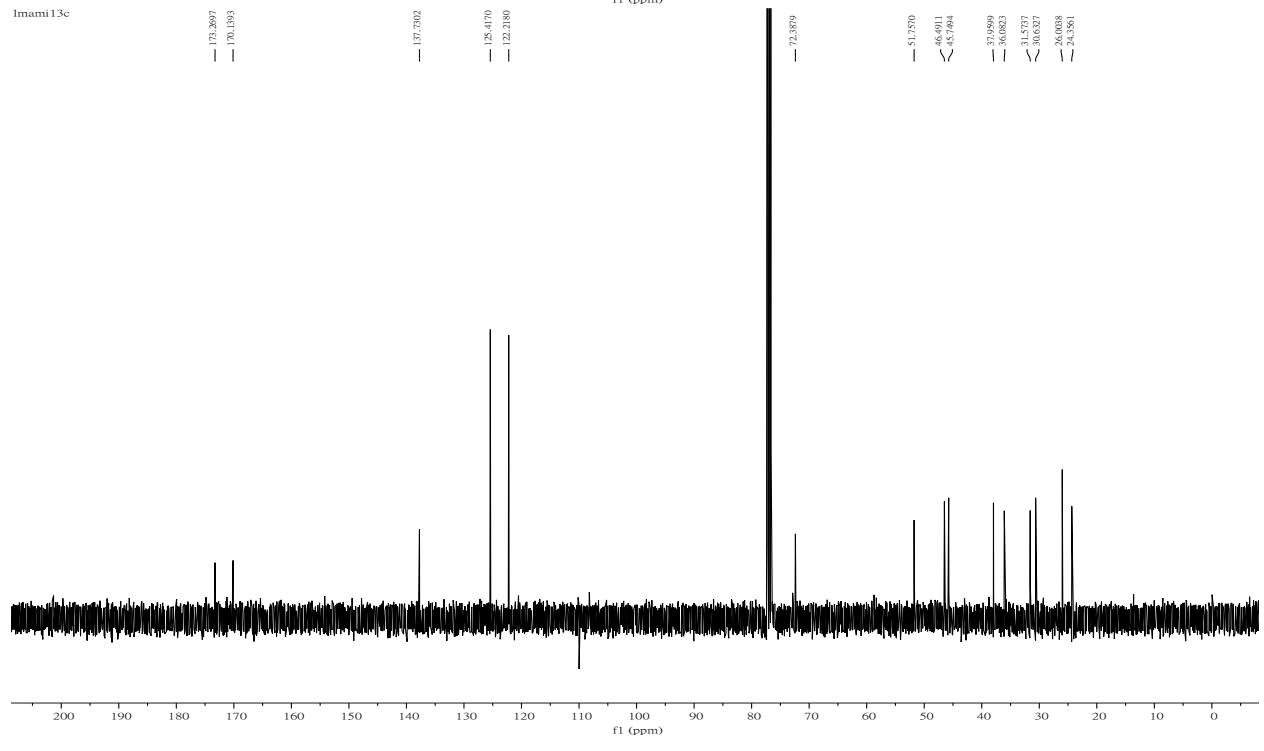

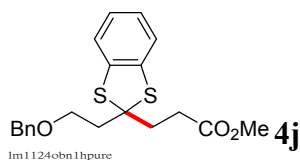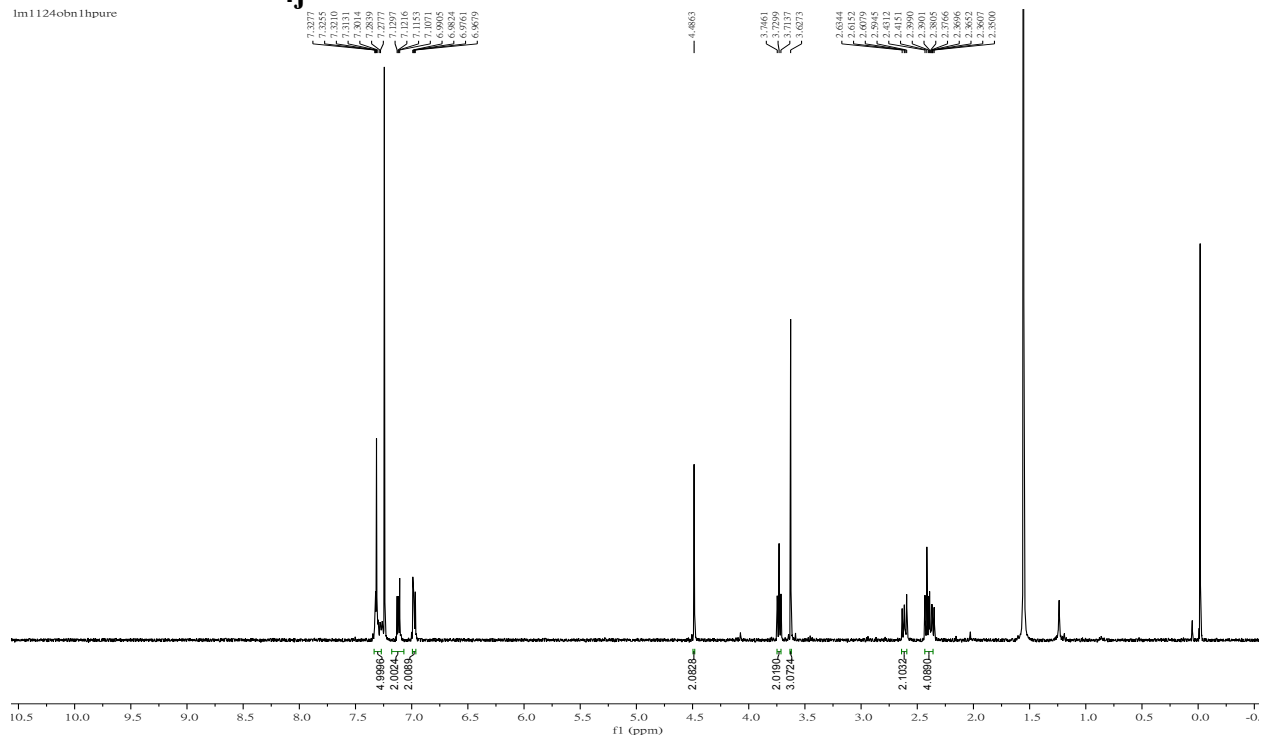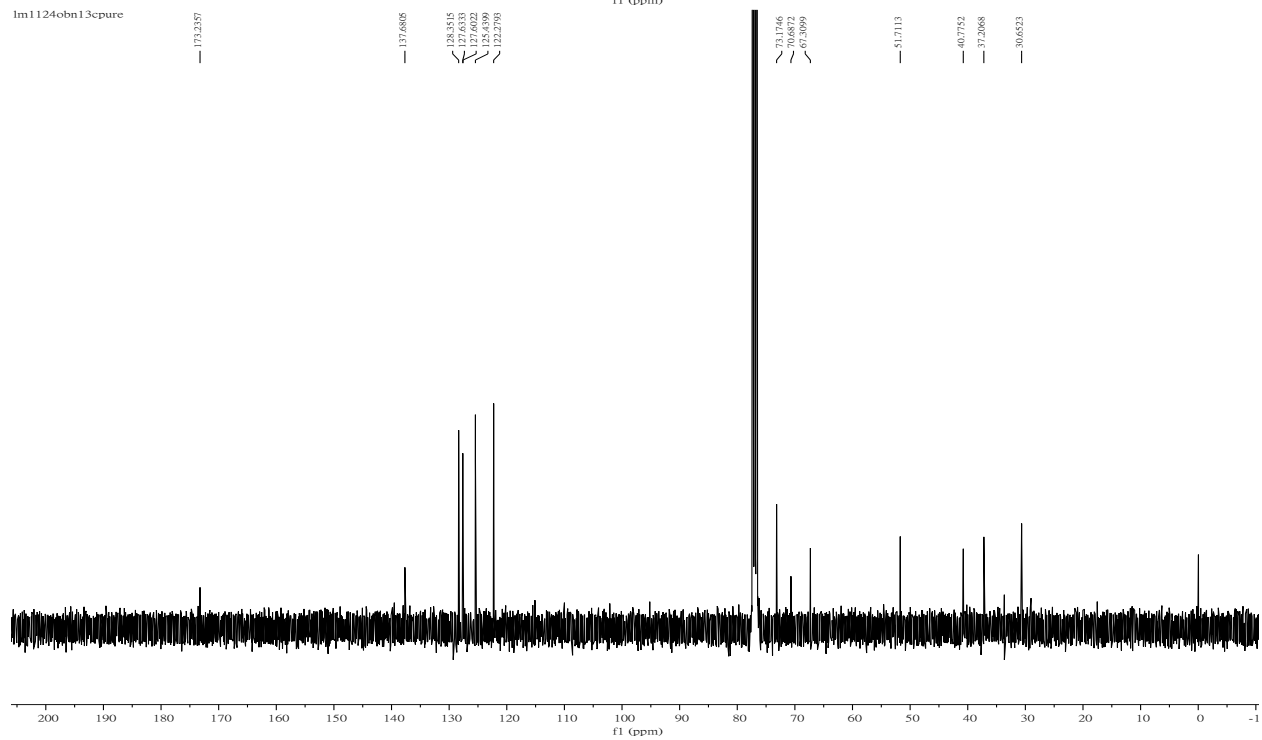

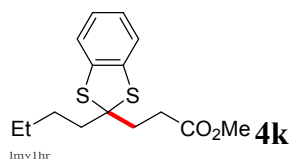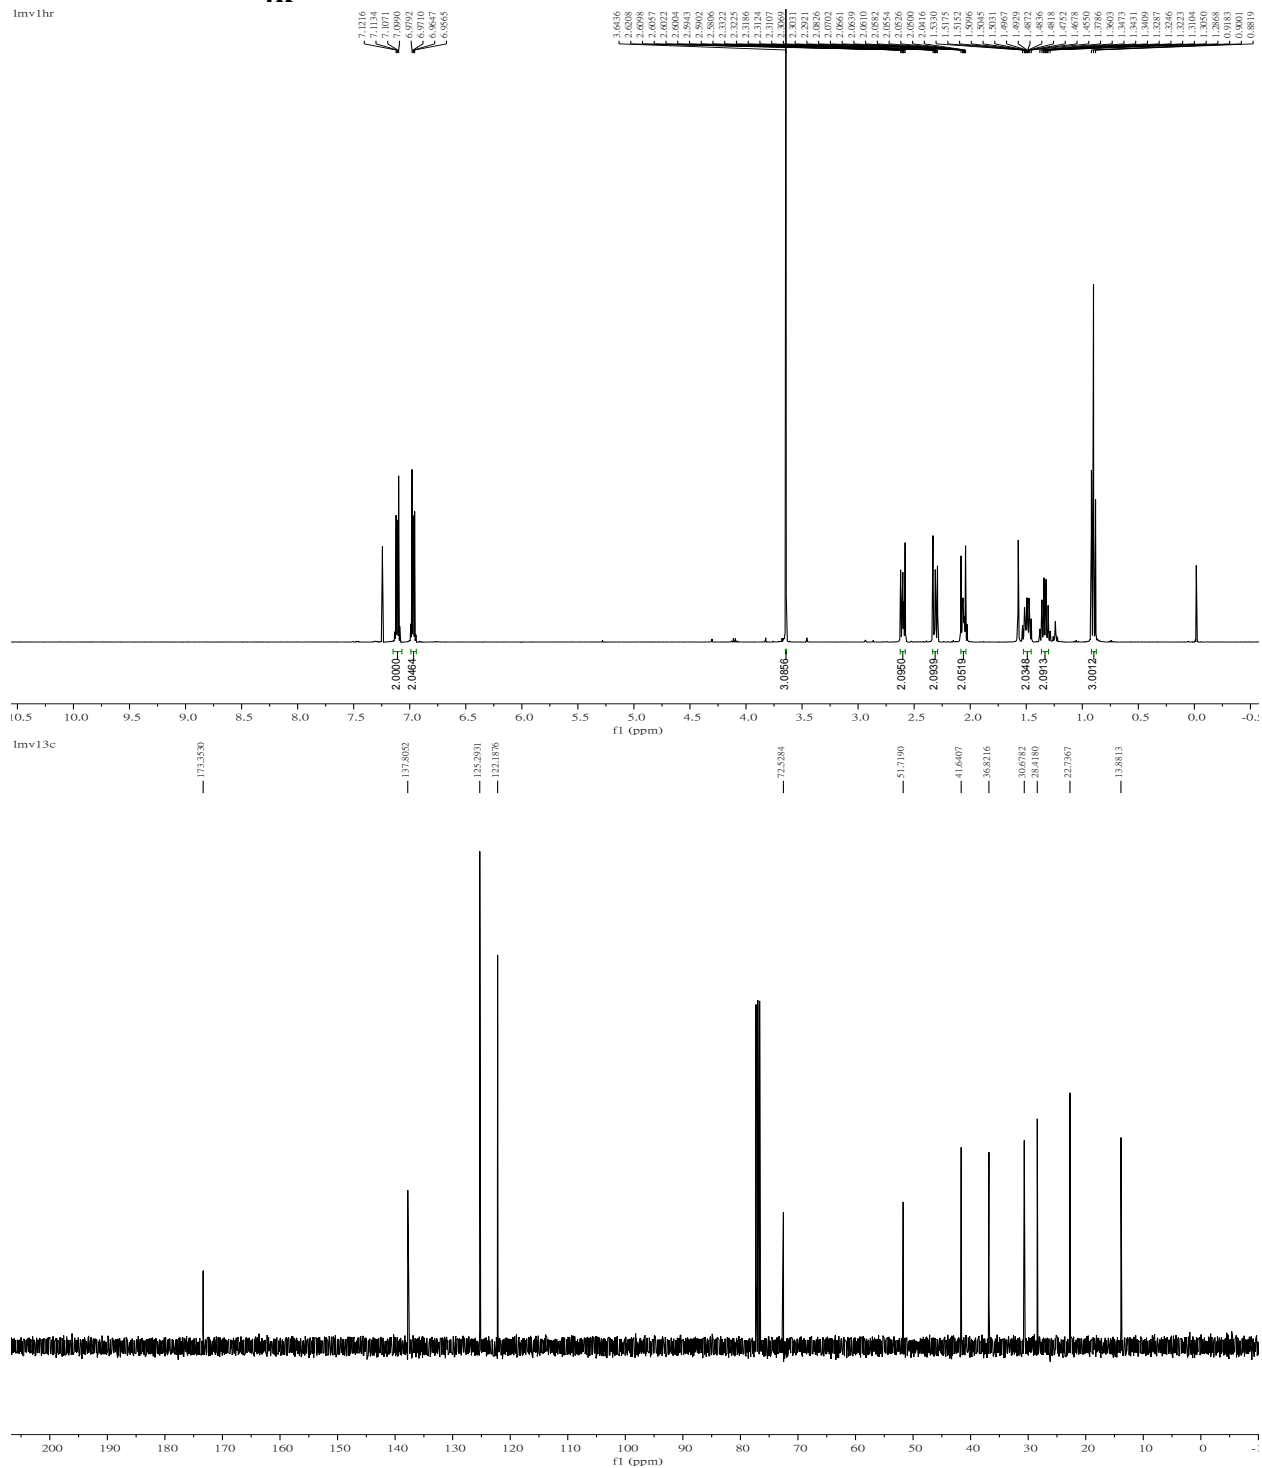

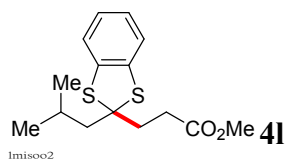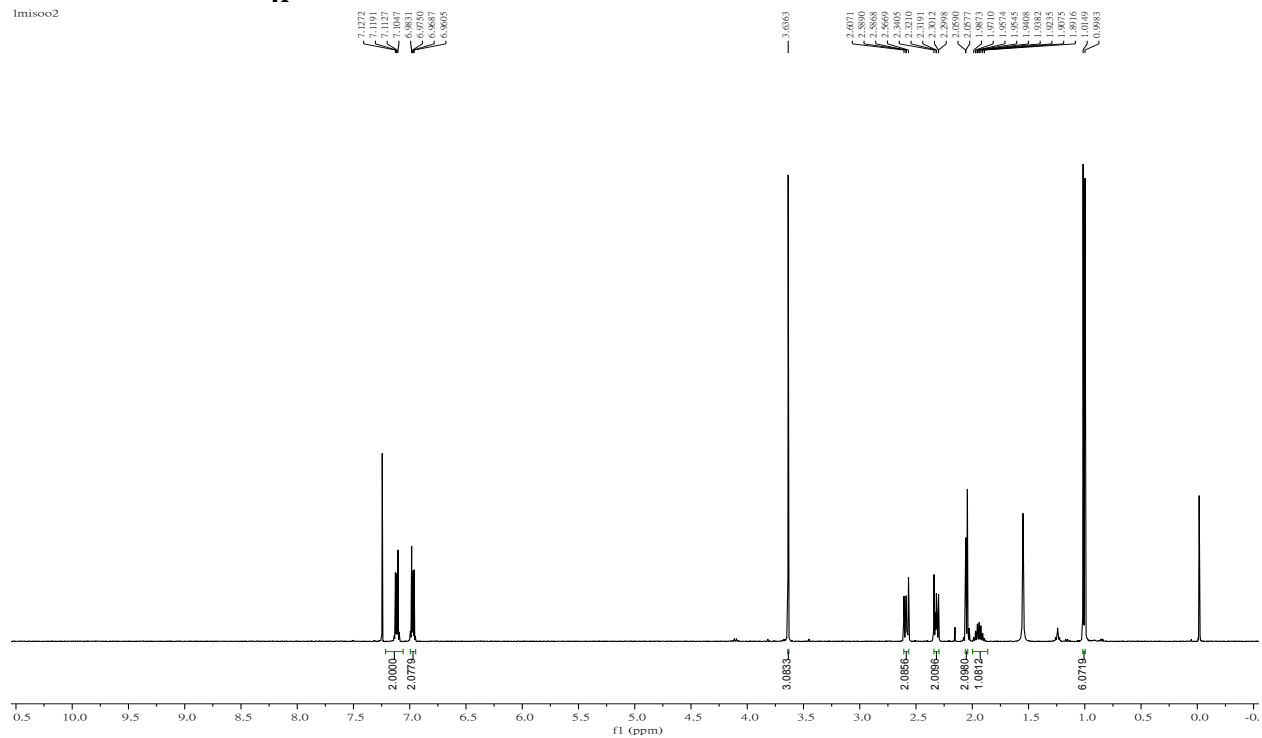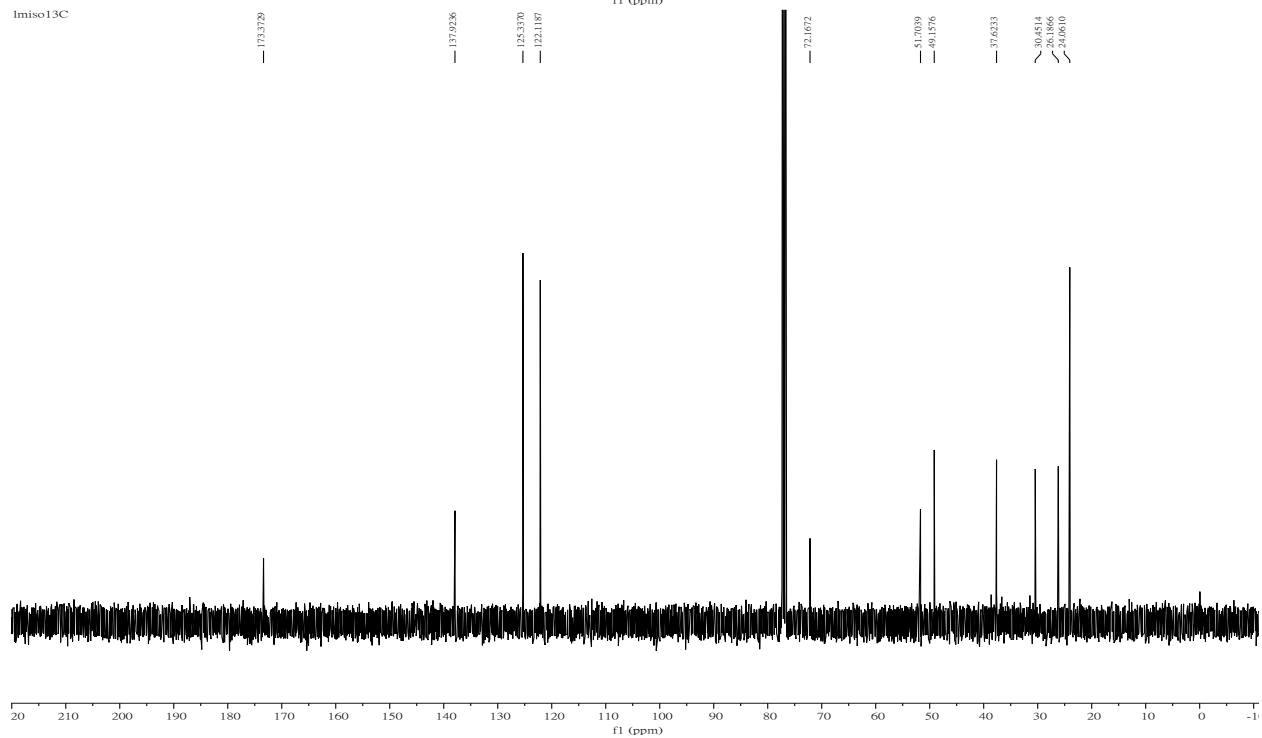

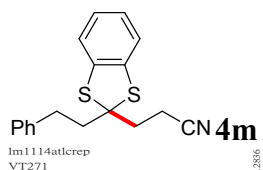

7.2846  
 7.2799  
 7.2752  
 7.2685  
 7.2606  
 7.2442  
 7.2342  
 7.1982  
 7.1907  
 7.1792  
 7.1755  
 7.1673  
 7.1591  
 7.1524  
 7.1446  
 7.1384  
 7.1324  
 7.0295  
 7.0296  
 7.0154

2.9131  
 2.8923  
 2.8740  
 2.7146  
 2.7006  
 2.6979  
 2.6955  
 2.6788  
 2.3853  
 2.1607  
 2.1363  
 2.1014  
 2.1544  
 2.1364  
 2.1177  
 2.1357

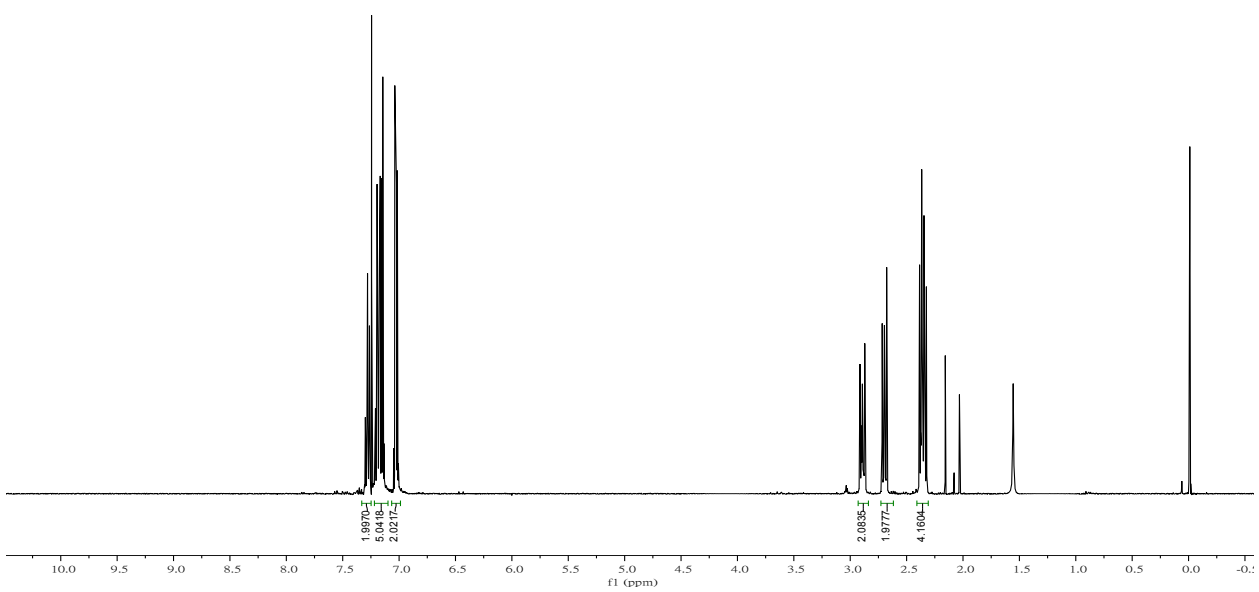

Im1114atl13c  
 VT271

140.6510  
 137.0241  
 128.5787  
 128.3765  
 128.1117  
 122.3131  
 119.1576

71.2099

43.8607  
 38.3814  
 32.6580

14.0051

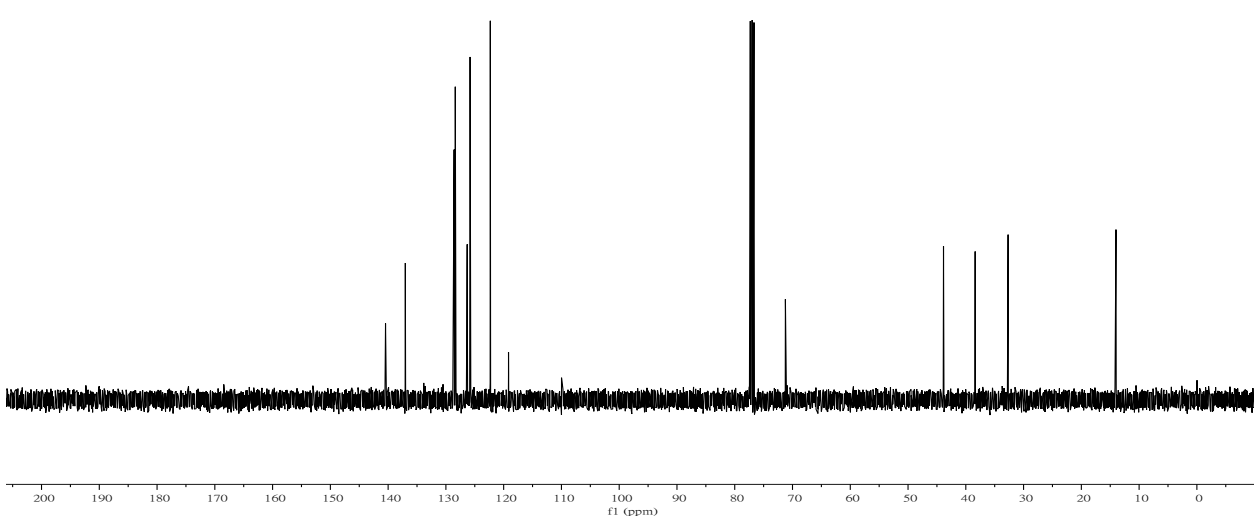



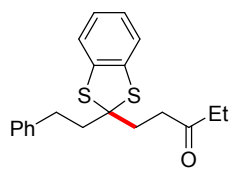

**4n**

lm1118ct21h

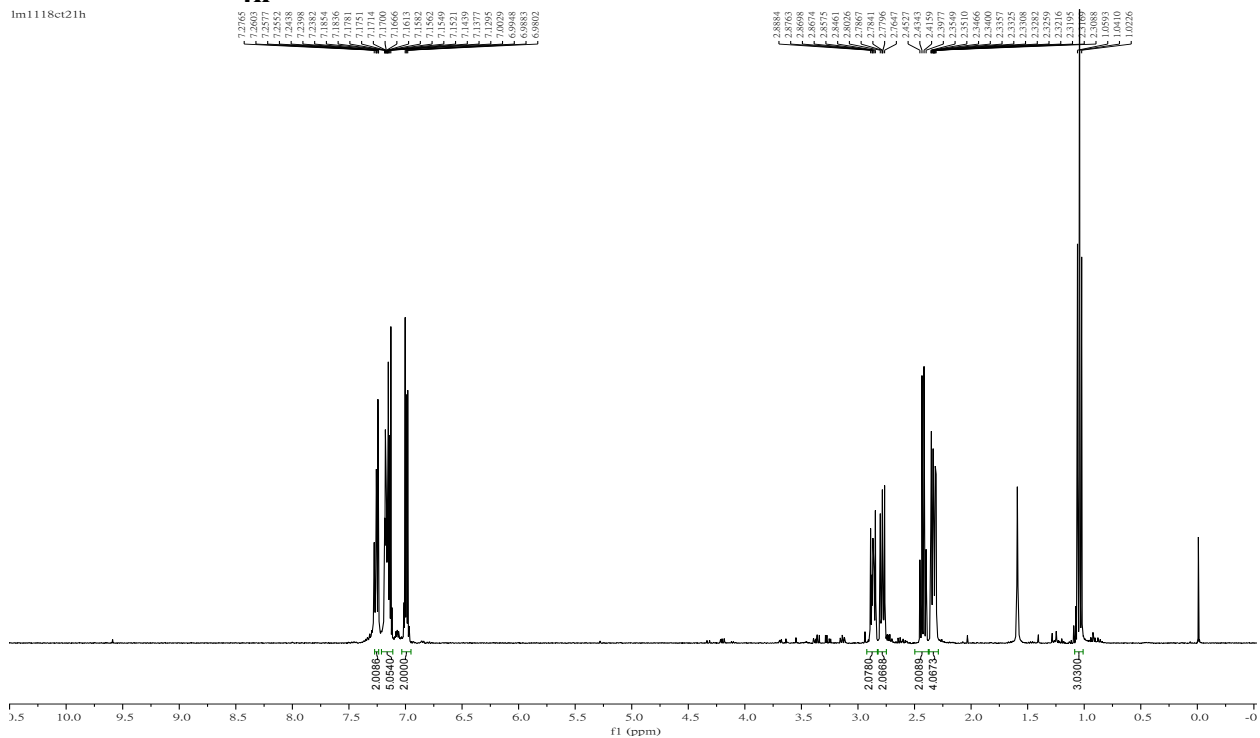

lm1118ct13c

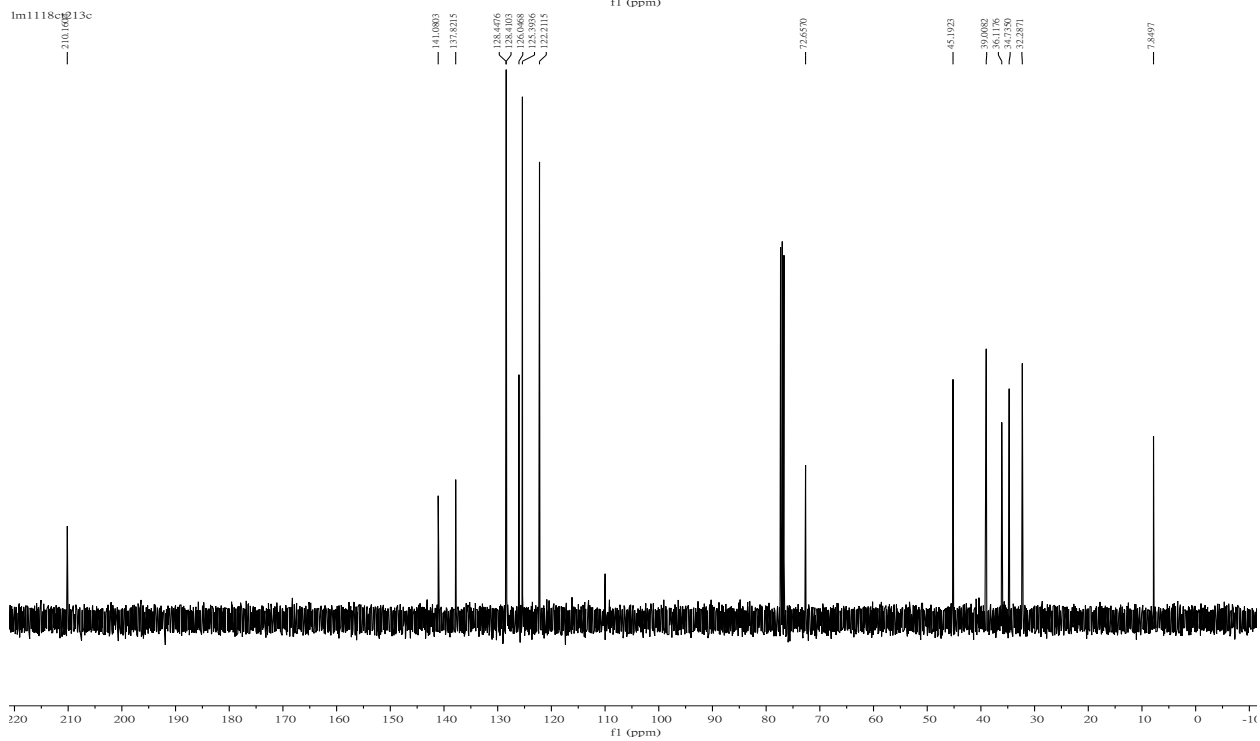

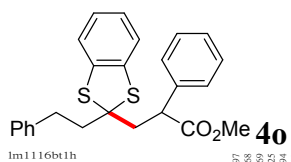

Im1116bt1h

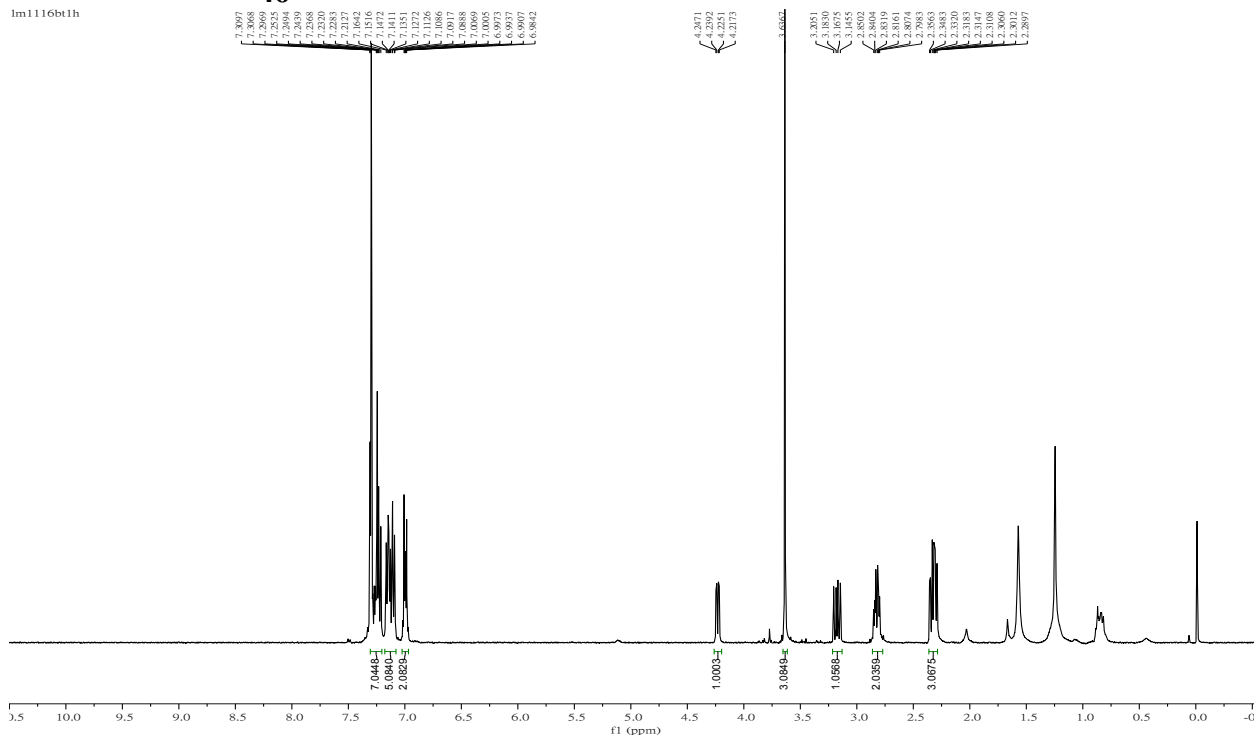

Im1116bt213c  
new experiment

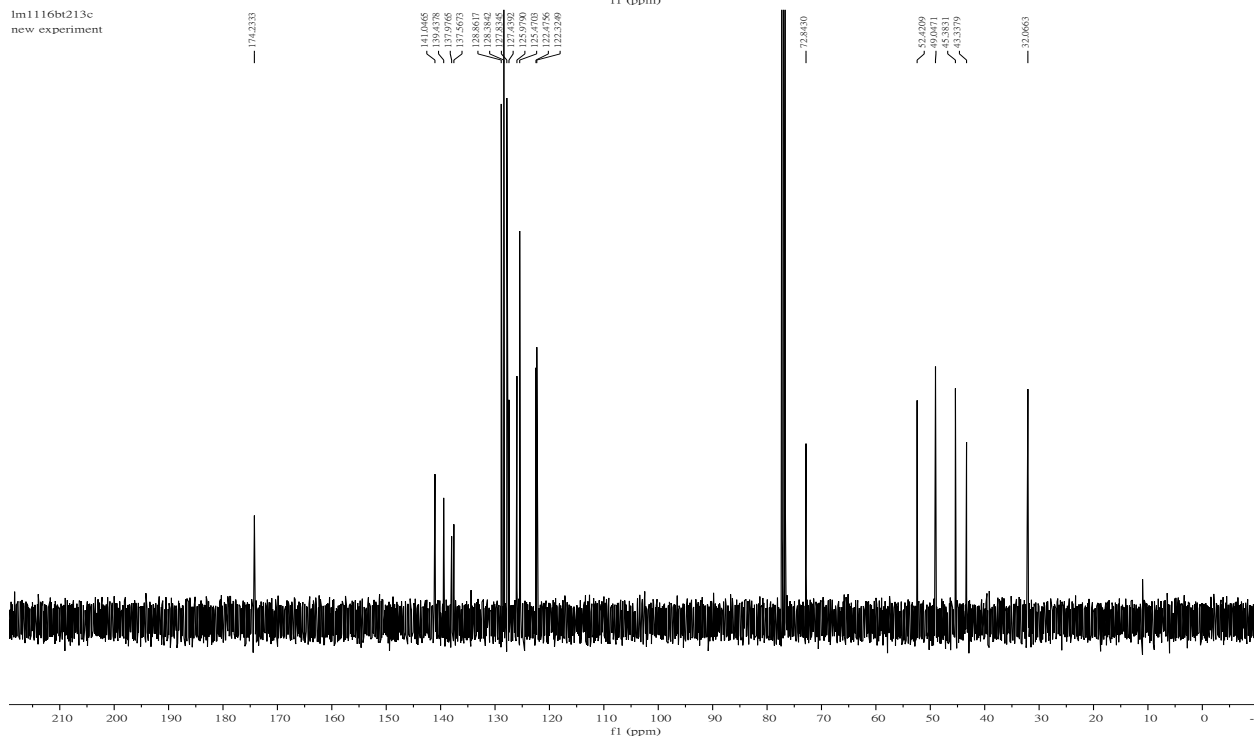

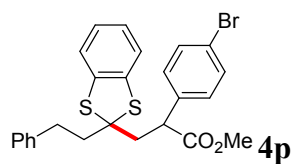

Im1121b1h  
new experiment

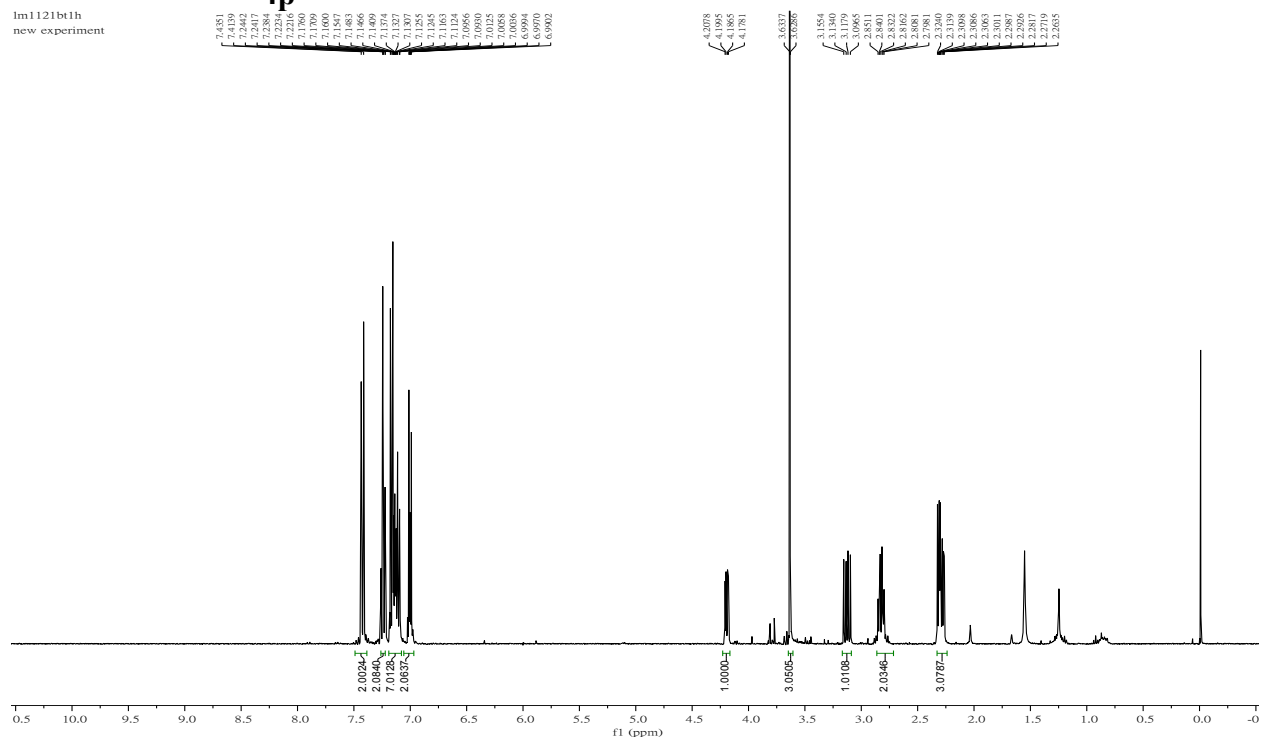

Im1121b13c  
new experiment

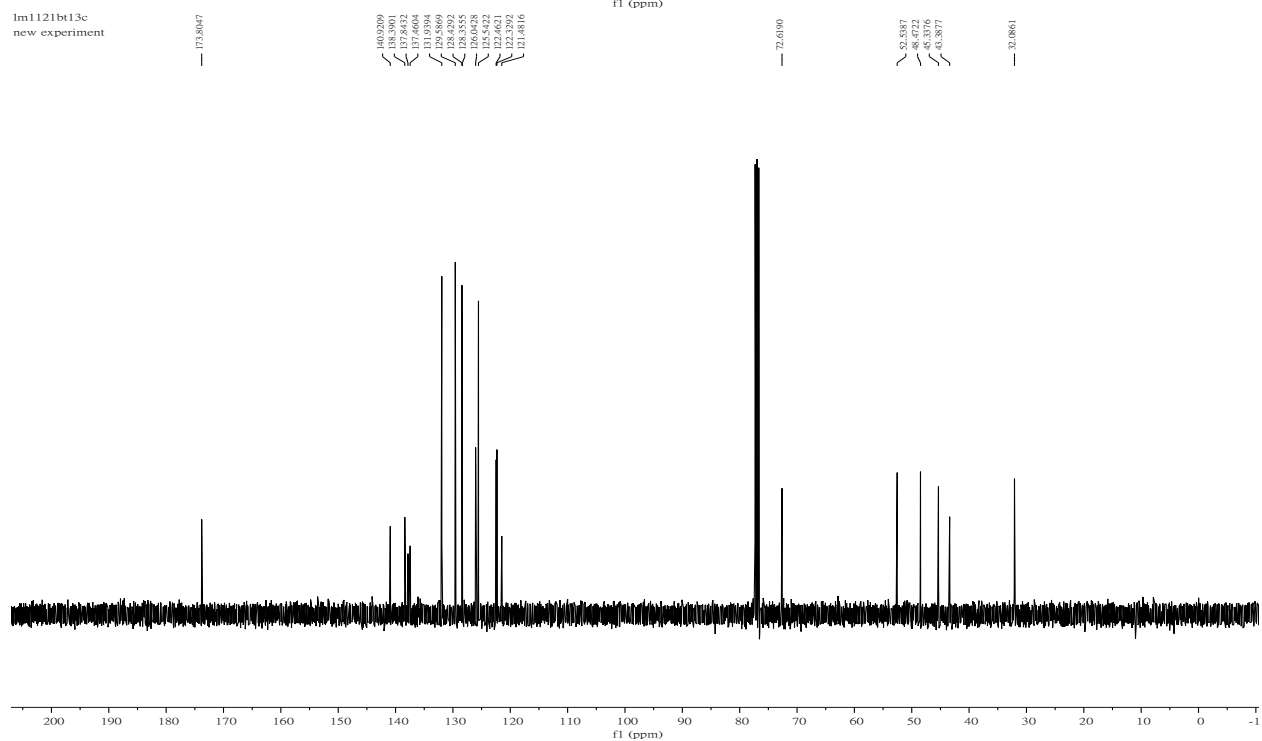

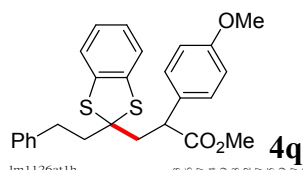

Im1126at1h

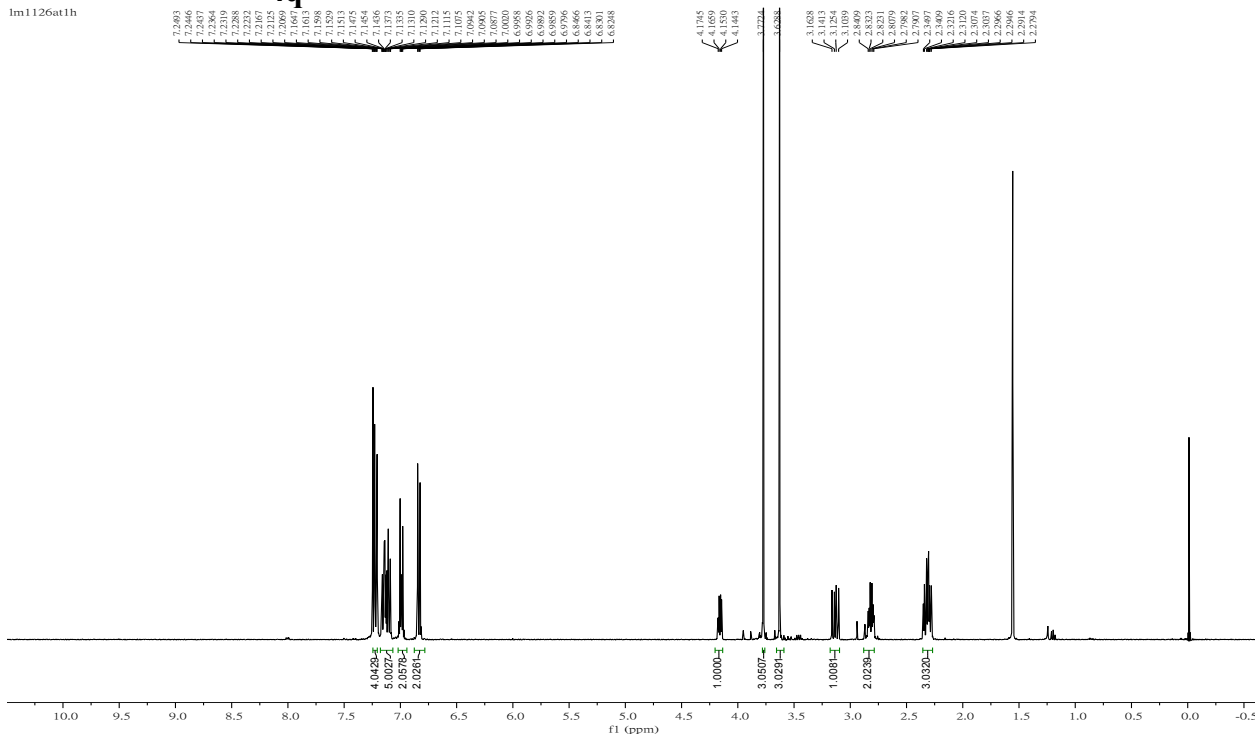

Im11262pht13c

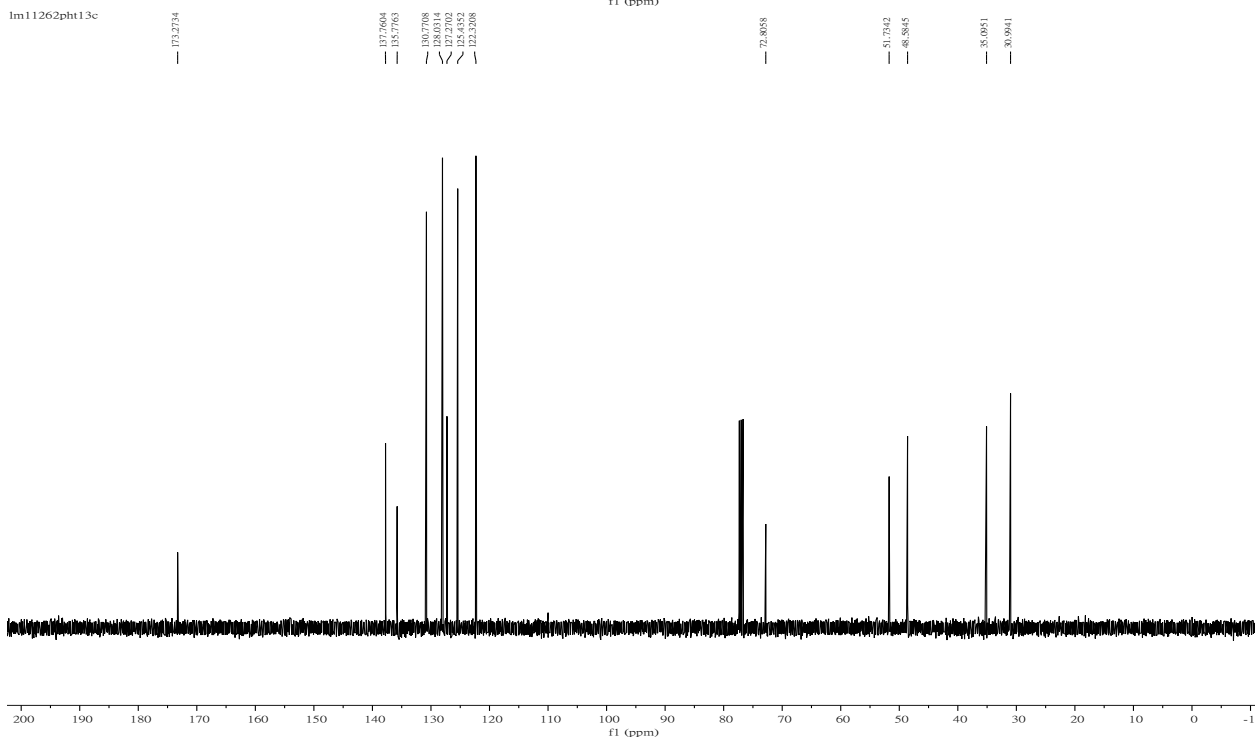

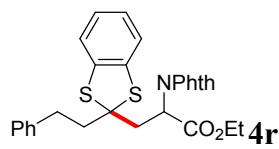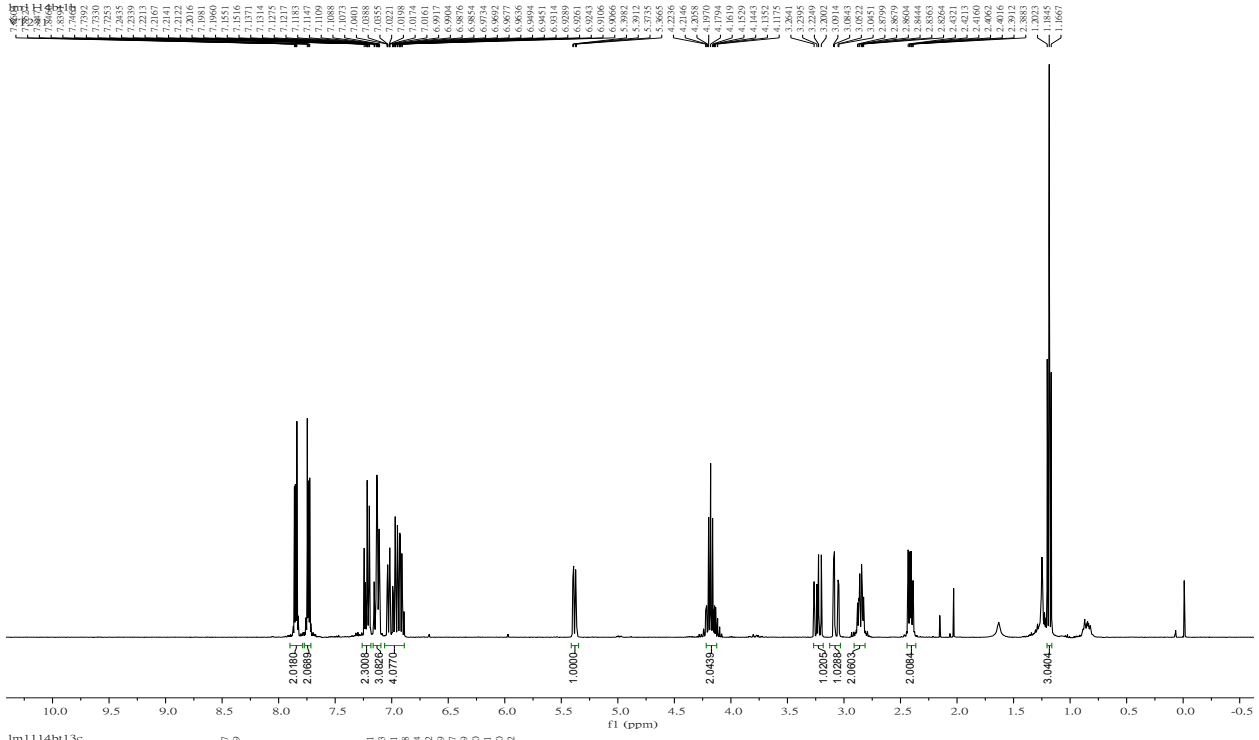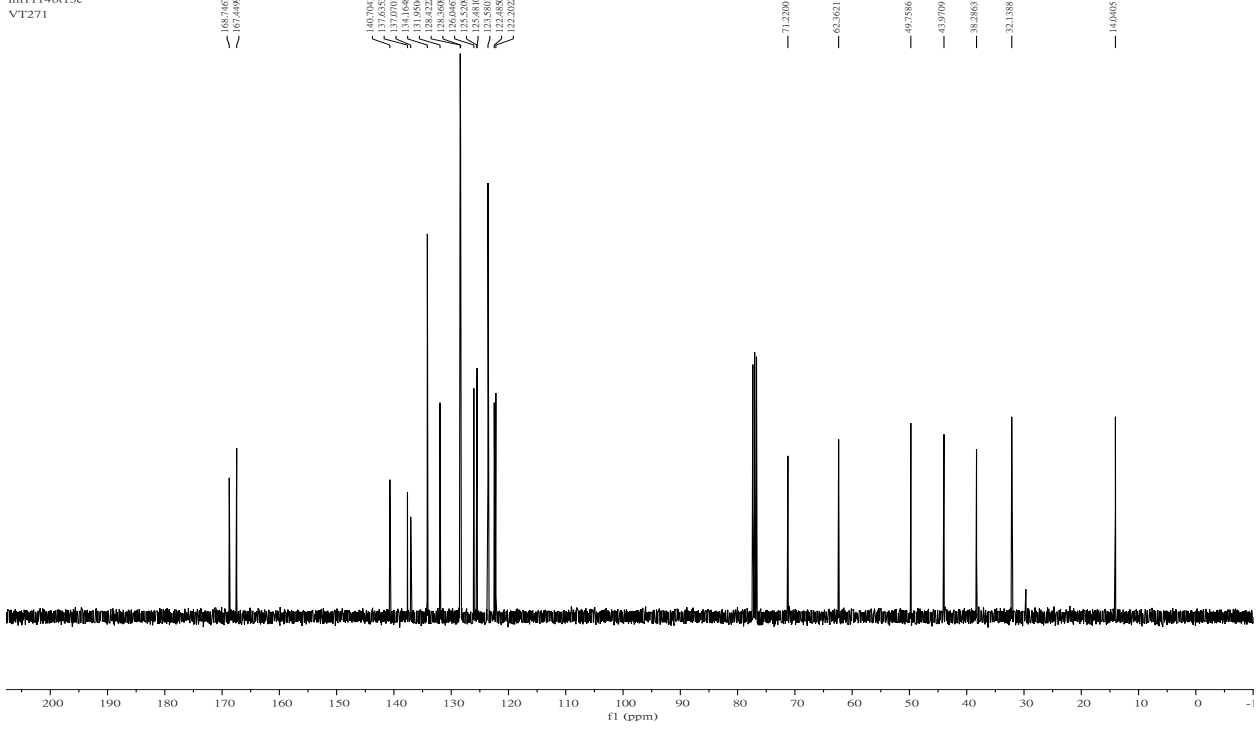

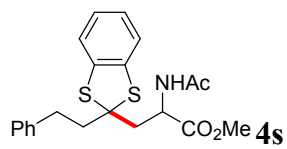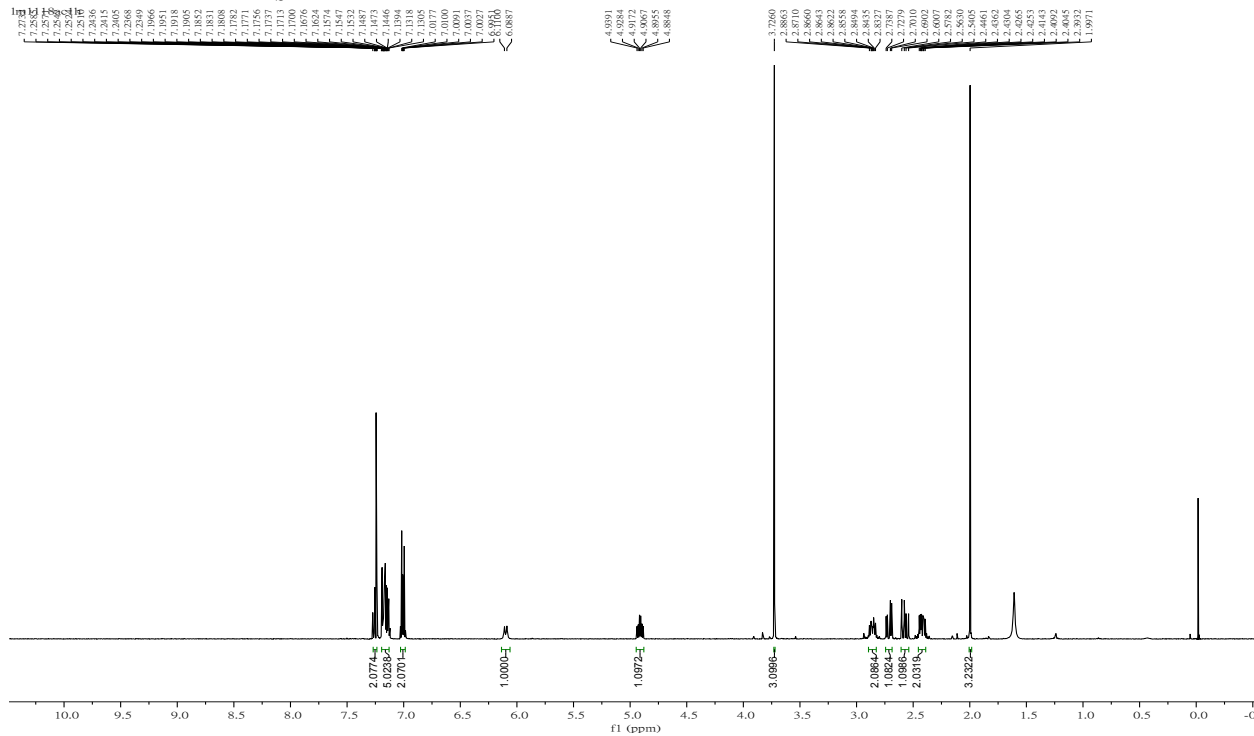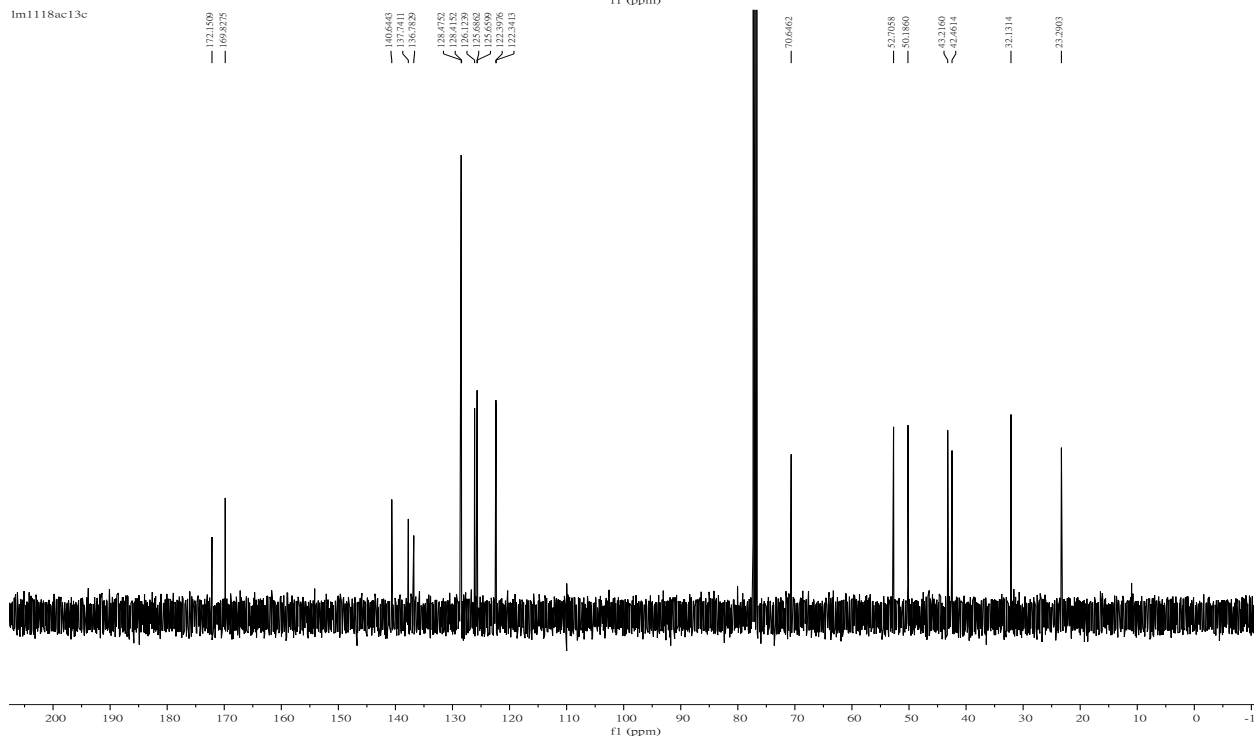



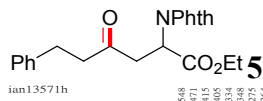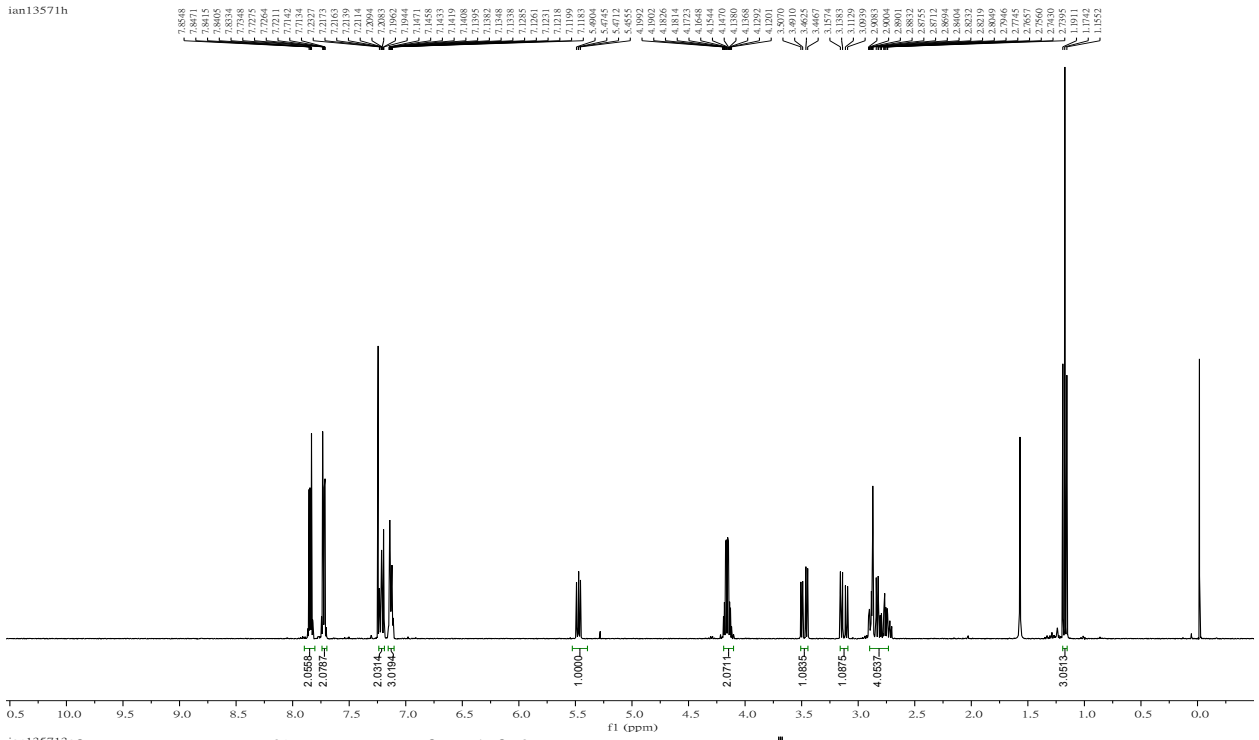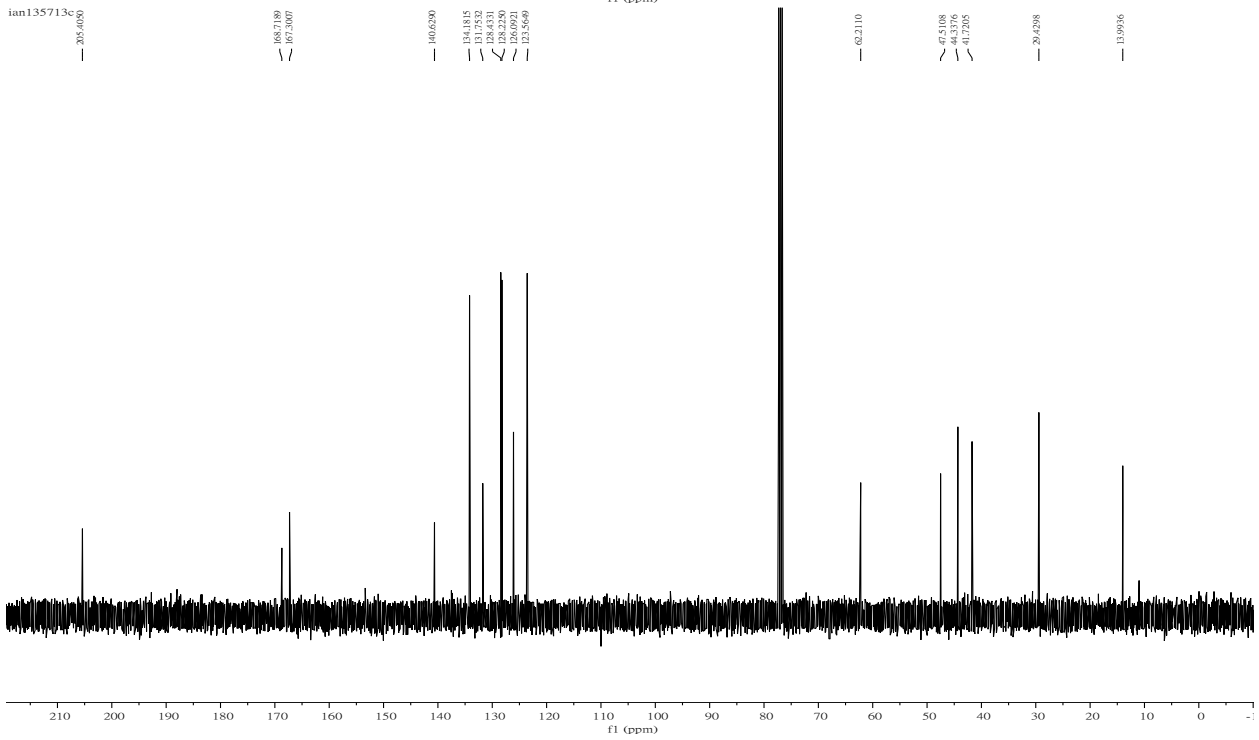

Supplement: c5ra19069j1.pdf [file c5ra19069j1.pdf]
